# Supplementary material for: Small-molecule inhibitors of human mitochondrial DNA transcription
Source: Springer Nature journal article supplement (doi:10.1038/s41586-020-03048-z), 2020-12-16
Supplement: MOESM1 [file 41586_2020_3048_MOESM1_ESM.pdf › 41586_2020_3048_MOESM1_ESM.pdf]

---

**Supplementary information**

---

**Small-molecule inhibitors of human  
mitochondrial DNA transcription**

---

In the format provided by the  
authors and unedited

## **Supplementary Information**

### **Supplementary Figures**

**Supplementary Figure 1: Uncropped gels of Figures 1, 3-4 and Extended Data Figures 1-4, 6-8.**

**Figure 1h**

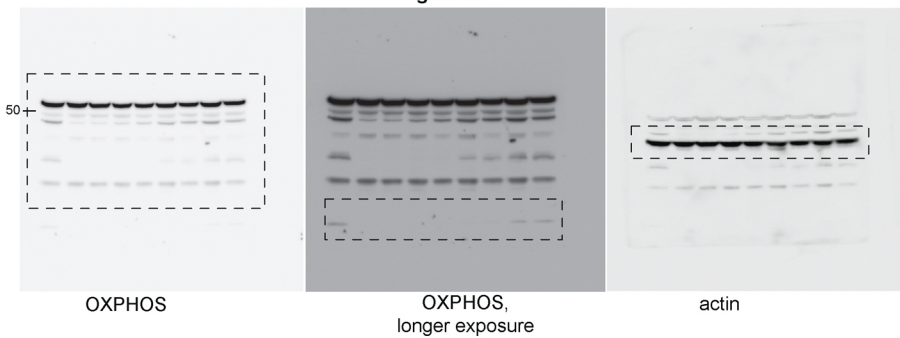

**Figure 3d**

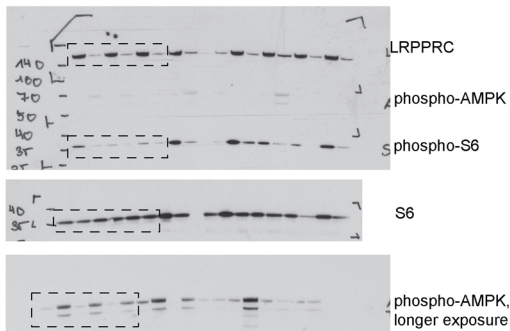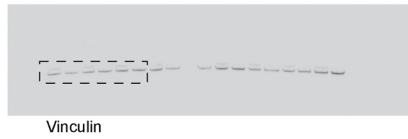

**Gel 1**

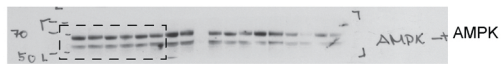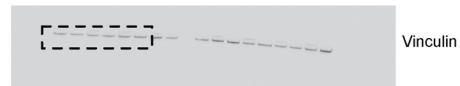

**Gel 2**



**Figure 4c**

**Tumour**

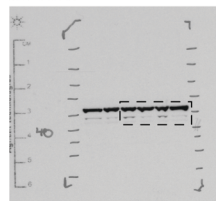

OXPHOS

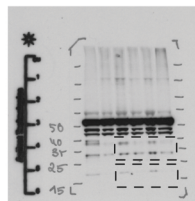

OXPHOS  
longer exposure  
actin

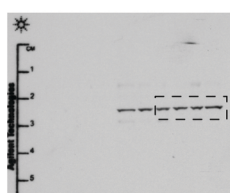

actin  
short exposure

**Gel 1**

**Liver**

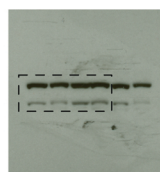

OXPHOS

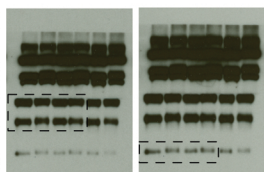

OXPHOS  
longer exposure

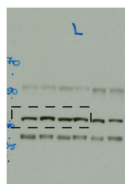

actin

**Gel 2**

**Heart**

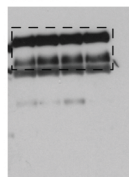

OXPHOS

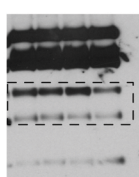

OXPHOS  
longer exposure

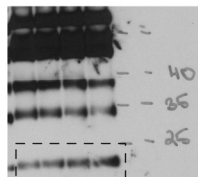

actin

**Gel 3**

Extended Data Figure 1e

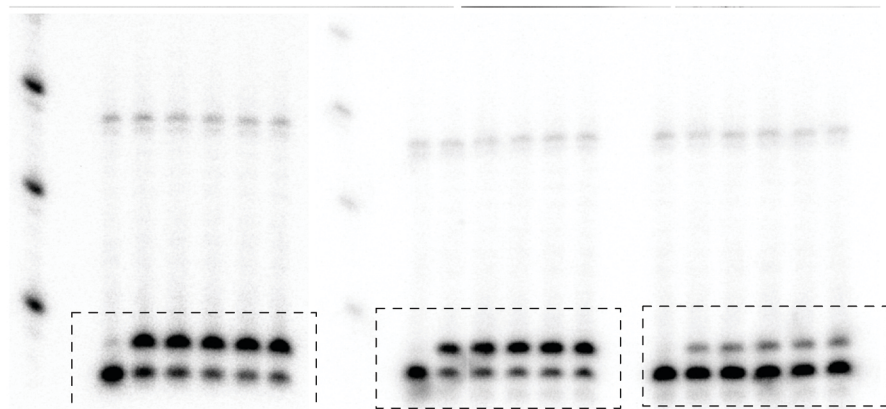

Extended Data Figure 1h

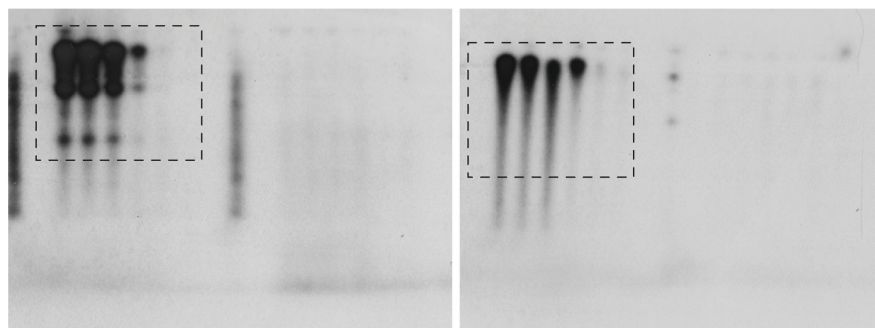

Extended Data Figure 2c

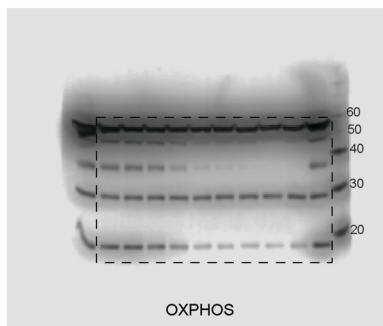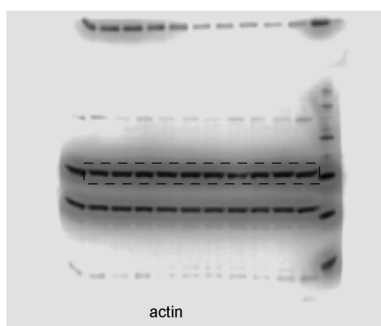

**Extended Data Figure 3a**

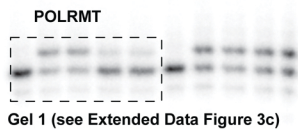

**Extended Data Figure 3b**

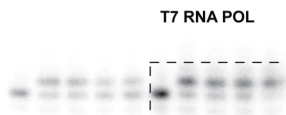

RPO41

Gel 2

**Extended Data Figure 3c**

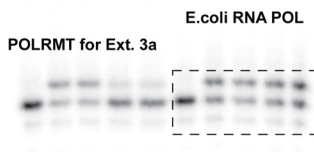

**Extended Data Figure 3d**

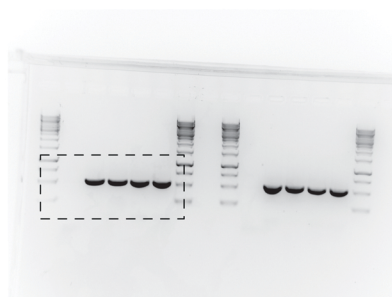

**Extended Data Figure 3e**

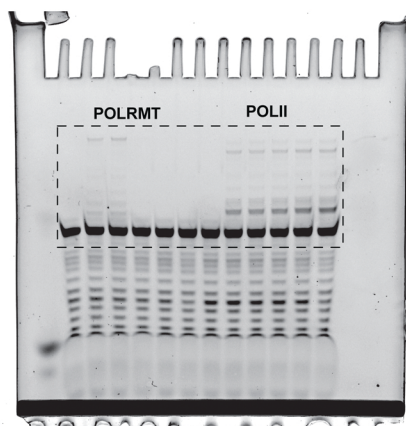

**Extended Data Figure 3g**

**POLG**

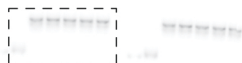

**Extended Data Figure 3h**

**Coomassie**

**S35-Methionine**

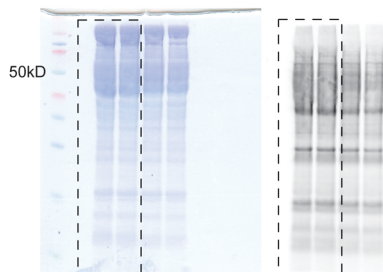

**Extended Data Figure 3k**

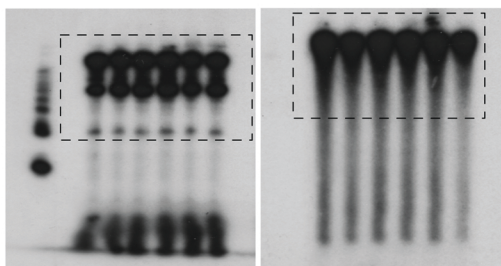

**Extended Data Figure 3o**

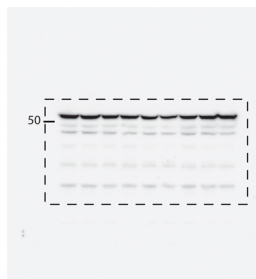

**OXPHOS**

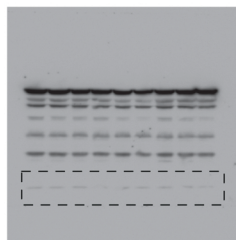

**OXPHOS  
longer exposure**

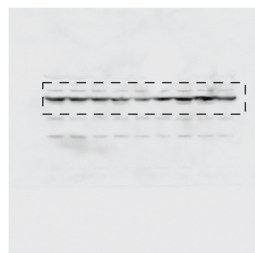

**actin**

**Extended Data Figure 4 b**

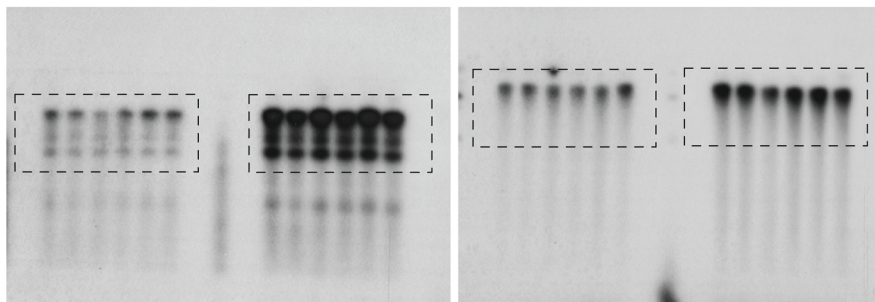

**Extended Data Figure 4 d**

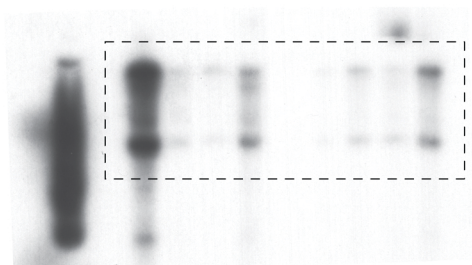

**Extended Data Figure 4 e**

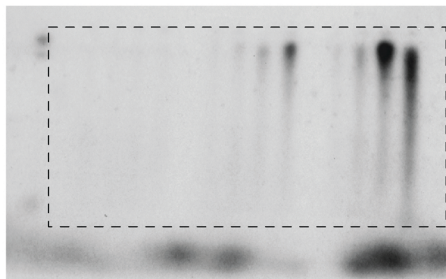

Extended Data Figure 6b

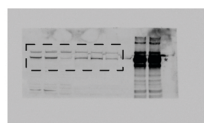

POLRMT  
\*recombinant protein

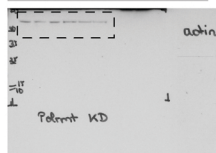

actin

POLRMT KD

**Extended Data Figure 7b**

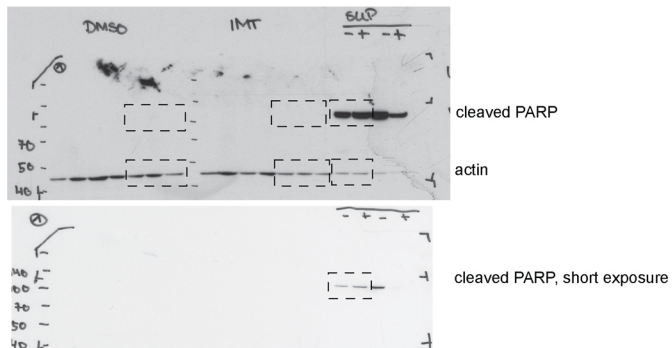

**Extended Data Figure 7c**

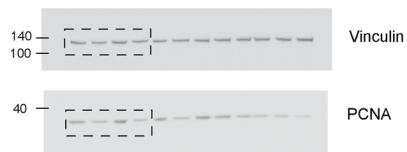



**Extended Data Figure 8 d**

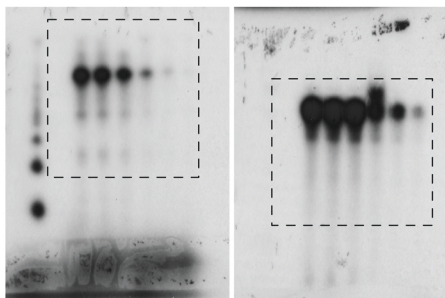

**Extended Data Figure 8 k**

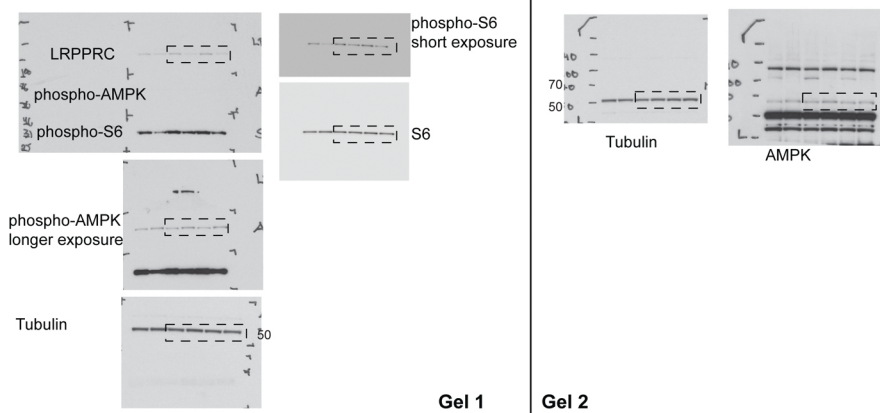

## Supplementary Methods

### Synthesis of IMTs

#### General Chemistry

Anhydrous solvents and reagents were purchased from various fine chemical suppliers and were used without further purification.  $^1\text{H}$  NMR spectra were taken on a Oxford Varian 400/54 (400 MHz) spectrometer or a Bruker Avance II (300 MHz) with residual protonated solvent ( $\text{CHCl}_3$   $\delta$  7.26; DMSO  $\delta$  2.49) as reference. Data was reported as follows: chemical shift, multiplicity (bs, broad singlet; s, singlet; d, doublet; t, triplet; q, quartet; and m, multiplet), coupling constant, and integration.  $^{13}\text{C}$  NMR spectra were taken on a Bruker Biospin with power gated H1 decoupling (150 MHz) spectrometer and showed an unusually complicated splitting pattern, due to the presence of diastereomers, Carbon-Fluorine Coupling and rotational effects. For this reason, the peaks assigned to the same carbon are shown between brackets. Final compounds were judged to be  $\geq 95\%$  pure by HPLC analysis using a Waters Acquity UPLC (Sample Manager, Binary Solvent Manager, Column Heater/Cooler, PDA e $\lambda$  Detector; SQ Detector), Column Acquity UPLC BEH C18 1.7  $\mu\text{m}$ , 2.1 x 50 mm, eluted with  $\text{H}_2\text{O}$  with 0.05% formic acid (Solvent A) and MeCN with 0.05% formic acid (Solvent B) at 0.5 mL/min. Gradient: elution from 5% to 100% B over 3.5 min with an initial hold of 0.5 min and a final hold at 100% B of 0.5 min. Total run time: 5 min or a HPLC/MS Waters (2767 Sample Manager, 515 HPLC Pump, 2525 Binary Gradient Module, 2996 Photodiode array Detector, Micromass ZQ Detector), Column Xterra<sup>®</sup> MS C18 5  $\mu\text{m}$  100 x 4.6 mm, eluted with  $\text{H}_2\text{O}$  with 0.1% formic acid (Solvent A) and MeCN (Solvent B) at 2 mL/min. Gradient: elution from 5% to 100% B over 7 min and a final hold at 100% B of 1.5 min. Total run time: 8.5 min. Reported yields are not optimized, with emphasis on purity of products rather than quantity.

## Scheme 1: synthesis of compounds IMT1 and IMT1B

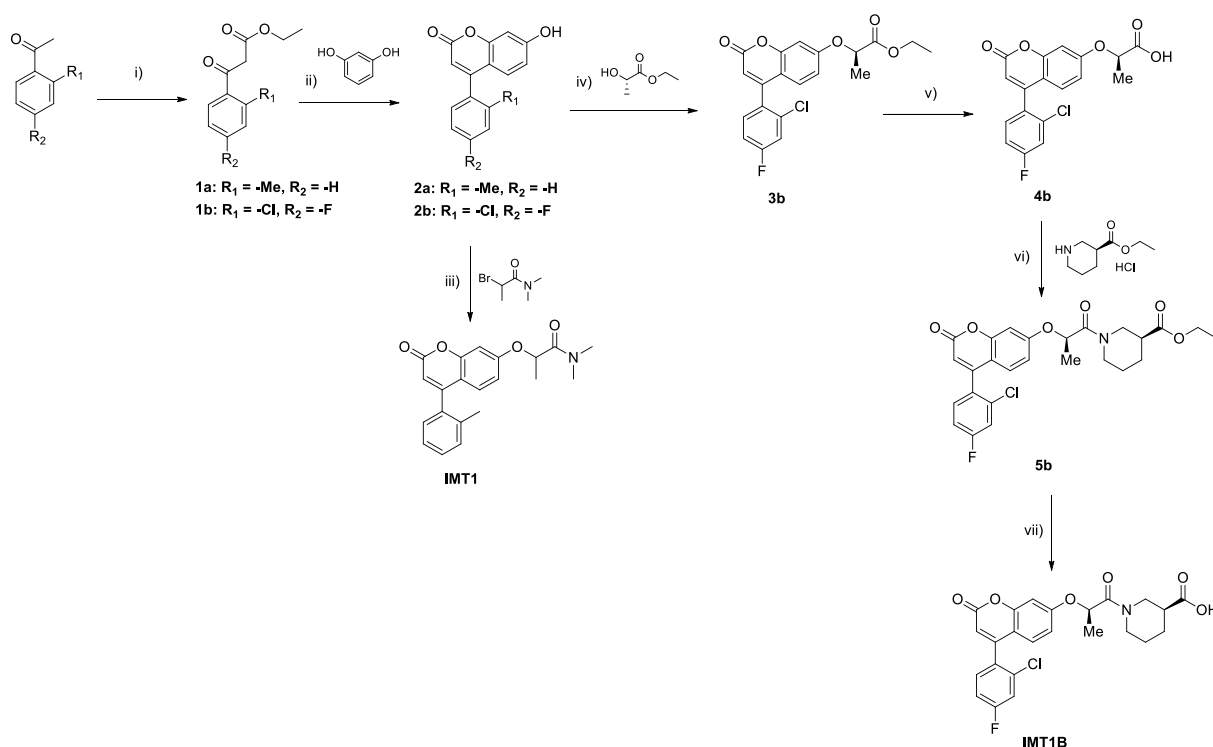

i) (EtCO)<sub>2</sub>O, 60% NaH in mineral oil, toluene, 50°C, 18h; ii) MsOH, 45°C, 2 h; iii) Cs<sub>2</sub>CO<sub>3</sub>, DMF, r.t., 1.5 h; iv) PPh<sub>3</sub>, DIAD, THF, 0°C to r.t., 4 h; v) 2 M NaOH, THF, 0°C to r.t., 1 - 3 h, b) 2 M HCl, 30 min; vi) EDC.HCl, HOBT.xH<sub>2</sub>O, Et<sub>3</sub>N, DMF, r.t., 1.5 h; vii) a) 2 M NaOH, THF, MeOH, 0°C to r.t., 1 - 3 h, b) 2 M HCl, 30min.

## Experimental procedures

### Condensation reaction to obtain intermediate 1b

#### Ethyl 3-(2-chloro-4-fluorophenyl)-3-oxopropanoate (1b)

60% NaH in mineral oil (4.86 g, 121.7 mmol) was washed with pentane and dried under a flow of nitrogen. Dry toluene (350 mL) was added and the suspension was cooled to 0°C. Diethyl carbonate (27.4 g, 231.8 mmol) was added dropwise over a period of 25 min, followed by 2-chloro-4-fluoroacetophenone (10 g, 57.9 mmol) over a period of 20 min. The cooling bath was removed, and the reaction heated to 50°C and stirred for 18 h. The reaction mixture was allowed to cool to r.t. and was poured into ice cold water (500 mL). The aqueous layer was acidified to pH 2 with 10% aq. HCl and extracted with Et<sub>2</sub>O. The combined organic phases were dried over MgSO<sub>4</sub>, filtered and evaporated *in vacuo* to yield the title compound **1b** (6.0 g, 42%) as a mixture of tautomers, which was used in the following step without further purification.

**Tautomer 1, ethyl 3-(2-chloro-4-fluorophenyl)-3-oxopropanoate:** <sup>1</sup>H NMR (300 MHz, Chloroform-*d*) δ 7.63 (dd, *J* = 8.8, 6.0 Hz, 1H), 7.14-6.93 (m, 2H), 4.12 (q, *J* = 7.1 Hz, 2H), 3.96 (s, 2H), 1.18 (t, *J* = 7.1 Hz, 3H); LCMS *t*<sub>R</sub> = 5.18 min, MS (ESI+) *m/z* 245.19, 247.18 (M+H)<sup>+</sup>, 43%.

**Tautomer 2, (Z)-ethyl 3-(2-chloro-4-fluorophenyl)-3-hydroxyacrylate:** <sup>1</sup>H NMR (300 MHz, Chloroform-*d*) δ 12.43 (s, 1H), 7.52 (dd, *J* = 8.7, 6.1 Hz, 1H), 7.14-6.93 (m, 2H), 5.48 (s, 1H),

4.21 (q,  $J = 7.1$  Hz, 2H), 1.27 (t,  $J = 7.1$  Hz, 3H); LCMS  $t_R = 6.38$  min, MS (ESI+)  $m/z$  245.19, 247.18 (M+H)<sup>+</sup>, 34%.

### General Procedure 1: Pechmann reaction to obtain intermediates 2

Intermediate **1** (1.05 eq) was dissolved in methansulfonic acid (30 mL/g) and resorcinol (1 eq) was added. The mixture was stirred at 45°C for 2 h, upon which the reaction was allowed to cool to r.t. EtOH was added dropwise, followed by water. The suspension was extracted with EtOAc and washed with brine. The combined organic layers were dried over MgSO<sub>4</sub> filtered, and evaporated *in vacuo*. The crude product was purified by column chromatography using a gradient of EtOAc in cHex to yield the title compound **2**.

#### 7-Hydroxy-4-(*o*-tolyl)-2H-chromen-2-one (2a)

Ethyl (2-methylbenzoyl)acetate **1a** (11.3 g, 54.8 mmol) was reacted with resorcinol (5.7 g, 51.8 mmol) according to **General Procedure 1** to yield the title compound **2a** (6.6 g, 51%) as a white solid.  $\delta$  <sup>1</sup>H NMR (300 MHz, DMSO-*d*<sub>6</sub>)  $\delta$  10.65 (s, 1H), 7.48 – 7.28 (m, 3H), 7.23 (dd,  $J = 7.5, 1.3$  Hz, 1H), 6.80 (dd,  $J = 5.5, 3.2$  Hz, 2H), 6.72 (dd,  $J = 8.7, 2.2$  Hz, 1H), 6.09 (s, 1H), 2.11 (s, 3H); LCMS  $t_R = 5.33$  min, MS (ESI+)  $m/z$  253.13 (M+H)<sup>+</sup>, 99%.

#### 4-(2-Chloro-4-fluorophenyl)-7-hydroxy-2H-chromen-2-one (2b)

Intermediate **1b** (28.2 g, 115 mmol) was reacted with resorcinol (12 g, 109 mmol) according to **General Procedure 1** to yield the title compound **2b** (25.4 g, 80%) as a pink solid. <sup>1</sup>H NMR (300 MHz, DMSO-*d*<sub>6</sub>)  $\delta$  10.70 (bs, 1H), 7.69 (dd,  $J = 8.9, 2.5$  Hz, 1H), 7.55 (dd,  $J = 8.6, 6.1$  Hz, 1H), 7.42 (td,  $J = 8.5, 2.6$  Hz, 1H), 6.91 – 6.77 (m, 2H), 6.74 (dd,  $J = 8.7, 2.3$  Hz, 1H), 6.21 (s, 1H); LCMS  $t_R = 5.28$  min, MS (ESI+)  $m/z$ : 291.10, 293.16 (M+H)<sup>+</sup>, 95%.

### Alkylation reaction to obtain compound IMT1

#### *N,N*-dimethyl-2-((2-oxo-4-(*o*-tolyl)-2H-chromen-7-yl)oxy)propanamide (IMT1)

Intermediate **2a** (70 mg, 0.277 mmol) was dissolved in DMF (2 mL) and Cs<sub>2</sub>CO<sub>3</sub> (121 mg, 0.555 mmol), followed by 2-bromo-*N,N*-dimethylpropanamide (58.1 g, 0.416 mmol) were added. The reaction was stirred at r.t. for 1.5 h. The mixture was diluted with water and extracted with EtOAc. The organic layer was washed with water and brine, dried over MgSO<sub>4</sub>, filtered, and evaporated *in vacuo*. The crude product was purified by flash chromatography on silica gel using a gradient of EtOAc in cHex to yield the title compound **IMT1** (79.8 mg, 82%) as an off-white solid.  $[\alpha]_D$  (deg cm<sup>3</sup> g<sup>-1</sup> dm<sup>-1</sup>) = -0,004 ( $c = 1$  mg cm<sup>-3</sup>, CHCl<sub>3</sub>, 20 °C); m.p.: 86.2°C; <sup>1</sup>H NMR (400 MHz, Chloroform-*d*)  $\delta$  7.31 (td,  $J = 7.5, 1.5$  Hz, 1H), 7.27 – 7.20 (m, 2H), 7.10 – 7.06 (m, 1H), 6.89 (d,  $J = 8.5$  Hz, 1H), 6.72 – 6.67 (m, 2H), 6.09 (s, 1H), 4.97 (qd,  $J = 6.7, 1.7$  Hz, 1H), 3.07 (d,  $J = 3.1$  Hz, 3H), 2.95 – 2.86 (m, 3H), 2.08 (d,  $J = 2.3$  Hz, 3H), 1.58 – 1.55 (m, 3H); <sup>13</sup>C

NMR (150 MHz, DMSO-*d*<sub>6</sub>)  $\delta$  169.64, 160.99, 160.49, 155.81, 155.35, 135.32, 135.11, 130.83, 129.58, 128.81, 128.19, 126.54, [113.63, 113.45], [113.07, 113.04], 112.52, 102.28, 71.26, 36.68, 35.80, 19.77, 17.58; LCMS  $t_R$  = 2.68 min, MS (ESI+)  $m/z$ : 351.72 (M+H)<sup>+</sup>, 99%; HRMS (FAB, *m*-NBA)  $m/z$  calc. for C<sub>21</sub>H<sub>22</sub>NO<sub>4</sub> 352.15433, found 352.15399 [M+H]<sup>+</sup>.

#### Mitsunobu reaction to obtain intermediate **3b**

##### **(R)-Ethyl 2-((4-(2-chloro-4-fluorophenyl)-2-oxo-2H-chromen-7-yl)oxy)propanoate (3b)**

Intermediate **2b** (12 g, 41.28 mmol) and PPh<sub>3</sub> (11.91 mg, 45.41 mmol) were dissolved in THF (7 mL), and (-)-Ethyl (*S*)-2-hydroxypropionate (7.07 ml, 61.92 mmol) was added. The reaction was cooled to 0°C and DIAD (8.94 ml, 45.41 mmol) was added dropwise. The reaction was then stirred at r.t. for 4 h. The mixture was diluted with EtOAc and washed with a sat. NaHCO<sub>3</sub> solution, a sat. NH<sub>4</sub>Cl solution, and water. The organic layer was dried over MgSO<sub>4</sub>, filtered, and evaporated *in vacuo*. The crude product was purified by flash chromatography on silica gel using a gradient of EtOAc in cHex to yield the title compound **3b** (13.53 g, 83%) as a colorless glue. <sup>1</sup>H NMR (400 MHz, DMSO-*d*<sub>6</sub>)  $\delta$  7.70 (ddd, *J* = 8.9, 2.5, 1.5 Hz, 1H), 7.57 (ddd, *J* = 8.6, 6.1, 1.5 Hz, 1H), 7.43 (tdd, *J* = 8.5, 2.6, 1.3 Hz, 1H), 7.02 (dd, *J* = 5.9, 2.4 Hz, 1H), 6.95 (dd, *J* = 8.9, 2.4 Hz, 1H), 6.88 (ddd, *J* = 8.9, 3.6, 2.5 Hz, 1H), 6.33 (s, 1H), 5.18 (dd, *J* = 6.8, 1.1 Hz, 1H), 4.16 (qd, *J* = 7.1, 1.4 Hz, 2H), 1.54 (dd, *J* = 6.8, 0.5 Hz, 3H), 1.19 (t, *J* = 7.1 Hz, 3H); LCMS  $t_R$  = 3.23min, MS (ESI+)  $m/z$ : 391.29, 393.32 (M+H)<sup>+</sup>, 100%.

#### General Procedure 3: Hydrolysis reaction to obtain intermediate **4b** or final compound **IMT1B**

Intermediate **3b** or **5b** (1 eq) was dissolved in THF and 2 M NaOH aq. solution was added at 0°C. A few drops of MeOH were added until the mixture was homogeneous. The reaction was allowed to warm up to r.t. stirring for 1 - 3 h, neutralized with 2 M HCl, and stirred for a further 30 min. The mixture was extracted with EtOAc and the combined organic phases were washed with water, dried over MgSO<sub>4</sub>, filtered, and evaporated *in vacuo* to yield the desired product **4b**. Alternatively, the crude product was purified by flash chromatography on silica gel using a gradient of MeOH in DCM to yield the desired products **IMT1B**.

##### **(R)-2-((4-(2-chloro-4-fluorophenyl)-2-oxo-2H-chromen-7-yl)oxy)propanoic acid (4b)**

Intermediate **3b** (13.53 g, 34.62 mmol) was hydrolyzed with 2 M NaOH aq. solution according to **General Procedure 3** to yield the title compound **4b** (12.55 g, 100%) as a white solid. <sup>1</sup>H NMR (400 MHz, DMSO-*d*<sub>6</sub>)  $\delta$  13.21 (s, 1H), 7.68 (ddd, *J* = 8.9, 2.5, 1.9 Hz, 1H), 7.54 (dd, *J* = 8.6, 6.1 Hz, 1H), 7.46 – 7.37 (m, 1H), 7.00 – 6.89 (m, 2H), 6.85 (ddd, *J* = 8.9, 2.5, 1.5 Hz, 1H), 5.04 (qd, *J* = 6.8, 2.0 Hz, 1H), 1.51 (d, *J* = 6.7 Hz, 3H); LCMS  $t_R$  = 2.70min, MS (ESI+)  $m/z$ : 363.30, 365.25 (M+H)<sup>+</sup>, 100%.

## Amide coupling to obtain intermediate 5b

### **(S)-ethyl 1-((R)-2-((4-(2-chloro-4-fluorophenyl)-2-oxo-2H-chromen-7-yl)oxy)propanoyl)piperidine-3-carboxylate (5b)**

Intermediate **4b** (13.51 g, 37.24 mmol) EDC.HCl (10.71 g, 55.87 mmol), and HOBT.xH<sub>2</sub>O (8.56 g, 55.87 mmol) were dissolved in DMF (370 mL) and (S)-piperidine-3-carboxylic acid ethyl ester (2R,3R)-2,3-dihydroxybutanedioate (7.03 g, 44.69 mmol) was added slowly. Et<sub>3</sub>N (7.8 mL, 55.87 mmol) was added, and the mixture was stirred at r.t. for 1.5 h. The reaction was diluted with EtOAc and washed with water, a sat. NaHCO<sub>3</sub> solution, a sat. NH<sub>4</sub>Cl solution, and again with water. The organic phase was dried over MgSO<sub>4</sub>, filtered and evaporated *in vacuo*. The crude product was purified by flash chromatography on silica gel using a gradient of EtOAc in cHex to yield the title compound **5b** (18.13 g, 97%) as a colorless glue.

<sup>1</sup>H NMR (400 MHz, DMSO-*d*<sub>6</sub>) δ 7.70 (dd, *J* = 8.9, 2.6 Hz, 1H), 7.60-7.52 (m, 1H), 7.43 (t, *J* = 8.6 Hz, 1H), 7.01 - 6.88 (m, 2H), 6.88 - 6.76 (m, 1H), 6.31 (s, 1H), 5.54 - 5.42 (m, 1H), 4.27 - 3.97 (m, 3H), 3.89 - 3.73 (m, 1H), 3.70 - 3.52 (m, 1H), 3.27 - 2.95 (m, 1H), 2.64 - 2.37 (m, 1H), 2.01 - 1.86 (m, 1H), 1.85 - 1.50 (m, 3H), 1.50 - 1.40 (m, 3H), 1.22 - 1.13 (m, 3H); LCMS *t*<sub>R</sub> = 3.08 min, MS (ESI+) *m/z*: 502.25, 504.27 (M+H)<sup>+</sup>, 100%.

### **(S)-1-((R)-2-((4-(2-chloro-4-fluorophenyl)-2-oxo-2H-chromen-7-yl)oxy)propanoyl)piperidine-3-carboxylic acid (IMT1B)**

Intermediate **5b** (18.13 g, 36.12 mmol) was hydrolyzed with 2 M NaOH aq. solution according to **General Procedure 3** to yield the title compound **IMT1B** (14.37 g, 84%) as a white solid. [α]<sub>D</sub> (deg cm<sup>3</sup> g<sup>-1</sup> dm<sup>-1</sup>) = +0.022 (*c* = 1 mg cm<sup>-3</sup>, CHCl<sub>3</sub>, 20 °C); m.p.: 149.8 °C; <sup>1</sup>H NMR (400 MHz, DMSO-*d*<sub>6</sub>) δ 12.46 (bs, 1H), 7.68 (dd, *J* = 8.9, 2.5 Hz, 1H), 7.58 - 7.50 (m, 1H), 7.41 (tdd, *J* = 8.5, 2.5, 0.9 Hz, 1H), 6.99 - 6.86 (m, 2H), 6.86 - 6.74 (m, 1H), 6.33 - 6.23 (m, 1H), 5.54 - 5.41 (m, 1H), 4.33 - 3.16 (m, 1H), 3.90 - 3.72 (m, 1H), 3.68 - 3.47 (m, 1H), 3.15 - 2.77 (m, 1H), 2.55 - 2.21 (m, 1H), 2.02 - 1.83 (m, 1H), 1.80 - 1.65 (m, 1H), 1.65 - 1.30 (m, 5H); <sup>13</sup>C NMR (150 MHz, DMSO-*d*<sub>6</sub>) δ [174.90, 174.56], 168.27, [163.66, 162.00], [161.30, 161.07], [160.31, 160.25], 155.26, 152.65, [132.98, 132.90], [132.66, 132.63, 132.60, 132.57], 130.81, [128.29, 128.21, 128.00], [117.77, 117.60], [115.64, 115.49], [113.68, 113.59], [113.51, 113.43, 113.27, 113.17], [112.60, 112.53, 112.47, 112.43], [102.65, 102.55, 102.39], [71.47, 71.39, 71.29, 71.24], [46.50, 45.28], [44.00, 42.17], [41.25, 41.00, 40.93], [27.17, 27.02], [25.29, 23.89, 23.84], [18.18, 18.15, 17.86, 17.81]; LCMS *t*<sub>R</sub> = 2.64 min, MS (ESI+) *m/z*: 474.27, 476.29 (M+H)<sup>+</sup>, 100%; HRMS (FAB, *m*-NBA) *m/z* calc. for C<sub>24</sub>H<sub>22</sub>NO<sub>6</sub>ClF 474.11142, C<sub>24</sub>H<sub>22</sub>NO<sub>6</sub><sup>37</sup>ClF 476.10847, found 474.10996 / 476.10717 [M+H]<sup>+</sup>.

## Supplementary Tables

**Supplementary Table 1: Cryo-EM data collection, refinement and validation statistics.**

|                                                     | POLRMT-IMT<br>(EMDB-11679)<br>(PDB 7A8P) |
|-----------------------------------------------------|------------------------------------------|
| <b>Data collection and processing</b>               |                                          |
| Magnification                                       | 105,000                                  |
| Voltage (kV)                                        | 300                                      |
| Electron exposure (e <sup>-</sup> /Å <sup>2</sup> ) | 36                                       |
| Defocus range (μm)                                  | 0.5 – 3.0                                |
| Pixel size (Å)                                      | 0.834                                    |
| Symmetry imposed                                    | C1                                       |
| Initial particle images (no.)                       | 1,446,981                                |
| Final particle images (no.)                         | 193,651                                  |
| Map resolution (Å)                                  | 3.5                                      |
| FSC threshold                                       | 0.143                                    |
| Map resolution range (Å)                            | 3.4 – 4.5                                |
| <b>Refinement</b>                                   |                                          |
| Initial model used (PDB code)                       | 4BOC                                     |
| Model resolution (Å)                                | 3.5                                      |
| FSC threshold                                       | 0.5                                      |
| Model resolution range (Å)                          | 3.4 – 4.5                                |
| Map sharpening <i>B</i> factor (Å <sup>2</sup> )    | -130                                     |
| Model composition                                   |                                          |
| Non-hydrogen atoms                                  | 7305                                     |
| Protein residues                                    | 911                                      |
| Ligands                                             | 1                                        |
| <i>B</i> factors (Å <sup>2</sup> )                  |                                          |
| Protein                                             | 54.32                                    |
| Ligand                                              | 27.65                                    |
| R.m.s. deviations                                   |                                          |
| Bond lengths (Å)                                    | 0.004                                    |
| Bond angles (°)                                     | 0.878                                    |
| Validation                                          |                                          |
| MolProbity score                                    | 1.12                                     |
| Clashscore                                          | 2.23                                     |
| Poor rotamers (%)                                   | 0.63                                     |
| Ramachandran plot                                   |                                          |
| Favored (%)                                         | 97.77                                    |

|                |      |
|----------------|------|
| Allowed (%)    | 2.23 |
| Disallowed (%) | 0.00 |

**Supplementary Table 2: Cell lines used in this study.**

| <b>Tissue origin</b> | <b>Cell line</b> | <b>Reference</b>   |
|----------------------|------------------|--------------------|
| <b>bladder</b>       | 5637             | ATCC® HTB-9        |
|                      | CLS-439          | CLS; 300150        |
|                      | J82              | ATCC® HTB-1        |
|                      | T24              | ATCC® HTB-4        |
|                      | UMUC3            | ATCC® CRL-1749     |
| <b>bone</b>          | MG63             | ATCC® CRL-1427     |
|                      | MHH-ES1          | CLS; 300136        |
|                      | RD-ES            | ATCC® HTB-166      |
|                      | SAOS2            | ATCC® HTB-85       |
|                      | U2OS             | ATCC® HTB-96       |
| <b>brain</b>         | SF-295           | NCI-DTP, SF-295    |
|                      | SK-N-AS          | ATCC® CRL-2137     |
|                      | SK-N-SH          | ATCC® HTB-11       |
|                      | SNB75            | NCI-DTP, SN-75     |
|                      | U87MG            | ATCC® HTB-14       |
| <b>breast</b>        | BT-20            | ATCC® HTB-19       |
|                      | Hs578T           | ATCC® HTB-126      |
|                      | JIMT1            | DSMZ, ACC 589      |
|                      | MCF7             | ATCC® HTB-22       |
|                      | MDA-MB-231       | ATCC® HTB-26       |
|                      | MDA-MB-436       | ATCC® HTB-130      |
|                      | MDA-MB-468       | ATCC® HTB-132      |
|                      | SKBR3            | ATCC® HTB-30       |
| <b>cervix</b>        | C33A             | ATCC® HTB-31       |
|                      | Ca Ski           | ATCC® CRM-CRL-1550 |
|                      | HeLa             | ATCC® CCL-2        |
| <b>colon</b>         | Caco-2           | ATCC® HTB-37       |
|                      | COLO 205         | ATCC® CCL-222      |
|                      | COLO-678         | DSMZ, ACC 194      |



|                          |            |                    |
|--------------------------|------------|--------------------|
|                          | DLD-1      | ECACC, 90102540    |
|                          | HCT-116    | ATCC® CCL-247      |
|                          | HCT-15     | ATCC® CCL-225      |
|                          | HT-29      | ATCC® HTB-38       |
|                          | LoVo       | ATCC® CCL-229      |
|                          | SW620      | ATCC® CCL-227      |
| <b>connective tissue</b> | HT-1080    | ATCC® CCL-121      |
| <b>hematological</b>     | GRANTA-519 | DSMZ, ACC 342      |
|                          | HL-60      | DSMZ, ACC 3        |
|                          | K-562      | DSMZ, ACC 10       |
|                          | Kasumi-1   | DSMZ, ACC 220      |
|                          | L-363      | DZMZ, ACC 49       |
|                          | Mino       | DSMZ, ACC 687      |
|                          | MV-4-11    | DSMZ, ACC 102      |
|                          | PBMC       | donor specific     |
|                          | Ramos      | DSMZ, ACC602       |
|                          | SU-DHL-10  | DSMZ, ACC 576      |
|                          | SU-DHL-6   | DSMZ, ACC 572      |
|                          | THP-1      | DSMZ, ACC 16       |
|                          | WSU-NHL    | DSMZ, ACC 58       |
| <b>kidney</b>            | 786-O      | ATCC® CRL-1932     |
|                          | ACHN       | ATCC® CRL-1611     |
|                          | Caki-1     | ATCC® HTB-46       |
|                          | Hek293     | ATCC® CRL-1573     |
|                          | UO-31      | NCI-DTP, UO-31     |
| <b>liver</b>             | HepG2      | ATCC® HB-8065      |
|                          | PLC/PRF/5  | ATCC® CRL-8024     |
|                          | SK-HEP-1   | ATCC® HTB-52       |
| <b>lung</b>              | A549       | ATCC® CCL-185      |
|                          | Calu-6     | ATCC® HTB-56       |
|                          | IMR-90     | ATCC® CCL-186      |
|                          | NCI-H292   | ATCC® CRL-1848     |
|                          | NCI-H358M  | NCI-DTP, NCI-H358M |
|                          | NCI-H460   | ATCC® HTB-177      |

|                 |            |                    |
|-----------------|------------|--------------------|
|                 | NCI-H82    | ATCC® HTB-175      |
| <b>muscle</b>   | A-204      | ATCC® HTB-82       |
|                 | A-673      | ATCC® CRL-1598     |
|                 | Hs729      | ATCC® HTB-153      |
|                 | RD         | ATCC® CCL-136      |
| <b>ovary</b>    | A2780      | ECACC 93112519     |
|                 | EFO-21     | DSMZ, ACC 235      |
|                 | IGROV1     | NCI-DTP, IGR-OV1   |
|                 | OVCAR3     | ATCC® HTB-161      |
|                 | OVCAR4     | NCI-DTP, OVCAR-4   |
|                 | SK-OV-3    | ATCC® HTB-77       |
| <b>pancreas</b> | AsPC-1     | ATCC® CRL-1682     |
|                 | BxPC-3     | ATCC® CRL-1687     |
|                 | MIA PaCa-2 | ATCC® CRM-CRL-1420 |
|                 | PANC-1     | ATCC® CRL-1469     |
|                 | Panc 10.05 | ATCC® CRL-2547     |
| <b>placenta</b> | JAR        | ATCC® HTB-144      |
|                 | JEG-3      | ATCC® HTB-36       |
| <b>prostate</b> | 22Rv1      | ATCC® CRL-2505     |
|                 | DU 145     | ATCC® HTB-81       |
|                 | PC-3       | ATCC® CRL-1435     |
| <b>skin</b>     | A-375      | ATCC® CRL-1619     |
|                 | A-431      | ATCC® CRL-1555     |
|                 | SK-MEL-28  | ATCC® HTB-72       |
|                 | SK-MEL-5   | ATCC® HTB-70       |
| <b>vulva</b>    | SK-LMS-1   | ATCC® HTB-88       |

ATCC, American Type Culture Collection (Manassas, VA, USA); CLS, Cell Line Service GmbH (Eppelheim, Germany); NCI-DTP, National Institutes of Cancer – Developmental Therapeutics Program (Bethesda, MD, USA); DSMZ, DSMZ-German Collection of Microorganisms and Cell Cultures GmbH (Braunschweig, Germany); ECACC, European Collection of Authenticated Cell Cultures (Salisbury, UK).

**Supplementary Table 3: Mission esiRNA pools used in this study.**

|                                                                                                                                                                                                                                                                                                                                                                                                                                                                                                                                                                                                                                                                                                                                                                                |                             |
|--------------------------------------------------------------------------------------------------------------------------------------------------------------------------------------------------------------------------------------------------------------------------------------------------------------------------------------------------------------------------------------------------------------------------------------------------------------------------------------------------------------------------------------------------------------------------------------------------------------------------------------------------------------------------------------------------------------------------------------------------------------------------------|-----------------------------|
| <b>ID</b>                                                                                                                                                                                                                                                                                                                                                                                                                                                                                                                                                                                                                                                                                                                                                                      | esiRNA against EGFP         |
| <b>Catalogue-#</b>                                                                                                                                                                                                                                                                                                                                                                                                                                                                                                                                                                                                                                                                                                                                                             | EHUEGFP (Sigma-Aldrich)     |
| <b>esiRNA cDNA target sequence:</b>                                                                                                                                                                                                                                                                                                                                                                                                                                                                                                                                                                                                                                                                                                                                            |                             |
| GTGAGCAAGGGCGAGGAGCTGTTACCGGGGTGGTGGCCATCCTGGTCGAGCTGGACGGCGACG<br>TAAACGGCCACAAGTTCAGCGTGTCCGGCGAGGGCGAGGGCGATGCCACCTACGGCAAGCTGAC<br>CCTGAAGTTCATCTGCACCACCGGCAAGCTGCCCCGTGCCCTGGCCCACCCTCGTGACCACCCTGAC<br>CTACGGCGTGCAGTGCTTCAGCCGCTACCCCGACCACATGAAGCAGCACGACTTCTTCAAGTCCGC<br>CATGCCCCGAAGGCTACGTCCAGGAGCGCACCATCTTCTTCAAGGACGACGGCAACTACAAGACCC<br>GCGCCGAGGTGAAGTTCGAGGGCGACACCCTGGTGAACCGCATCGAGCTGAAGGGCATCGACTT<br>CAAGGAGGACGGCAACATCCTGGGGCACAAGCTGGAGTACAACACAAGCCACAACGTCTAT<br>ATCATGGCCGACAAGCAGAAGAACGGCATCAAGGTGAACCTCAAGATCCGCCACAACATCGAGG<br>ACGGCAGCGTGCAGCTCGCCGACCACTACCAGCAGAACACCCCCATCGGCGACGGCCCCGTGCTG<br>CTGCCCCGACAACCACTACCTGAGCACCCAGTCCGCCCTGAGCAAAGACCCCAACGAGAAGCGCGA<br>TCACATGGTCTCTGCTGGAGTTCGTGACCGCCGCGGGGATCACTCTCGGCATGGACGAGCTGTA |                             |
| <b>ID</b>                                                                                                                                                                                                                                                                                                                                                                                                                                                                                                                                                                                                                                                                                                                                                                      | esiRNA against human POLRMT |
| <b>Catalogue-#</b>                                                                                                                                                                                                                                                                                                                                                                                                                                                                                                                                                                                                                                                                                                                                                             | EHU012581 (Sigma-Aldrich)   |
| <b>esiRNA cDNA target sequence:</b>                                                                                                                                                                                                                                                                                                                                                                                                                                                                                                                                                                                                                                                                                                                                            |                             |
| CAGGTGCTGGAAGGTTTCATCACCCGCAAGGTGGTGAAGCAGACGGTGATGACGGTGGTGTACG<br>GGGTCACGCGCTATGGCGGGCGCCTGCAGATTGAGAAGCGCCTCCGGGAGCTGAGCGACTTTCC<br>CCAGGAGTTCGTGTGGGAGGCCTCTCACTATCTCGTACGCCAGGTCTTCAAGAGTCTACAGGAGA<br>TGTTCTCGGGGACCCGGGCCATCCAGCACTGGCTGACCGAGAGTGCCCGCCTCATCTCCACATG<br>GGCTCTGTGGTGGAGTGGGTACACCCCTGGGCGTCCCCGTCATCCAGCCCTATCGCCTGGACTCC<br>AAGGTCAAGCAAATAGGAGGTGGAATTCAGAGCATCACCTACACCCACAACGGAGACATCAGCC<br>GAAAGCCCAACACACGTAAGCAGAAGAACGGCTTCCCGCCCAACTTCATCCACTCGCTGGACTCCT<br>CCCACATGATGCTCACCGCCCTGCACTGCTACAGGAAGGGCCTGACCTTCGTCTCTGTGCAC                                                                                                                                                                                                                 |                             |

**Supplementary Table 4: Taqman probes used in this study.**

| <b>Reagent</b>                               | <b>Source</b>     | <b>Identifier</b> |
|----------------------------------------------|-------------------|-------------------|
| Taqman Assay: human CytB                     | Life Technologies | Hs02596867_s1     |
| Taqman Assay: human ND1                      | Life Technologies | Hs02596873_s1     |
| Taqman Assay: human COX1                     | Life Technologies | Hs02596864_g1     |
| Taqman Assay: human RNA, 45S pre-ribosomal 5 | Life Technologies | Hs05627131_gH     |
| Taqman Assay: human RNA, 5S ribosomal 1      | Life Technologies | Hs03682751_gH     |
| Taqman Assay: human POLRMT                   | Life Technologies | Hs04187596_g1     |
| Taqman Assay: human 18S                      | Life Technologies | Hs99999901_s1     |
| Taqman Assay: mouse ND1                      | Life Technologies | Mm04225274_s1     |

|                                          |                   |               |
|------------------------------------------|-------------------|---------------|
| Taqman Assay: mouse CytB                 | Life Technologies | Mm04225271_g1 |
| Taqman Assay: mouse COX1                 | Life Technologies | Mm04225243_g1 |
| Taqman Assay: mouse ACTB                 | Life Technologies | Mm01205647_g1 |
| Taqman Assay: mouse beta-2-microglobulin | Life Technologies | Mm00437762_m1 |

**Supplementary Table 5: MRM transitions.**

| Compound class               | Compound                | Precursor | Fragment     | dwell time | cone V | collision | Function | RT         | Ionization mode      |
|------------------------------|-------------------------|-----------|--------------|------------|--------|-----------|----------|------------|----------------------|
| deoxynucleotide triphosphate | dATP                    | 490,02    | 158,89       | 0,066      | 30     | 26        | 33       | quantifier | [M-H <sup>+</sup> ]- |
| deoxynucleotide triphosphate | dATP                    | 490,02    | 391,97       | 0,066      | 30     | 24        | 33       | qualifier  | [M-H <sup>+</sup> ]- |
| deoxynucleotide triphosphate | dCTP                    | 465,98    | 158,81       | 0,078      | 28     | 30        | 29       | quantifier | [M-H <sup>+</sup> ]- |
| deoxynucleotide triphosphate | dCTP                    | 465,98    | 368,01       | 0,078      | 28     | 20        | 29       | qualifier  | [M-H <sup>+</sup> ]- |
| deoxynucleotide triphosphate | dGTP                    | 505,98    | 158,88       | 0,138      | 30     | 34        | 34       | quantifier | [M-H <sup>+</sup> ]- |
| deoxynucleotide triphosphate | dGTP                    | 505,98    | 408          | 0,138      | 30     | 20        | 34       | qualifier  | [M-H <sup>+</sup> ]- |
| deoxynucleotide triphosphate | dTTP                    | 480,83    | 158,88       | 0,066      | 28     | 46        | 30       | quantifier | [M-H <sup>+</sup> ]- |
| deoxynucleotide triphosphate | dTTP                    | 480,83    | 383          | 0,066      | 28     | 20        | 30       | qualifier  | [M-H <sup>+</sup> ]- |
| glycolysis                   | 3-Phosphoglyceric acid  | 184,97    | 96,95        | 0,057      | 20     | 12        | 9        | quantifier | [M-H <sup>+</sup> ]- |
| glycolysis                   | 3-Phosphoglyceric acid  | 184,97    | 78,91        | 0,057      | 20     | 10        | 9        | qualifier  | [M-H <sup>+</sup> ]- |
| glycolysis                   | Fructose 1,6-P          | 339,06    | 96,95        | 0,066      | 26     | 22        | 20       | quantifier | [M-H <sup>+</sup> ]- |
| glycolysis                   | Fructose 1,6-P          | 339,06    | 241,06       | 0,066      | 26     | 14        | 20       | qualifier  | [M-H <sup>+</sup> ]- |
| glycolysis                   | Phosphoenolpyruvic acid | 166,97    | 78,95        | 0,057      | 14     | 10        | 7        | quantifier | [M-H <sup>+</sup> ]- |
| glycolysis                   | Phosphoenolpyruvic acid | 166,97    | 138,93       | 0,057      | 14     | 8         | 7        | qualifier  | [M-H <sup>+</sup> ]- |
| glycolysis                   | Pyruvic acid            | 86,84     | <b>42,95</b> | 0,245      | 18     | 16        | 1        | quantifier | [M-H <sup>+</sup> ]- |
| glycolysis                   | Pyruvic acid            | 86,84     | 58,97        | 0,245      | 18     | 8         | 1        | qualifier  | [M-H <sup>+</sup> ]- |
| IS                           | ATP_C13                 | 516,16    | 158,98       | 0,066      | 38     | 36        | 36       | quantifier | [M-H <sup>+</sup> ]- |
| IS                           | ATP_C13                 | 516,16    | 418,16       | 0,066      | 38     | 20        | 36       | qualifier  | [M-H <sup>+</sup> ]- |
| IS                           | Citric acid d4          | 195,1     | 113,11       | 0,057      | 16     | 12        | 12       | quantifier | [M-H <sup>+</sup> ]- |
| IS                           | Citric acid d4          | 195,1     | 88,77        | 0,057      | 16     | 18        | 12       | qualifier  | [M-H <sup>+</sup> ]- |
| nucleotide diphosphate       | ADP                     | 425,98    | 158,85       | 0,078      | 32     | 28        | 27       | quantifier | [M-H <sup>+</sup> ]- |
| nucleotide diphosphate       | ADP                     | 425,98    | 272,88       | 0,078      | 32     | 28        | 27       | qualifier  | [M-H <sup>+</sup> ]- |
| nucleotide diphosphate       | CDP                     | 401,96    | 158,86       | 0,057      | 32     | 26        | 25       | quantifier | [M-H <sup>+</sup> ]- |
| nucleotide diphosphate       | CDP                     | 401,96    | 303,98       | 0,057      | 32     | 18        | 25       | qualifier  | [M-H <sup>+</sup> ]- |
| nucleotide diphosphate       | GDP                     | 441,98    | 150          | 0,138      | 30     | 30        | 28       | quantifier | [M-H <sup>+</sup> ]- |
| nucleotide diphosphate       | GDP                     | 441,98    | 344,06       | 0,138      | 30     | 16        | 28       | qualifier  | [M-H <sup>+</sup> ]- |
| nucleotide diphosphate       | UDP                     | 402,94    | 158,86       | 0,066      | 34     | 26        | 26       | quantifier | [M-H <sup>+</sup> ]- |
| nucleotide diphosphate       | UDP                     | 402,94    | 110,94       | 0,066      | 34     | 20        | 26       | qualifier  | [M-H <sup>+</sup> ]- |
| nucleotide monophosphate     | AMP                     | 346       | 133,97       | 0,061      | 30     | 30        | 22       | quantifier | [M-H <sup>+</sup> ]- |

|                          |                        |        |        |       |    |    |    |            |         |
|--------------------------|------------------------|--------|--------|-------|----|----|----|------------|---------|
| nucleotide monophosphate | AMP                    | 346    | 96,89  | 0,061 | 30 | 24 | 22 | qualifier  | [M-H+]- |
| nucleotide monophosphate | CMP                    | 322,03 | 96,92  | 0,066 | 28 | 22 | 17 | quantifier | [M-H+]- |
| nucleotide monophosphate | CMP                    | 322,03 | 210,98 | 0,066 | 28 | 16 | 17 | qualifier  | [M-H+]- |
| nucleotide monophosphate | GMP                    | 362,12 | 78,9   | 0,066 | 30 | 24 | 24 | quantifier | [M-H+]- |
| nucleotide monophosphate | GMP                    | 362,12 | 210,96 | 0,066 | 30 | 14 | 24 | qualifier  | [M-H+]- |
| nucleotide monophosphate | IMP                    | 346,98 | 78,86  | 0,066 | 28 | 18 | 23 | quantifier | [M-H+]- |
| nucleotide monophosphate | IMP                    | 346,98 | 96,9   | 0,066 | 28 | 20 | 23 | qualifier  | [M-H+]- |
| nucleotide monophosphate | UMP                    | 322,96 | 210,96 | 0,057 | 28 | 12 | 18 | quantifier | [M-H+]- |
| nucleotide monophosphate | UMP                    | 322,96 | 96,9   | 0,057 | 28 | 20 | 18 | qualifier  | [M-H+]- |
| nucleotide triphosphate  | ATP                    | 506,1  | 158,94 | 0,066 | 36 | 32 | 35 | quantifier | [M-H+]- |
| nucleotide triphosphate  | ATP                    | 506,1  | 408,04 | 0,066 | 36 | 16 | 35 | qualifier  | [M-H+]- |
| nucleotide triphosphate  | CTP                    | 481,93 | 384,02 | 0,066 | 26 | 20 | 31 | quantifier | [M-H+]- |
| nucleotide triphosphate  | CTP                    | 481,93 | 158,9  | 0,066 | 26 | 22 | 31 | qualifier  | [M-H+]- |
| nucleotide triphosphate  | GTP                    | 521,96 | 158,86 | 0,138 | 36 | 32 | 37 | quantifier | [M-H+]- |
| nucleotide triphosphate  | GTP                    | 521,96 | 424,02 | 0,138 | 36 | 20 | 37 | qualifier  | [M-H+]- |
| nucleotide triphosphate  | UTP                    | 482,92 | 158,85 | 0,066 | 30 | 20 | 32 | quantifier | [M-H+]- |
| nucleotide triphosphate  | UTP                    | 482,92 | 385    | 0,066 | 30 | 20 | 32 | qualifier  | [M-H+]- |
| TCA                      | alfa_Ketoglutaric acid | 144,82 | 56,94  | 0,061 | 16 | 10 | 6  | quantifier | [M-H+]- |
| TCA                      | alfa_Ketoglutaric acid | 144,82 | 72,94  | 0,061 | 16 | 14 | 6  | qualifier  | [M-H+]- |
| TCA                      | Cis-Aconitic acid      | 172,86 | 84,9   | 0,057 | 16 | 14 | 8  | quantifier | [M-H+]- |
| TCA                      | Cis-Aconitic acid      | 172,86 | 110,93 | 0,057 | 16 | 8  | 8  | qualifier  | [M-H+]- |
| TCA                      | Citric acid            | 190,9  | 110,92 | 0,057 | 20 | 12 | 11 | quantifier | [M-H+]- |
| TCA                      | Citric acid            | 190,9  | 86,92  | 0,057 | 20 | 18 | 11 | qualifier  | [M-H+]- |
| TCA                      | Fumaric acid           | 114,97 | 70,96  | 0,061 | 18 | 6  | 3  | quantifier | [M-H+]- |
| TCA                      | Fumaric acid           | 114,97 | 44,96  | 0,061 | 22 | 20 | 3  | qualifier  | [M-H+]- |
| TCA                      | Isocitric acid         | 190,9  | 72,93  | 0,057 | 20 | 20 | 10 | quantifier | [M-H+]- |
| TCA                      | Isocitric acid         | 190,9  | 154,94 | 0,057 | 20 | 12 | 10 | qualifier  | [M-H+]- |
| TCA                      | Malic acid             | 132,87 | 42,94  | 0,066 | 18 | 12 | 5  | quantifier | [M-H+]- |
| TCA                      | Malic acid             | 132,87 | 70,28  | 0,066 | 20 | 18 | 5  | qualifier  | [M-H+]- |
| TCA                      | Succinic acid          | 116,97 | 72,97  | 0,066 | 20 | 10 | 4  | quantifier | [M-H+]- |
| TCA                      | Succinic acid          | 116,97 | 98,99  | 0,066 | 20 | 12 | 4  | qualifier  | [M-H+]- |

**Supplementary Table 6: Definition of boxplots shown in Extended Data Figure 2d (IMT1) and Extended Data Figure 3p (Con IMT).**

| category               | comparison | compound | lower whisker | lower box hinge | median | upper box hinge | upper whisker |
|------------------------|------------|----------|---------------|-----------------|--------|-----------------|---------------|
| Complex I              | 0h         | IMT1     | -0,297        | -0,056          | 0,049  | 0,108           | 0,199         |
| Complex II             | 0h         | IMT1     | -0,017        | -0,017          | 0,086  | 0,188           | 0,188         |
| Complex III            | 0h         | IMT1     | -0,086        | -0,08           | -0,038 | 0,104           | 0,177         |
| Complex IV             | 0h         | IMT1     | -0,206        | -0,125          | -0,113 | 0,012           | 0,184         |
| Complex V              | 0h         | IMT1     | -0,099        | -0,076          | -0,026 | 0,008           | 0,128         |
| cytosolic ribosome     | 0h         | IMT1     | -0,35         | -0,144          | -0,078 | -0,006          | 0,156         |
| mitochondrial ribosome | 0h         | IMT1     | -0,217        | -0,089          | -0,026 | 0,027           | 0,167         |
| Complex I              | 24h        | IMT1     | -1,409        | -0,819          | -0,601 | -0,273          | 0,461         |
| Complex II             | 24h        | IMT1     | -0,088        | -0,088          | -0,041 | 0,007           | 0,007         |
| Complex III            | 24h        | IMT1     | -1,019        | -0,584          | -0,211 | 0,076           | 0,484         |
| Complex IV             | 24h        | IMT1     | -0,54         | -0,502          | -0,324 | -0,17           | 0,035         |
| Complex V              | 24h        | IMT1     | -0,205        | -0,13           | -0,071 | 0,09            | 0,181         |
| cytosolic ribosome     | 24h        | IMT1     | -0,358        | -0,147          | -0,06  | 0,024           | 0,277         |
| mitochondrial ribosome | 24h        | IMT1     | -2,337        | -1,376          | -1,052 | -0,725          | 0,067         |
| Complex I              | 48h        | IMT1     | -1,539        | -1,193          | -0,837 | -0,387          | 0,217         |
| Complex II             | 48h        | IMT1     | 0,018         | 0,018           | 0,084  | 0,15            | 0,15          |
| Complex III            | 48h        | IMT1     | -1,086        | -0,941          | -0,668 | 0,089           | 0,238         |
| Complex IV             | 48h        | IMT1     | -1,45         | -1,006          | -0,997 | -0,701          | -0,701        |
| Complex V              | 48h        | IMT1     | -0,04         | -0,018          | 0,006  | 0,055           | 0,159         |
| cytosolic ribosome     | 48h        | IMT1     | -0,114        | -0,007          | 0,026  | 0,069           | 0,153         |
| mitochondrial ribosome | 48h        | IMT1     | -2,171        | -1,6            | -1,352 | -1,109          | -0,406        |
| Complex I              | 6h         | IMT1     | -0,216        | -0,124          | -0,053 | 0,034           | 0,201         |
| Complex II             | 6h         | IMT1     | -0,024        | -0,024          | 0,014  | 0,052           | 0,052         |
| Complex III            | 6h         | IMT1     | -0,31         | -0,205          | -0,01  | 0,096           | 0,329         |
| Complex IV             | 6h         | IMT1     | -0,324        | -0,153          | 0,01   | 0,041           | 0,061         |
| Complex V              | 6h         | IMT1     | -0,285        | -0,163          | -0,087 | -0,016          | 0,108         |
| cytosolic ribosome     | 6h         | IMT1     | -0,363        | -0,169          | -0,095 | -0,031          | 0,118         |
| mitochondrial ribosome | 6h         | IMT1     | -0,616        | -0,301          | -0,204 | -0,068          | 0,221         |
| Complex I              | 96h        | IMT1     | -2,381        | -1,918          | -1,532 | -1,053          | 0,168         |
| Complex II             | 96h        | IMT1     | 0,049         | 0,049           | 0,067  | 0,085           | 0,085         |
| Complex III            | 96h        | IMT1     | -1,747        | -1,562          | -1,449 | -0,062          | 0,304         |
| Complex IV             | 96h        | IMT1     | -2,026        | -1,718          | -1,496 | -0,755          | -0,138        |
| Complex V              | 96h        | IMT1     | -0,065        | 0,003           | 0,034  | 0,075           | 0,132         |
| cytosolic ribosome     | 96h        | IMT1     | -0,084        | 0,006           | 0,033  | 0,069           | 0,14          |
| mitochondrial ribosome | 96h        | IMT1     | -2,595        | -2,019          | -1,815 | -1,477          | -0,72         |
| Complex I              | 0h         | Con IMT  | -0,098        | -0,018          | 0,027  | 0,063           | 0,157         |
| Complex II             | 0h         | Con IMT  | 0,077         | 0,077           | 0,081  | 0,086           | 0,086         |
| Complex III            | 0h         | Con IMT  | -0,1          | 0,018           | 0,035  | 0,159           | 0,209         |
| Complex IV             | 0h         | Con IMT  | -0,004        | 0,001           | 0,011  | 0,041           | 0,079         |
| Complex V              | 0h         | Con IMT  | -0,044        | -0,015          | 0,012  | 0,039           | 0,049         |
| cytosolic ribosome     | 0h         | Con IMT  | -0,143        | -0,051          | -0,014 | 0,03            | 0,114         |

|                        |      |         |        |        |        |        |        |
|------------------------|------|---------|--------|--------|--------|--------|--------|
| mitochondrial ribosome | 0h   | Con IMT | -0,041 | -0,002 | 0,016  | 0,048  | 0,107  |
| Complex I              | 48h  | Con IMT | -0,167 | -0,097 | -0,049 | -0,005 | 0,104  |
| Complex II             | 48h  | Con IMT | 0,018  | 0,018  | 0,045  | 0,072  | 0,072  |
| Complex III            | 48h  | Con IMT | -0,046 | -0,046 | -0,037 | -0,016 | 0,01   |
| Complex IV             | 48h  | Con IMT | -0,336 | -0,255 | -0,133 | -0,091 | 0,087  |
| Complex V              | 48h  | Con IMT | -0,13  | -0,06  | -0,035 | -0,006 | 0,052  |
| cytosolic ribosome     | 48h  | Con IMT | -0,178 | -0,089 | -0,056 | -0,009 | 0,09   |
| mitochondrial ribosome | 48h  | Con IMT | -0,159 | -0,087 | -0,048 | -0,016 | 0,071  |
| Complex I              | 120h | Con IMT | -0,228 | -0,129 | -0,08  | -0,053 | 0,041  |
| Complex II             | 120h | Con IMT | -0,003 | -0,003 | 0,007  | 0,017  | 0,017  |
| Complex III            | 120h | Con IMT | -0,177 | -0,069 | 0,004  | 0,058  | 0,115  |
| Complex IV             | 120h | Con IMT | -0,432 | -0,323 | -0,271 | -0,16  | -0,046 |
| Complex V              | 120h | Con IMT | -0,111 | -0,031 | 0,022  | 0,033  | 0,083  |
| cytosolic ribosome     | 120h | Con IMT | -0,108 | -0,018 | 0,024  | 0,054  | 0,134  |
| mitochondrial ribosome | 120h | Con IMT | -0,107 | -0,038 | -0,007 | 0,019  | 0,068  |
