# Supplementary material for: Small-molecule inhibitors of human mitochondrial DNA transcription
Source: Springer Nature journal article supplement (doi:10.1038/s41586-020-03048-z), 2020-12-16
Supplement: MOESM3 [file 41586_2020_3048_MOESM3_ESM.xlsx]

## Sheet: 1 b
0 µM IMT1B			10 µM IMT1B
Temperature (°C)	Fnorm (A. U.)		Temperature (°C)	Fnorm (A. U.)		Values given are Mean values
4	0.5925		4	0.226
4.5	0.5805		4.5	0.219
5	0.5686		5	0.212
5.5	0.5566		5.5	0.205
6	0.5447		6	0.1981
6.5	0.5327		6.5	0.1911
7	0.5208		7	0.1841
7.5	0.5086		7.5	0.1771
8	0.4964		8	0.17
8.5	0.4843		8.5	0.163
9	0.4724		9	0.1562
9.5	0.4607		9.5	0.1496
10	0.4493		10	0.1432
10.5	0.4382		10.5	0.137
11	0.4275		11	0.1311
11.5	0.4171		11.5	0.1255
12	0.4071		12	0.1202
12.5	0.3974		12.5	0.1151
13	0.388		13	0.1102
13.5	0.3789		13.5	0.1055
14	0.37		14	0.1009
14.5	0.3615		14.5	0.0965
15	0.3531		15	0.0922
15.5	0.3451		15.5	0.0879
16	0.3371		16	0.0837
16.5	0.3293		16.5	0.0796
17	0.3217		17	0.0758
17.5	0.3142		17.5	0.0719
18	0.3068		18	0.0683
18.5	0.2997		18.5	0.0647
19	0.2926		19	0.0611
19.5	0.2857		19.5	0.0575
20	0.279		20	0.054
20.5	0.2723		20.5	0.0505
21	0.2658		21	0.0471
21.5	0.2595		21.5	0.0439
22	0.2534		22	0.041
22.5	0.2476		22.5	0.0381
23	0.242		23	0.0352
23.5	0.2367		23.5	0.0324
24	0.2315		24	0.0294
24.5	0.2266		24.5	0.0263
25	0.2221		25	0.0233
25.5	0.2178		25.5	0.0206
26	0.2138		26	0.018
26.5	0.2103		26.5	0.0157
27	0.2072		27	0.0135
27.5	0.2047		27.5	0.0115
28	0.2026		28	0.0096
28.5	0.2011		28.5	0.007713
29	0.2		29	0.0059907
29.5	0.1994		29.5	0.0043822
30	0.1995		30	0.0028129
30.5	0.2005		30.5	0.0015222
31	0.2025		31	0.0006434
31.5	0.2058		31.5	5.1001e-05
32	0.2107		32	0
32.5	0.2172		32.5	0.00061202
33	0.2255		33	0.0018596
33.5	0.236		33.5	0.0037663
34	0.249		34	0.0066106
34.5	0.265		34.5	0.0104
35	0.2844		35	0.0154
35.5	0.3078		35.5	0.0217
36	0.3354		36	0.0295
36.5	0.3673		36.5	0.0389
37	0.4036		37	0.0501
37.5	0.444		37.5	0.0632
38	0.4882		38	0.0784
38.5	0.5354		38.5	0.0961
39	0.5848		39	0.1167
39.5	0.6351		39.5	0.1403
40	0.6851		40	0.1675
40.5	0.7335		40.5	0.1987
41	0.7791		41	0.2341
41.5	0.821		41.5	0.2741
42	0.8588		42	0.3191
42.5	0.8918		42.5	0.369
43	0.92		43	0.4236
43.5	0.9434		43.5	0.4825
44	0.9622		44	0.5449
44.5	0.9768		44.5	0.6094
45	0.9875		45	0.6741
45.5	0.9947		45.5	0.7372
46	0.9989		46	0.7964
46.5	1		46.5	0.8494
47	0.9986		47	0.8948
47.5	0.9949		47.5	0.9318
48	0.9894		48	0.9601
48.5	0.9821		48.5	0.9802
49	0.9733		49	0.9928
49.5	0.963		49.5	0.999
50	0.9514		50	1
50.5	0.9386		50.5	0.9968
51	0.9247		51	0.9903
51.5	0.9098		51.5	0.9815
52	0.8943		52	0.9709
52.5	0.8783		52.5	0.9589
53	0.8622		53	0.9462
53.5	0.8467		53.5	0.9333
54	0.8322		54	0.921
54.5	0.8188		54.5	0.9095
55	0.8066		55	0.8997
55.5	0.7958		55.5	0.8923
56	0.7868		56	0.8878
56.5	0.7796		56.5	0.886
57	0.7751		57	0.8879
57.5	0.774		57.5	0.8925
58	0.775		58	0.8985
58.5	0.7773		58.5	0.9047
59	0.7799		59	0.91
59.5	0.7815		59.5	0.9126
60	0.7815		60	0.9127
60.5	0.7801		60.5	0.9107
61	0.7773		61	0.9066
61.5	0.7728		61.5	0.9006
62	0.7664		62	0.8924
62.5	0.7577		62.5	0.8818
63	0.7467		63	0.8685
63.5	0.7337		63.5	0.8532
64	0.7193		64	0.8364
64.5	0.7043		64.5	0.8191
65	0.6892		65	0.8018
65.5	0.6742		65.5	0.785
66	0.6596		66	0.7684
66.5	0.6451		66.5	0.752
67	0.6306		67	0.7355
67.5	0.6162		67.5	0.719
68	0.6018		68	0.7023
68.5	0.5873		68.5	0.6856
69	0.5728		69	0.6687
69.5	0.5581		69.5	0.6517
70	0.5434		70	0.6344
70.5	0.5285		70.5	0.6168
71	0.5134		71	0.5987
71.5	0.4982		71.5	0.5802
72	0.4827		72	0.5612
72.5	0.467		72.5	0.5418
73	0.451		73	0.5221
73.5	0.4349		73.5	0.5023
74	0.4189		74	0.4825
74.5	0.4029		74.5	0.4629
75	0.3873		75	0.4438
75.5	0.3721		75.5	0.4254
76	0.3575		76	0.4076
76.5	0.3436		76.5	0.3905
77	0.3304		77	0.3742
77.5	0.3181		77.5	0.3587
78	0.3065		78	0.3439
78.5	0.2957		78.5	0.33
79	0.2855		79	0.317
79.5	0.2759		79.5	0.3049
80	0.2669		80	0.2936
80.5	0.2582		80.5	0.2829
81	0.2497		81	0.2725
81.5	0.2414		81.5	0.2622
82	0.2329		82	0.2518
82.5	0.2242		82.5	0.2415
83	0.2153		83	0.2309
83.5	0.2063		83.5	0.2202
84	0.1968		84	0.2094
84.5	0.1872		84.5	0.1985
85	0.1773		85	0.1875
85.5	0.1672		85.5	0.1766
86	0.157		86	0.1658
86.5	0.1468		86.5	0.1553
87	0.1367		87	0.1451
87.5	0.1266		87.5	0.1351
88	0.1167		88	0.1253
88.5	0.1069		88.5	0.1157
89	0.0972		89	0.1062
89.5	0.0877		89.5	0.0968
90	0.0785		90	0.0877
90.5	0.0696		90.5	0.0789
91	0.061		91	0.0706
91.5	0.0528		91.5	0.0628
92	0.0448		92	0.0555
92.5	0.037		92.5	0.0484
93	0.0292		93	0.0414
93.5	0.0216		93.5	0.0345
94	0.0141		94	0.0273
94.5	0.0067535		94.5	0.0201
95	0		95	0.0126

## Sheet: 1 c
0 µM IMT1B			0.1 µM IMT1B			10 µM IMT1B				Michaelis-Menten fit to 0 µM IMT1B			Michaelis-Menten fit to 0.1 µM IMT1B			Michaelis-Menten fit to 10 µM IMT1B
[ATP] (nM)	V0 (fmol.min-1)	SD	[ATP] (nM)	V0 (fmol.min-1)	SD	[ATP] (nM)	V0 (fmol.min-1)	SD		[ATP] (nM)	V0 (fmol.min-1)		[ATP] (nM)	V0 (fmol.min-1)		[ATP] (nM)	V0 (fmol.min-1)
0	0	0	0	0	0	0	0	0		0	0		0	0		0	0
31.25	41.3032	3.68935	31.25	27.8482	5.17905	31.25	8.1843	3.18798		1.9531	8.4159		1.9531	5.4769		1.9531	1.6218
62.5	47.187	1.72333	62.5	38.7128	3.29931	62.5	11.8185	2.89101		3.9063	14.6327		3.9063	9.7221		3.9063	2.8939
125	52.3161	4.31785	125	39.4158	3.18496	125	13.133	3.99655		5.8594	19.4128		5.8594	13.1092		5.8594	3.9183
250	54.1548	4.35424	250	42.683	3.91804	250	12.5799	2.87089		7.8125	23.2025		7.8125	15.8744		7.8125	4.7609
500	53.9426	4.85089	500	39.1643	2.47209	500	12.2108	2.7791		9.7656	26.2809		9.7656	18.1746		9.7656	5.4663
										11.7188	28.8309		11.7188	20.118		11.7188	6.0653
										13.6719	30.978		13.6719	21.7817		13.6719	6.5805
										15.625	32.8105		15.625	23.2219		15.625	7.0281
Values given are Mean values										17.5781	34.3929		17.5781	24.4809		17.5781	7.4208
										19.5313	35.7731		19.5313	25.5909		19.5313	7.768
										21.4844	36.9876		21.4844	26.5768		21.4844	8.0771
										23.4375	38.0645		23.4375	27.4583		23.4375	8.3542
Michaelis-Menten Curve-fitting parameters										25.3906	39.026		25.3906	28.2513		25.3906	8.604
Equation: Ligand Binding, one site saturation										27.3438	39.8896		27.3438	28.9683		27.3438	8.8303
f = Bmax*abs(x)/(Kd + abs(x))										29.2969	40.6696		29.2969	29.6198		29.2969	9.0363
0 µM IMT1B										31.25	41.3775		31.25	30.2144		31.25	9.2245
R	Rsqr	Adj Rsqr	Standard Error of Estimate							33.2031	42.0229		33.2031	30.7592		33.2031	9.3973
										35.1563	42.6138		35.1563	31.2603		35.1563	9.5564
0.9996	0.9992	0.999		0.6641						37.1094	43.1567		37.1094	31.7226		37.1094	9.7033
										39.0625	43.6573		39.0625	32.1506		39.0625	9.8395
	Coefficient	Std. Error	t	P						41.0156	44.1204		41.0156	32.5479		41.0156	9.9661
										42.9688	44.5499		42.9688	32.9176		42.9688	10.084
Bmax	55.9992	0.5189	107.915	<0.0001						44.9219	44.9495		44.9219	33.2627		44.9219	10.1941
Kd	11.0429	0.8262	13.3656	0.0002						46.875	45.3221		46.875	33.5854		46.875	10.2972
										48.8281	45.6704		48.8281	33.8879		48.8281	10.3939
Analysis of Variance:										50.7813	45.9967		50.7813	34.1719		50.7813	10.4848
										52.7344	46.303		52.7344	34.4393		52.7344	10.5703
Analysis of Variance:										54.6875	46.5912		54.6875	34.6912		54.6875	10.6511
	DF	SS	MS							56.6406	46.8626		56.6406	34.9292		56.6406	10.7273
Regression	2	12502.5	6251.24							58.5938	47.1189		58.5938	35.1543		58.5938	10.7995
Residual	4	1.7642	0.4411							60.5469	47.3612		60.5469	35.3674		60.5469	10.8679
Total	6	12504.3	2084.04							62.5	47.5906		62.5	35.5696		62.5	10.9329
										64.4531	47.8081		64.4531	35.7617		64.4531	10.9946
Corrected for the mean of the observations:										66.4063	48.0147		66.4063	35.9444		66.4063	11.0533
	DF	SS	MS	F	P					68.3594	48.2111		68.3594	36.1184		68.3594	11.1092
Regression	1	2182.83	2182.83	4949.05	<0.0001					70.3125	48.398		70.3125	36.2842		70.3125	11.1626
Residual	4	1.7642	0.4411							72.2656	48.5763		72.2656	36.4425		72.2656	11.2135
Total	5	2184.59	436.918							74.2188	48.7463		74.2188	36.5937		74.2188	11.2622
										76.1719	48.9087		76.1719	36.7384		76.1719	11.3088
Statistical Tests:										78.125	49.064		78.125	36.8769		78.125	11.3534
										80.0781	49.2127		80.0781	37.0096		80.0781	11.3961
Normality Test (Shapiro-Wilk)			Passed	(P = 0.9772)						82.0313	49.3551		82.0313	37.1368		82.0313	11.4372
0.1 µM IMT1B										83.9844	49.4917		83.9844	37.259		83.9844	11.4766
R	Rsqr	Adj Rsqr	Standard Error of Estimate							85.9375	49.6227		85.9375	37.3764		85.9375	11.5144
										87.8906	49.7486		87.8906	37.4892		87.8906	11.5508
0.9896	0.9793	0.9741		2.5978						89.8438	49.8696		89.8438	37.5978		89.8438	11.5859
										91.7969	49.986		91.7969	37.7023		91.7969	11.6196
	Coefficient	Std. Error	t	P						93.75	50.0981		93.75	37.8031		93.75	11.6522
										95.7031	50.2061		95.7031	37.9002		95.7031	11.6835
Bmax	43.2322	2.0887	20.6979	<0.0001						97.6563	50.3102		97.6563	37.9939		97.6563	11.7138
Kd	13.464	4.6093	2.921	0.0432						99.6094	50.4106		99.6094	38.0844		99.6094	11.7431
										101.562	50.5075		101.562	38.1718		101.562	11.7713
Analysis of Variance:										103.516	50.6011		103.516	38.2563		103.516	11.7986
										105.469	50.6916		105.469	38.338		105.469	11.8251
Analysis of Variance:										107.422	50.7791		107.422	38.4171		107.422	11.8506
	DF	SS	MS							109.375	50.8638		109.375	38.4937		109.375	11.8754
Regression	2	7156.49	3578.25							111.328	50.9458		111.328	38.5678		111.328	11.8994
Residual	4	26.994	6.7485							113.281	51.0252		113.281	38.6397		113.281	11.9227
Total	6	7183.48	1197.25							115.234	51.1021		115.234	38.7094		115.234	11.9452
										117.188	51.1767		117.188	38.777		117.188	11.9671
Corrected for the mean of the observations:										119.141	51.249		119.141	38.8426		119.141	11.9884
	DF	SS	MS	F	P					121.094	51.3192		121.094	38.9063		121.094	12.009
Regression	1	1276.84	1276.84	189.204	0.0002					123.047	51.3874		123.047	38.9682		123.047	12.029
Residual	4	26.994	6.7485							125	51.4536		125	39.0284		125	12.0485
Total	5	1303.84	260.768							126.953	51.518		126.953	39.0869		126.953	12.0675
										128.906	51.5805		128.906	39.1437		128.906	12.0859
Statistical Tests:										130.859	51.6413		130.859	39.1991		130.859	12.1038
										132.812	51.7005		132.812	39.2529		132.812	12.1213
Normality Test (Shapiro-Wilk)			Passed	(P = 0.7651)						134.766	51.7581		134.766	39.3053		134.766	12.1383
										136.719	51.8141		136.719	39.3564		136.719	12.1548
W Statistic= 0.9531	Significance Level = 0.0500									138.672	51.8687		138.672	39.4062		138.672	12.171
										140.625	51.9219		140.625	39.4547		140.625	12.1867
Constant Variance Test		Passed	(P = 0.0600)							142.578	51.9737		142.578	39.5019		142.578	12.202
10 µM IMT1B										144.531	52.0243		144.531	39.5481		144.531	12.217
R	Rsqr	Adj Rsqr	Standard Error of Estimate							146.484	52.0736		146.484	39.593		146.484	12.2316
										148.438	52.1216		148.438	39.6369		148.438	12.2458
0.9814	0.9631	0.9538		1.0843						150.391	52.1686		150.391	39.6798		150.391	12.2597
										152.344	52.2143		152.344	39.7216		152.344	12.2733
	Coefficient	Std. Error	t	P						154.297	52.2591		154.297	39.7625		154.297	12.2866
										156.25	52.3027		156.25	39.8024		156.25	12.2996
Bmax	13.4178	0.8793	15.2595	0.0001						158.203	52.3454		158.203	39.8415		158.203	12.3122
Kd	14.2055	6.3769	2.2277	0.0898						160.156	52.3871		160.156	39.8796		160.156	12.3246
										162.109	52.4278		162.109	39.9169		162.109	12.3367
Analysis of Variance:										164.062	52.4676		164.062	39.9534		164.062	12.3486
										166.016	52.5066		166.016	39.9891		166.016	12.3601
Analysis of Variance:										167.969	52.5447		167.969	40.024		167.969	12.3715
	DF	SS	MS							169.922	52.582		169.922	40.0581		169.922	12.3826
Regression	2	681.21	340.605							171.875	52.6185		171.875	40.0916		171.875	12.3935
Residual	4	4.7024	1.1756							173.828	52.6542		173.828	40.1243		173.828	12.4041
Total	6	685.912	114.319							175.781	52.6892		175.781	40.1564		175.781	12.4145
										177.734	52.7234		177.734	40.1878		177.734	12.4247
Corrected for the mean of the observations:										179.688	52.757		179.688	40.2186		179.688	12.4347
	DF	SS	MS	F	P					181.641	52.7898		181.641	40.2488		181.641	12.4445
Regression	1	122.606	122.606	104.291	0.0005					183.594	52.822		183.594	40.2784		183.594	12.4541
Residual	4	4.7024	1.1756							185.547	52.8536		185.547	40.3074		185.547	12.4636
Total	5	127.309	25.4617							187.5	52.8845		187.5	40.3358		187.5	12.4728
										189.453	52.9149		189.453	40.3637		189.453	12.4819
Statistical Tests:										191.406	52.9446		191.406	40.391		191.406	12.4908
										193.359	52.9738		193.359	40.4178		193.359	12.4995
Normality Test (Shapiro-Wilk)			Passed	(P = 0.4169)						195.312	53.0025		195.312	40.4442		195.312	12.508
										197.266	53.0306		197.266	40.47		197.266	12.5164
W Statistic= 0.9070	Significance Level = 0.0500									199.219	53.0581		199.219	40.4954		199.219	12.5247
										201.172	53.0852		201.172	40.5203		201.172	12.5328
Constant Variance Test		Passed	(P = 0.0600)							203.125	53.1118		203.125	40.5447		203.125	12.5407
										205.078	53.1379		205.078	40.5687		205.078	12.5486
										207.031	53.1635		207.031	40.5923		207.031	12.5562
										208.984	53.1887		208.984	40.6155		208.984	12.5638
										210.938	53.2134		210.938	40.6383		210.938	12.5712
										212.891	53.2377		212.891	40.6607		212.891	12.5785
										214.844	53.2616		214.844	40.6827		214.844	12.5856
										216.797	53.285		216.797	40.7043		216.797	12.5926
										218.75	53.3081		218.75	40.7256		218.75	12.5996
										220.703	53.3308		220.703	40.7465		220.703	12.6064
										222.656	53.3531		222.656	40.767		222.656	12.6131
										224.609	53.375		224.609	40.7873		224.609	12.6196
										226.562	53.3966		226.562	40.8072		226.562	12.6261
										228.516	53.4178		228.516	40.8267		228.516	12.6325
										230.469	53.4387		230.469	40.846		230.469	12.6388
										232.422	53.4592		232.422	40.8649		232.422	12.6449
										234.375	53.4794		234.375	40.8836		234.375	12.651
										236.328	53.4993		236.328	40.902		236.328	12.657
										238.281	53.5189		238.281	40.92		238.281	12.6629
										240.234	53.5382		240.234	40.9378		240.234	12.6687
										242.188	53.5572		242.188	40.9554		242.188	12.6744
										244.141	53.5759		244.141	40.9726		244.141	12.68
										246.094	53.5943		246.094	40.9896		246.094	12.6855
										248.047	53.6124		248.047	41.0064		248.047	12.691
										250	53.6303		250	41.0229		250	12.6963
										251.953	53.6479		251.953	41.0391		251.953	12.7016
										253.906	53.6652		253.906	41.0552		253.906	12.7069
										255.859	53.6823		255.859	41.071		255.859	12.712
										257.812	53.6991		257.812	41.0865		257.812	12.7171
										259.766	53.7157		259.766	41.1018		259.766	12.7221
										261.719	53.732		261.719	41.117		261.719	12.727
										263.672	53.7482		263.672	41.1319		263.672	12.7318
										265.625	53.7641		265.625	41.1466		265.625	12.7366
										267.578	53.7797		267.578	41.1611		267.578	12.7413
										269.531	53.7952		269.531	41.1754		269.531	12.746
										271.484	53.8104		271.484	41.1895		271.484	12.7506
										273.438	53.8254		273.438	41.2034		273.438	12.7551
										275.391	53.8403		275.391	41.2171		275.391	12.7596
										277.344	53.8549		277.344	41.2306		277.344	12.764
										279.297	53.8693		279.297	41.244		279.297	12.7684
										281.25	53.8835		281.25	41.2572		281.25	12.7726
										283.203	53.8976		283.203	41.2702		283.203	12.7769
										285.156	53.9114		285.156	41.283		285.156	12.7811
										287.109	53.9251		287.109	41.2957		287.109	12.7852
										289.062	53.9386		289.062	41.3082		289.062	12.7893
										291.016	53.9519		291.016	41.3205		291.016	12.7933
										292.969	53.9651		292.969	41.3327		292.969	12.7973
										294.922	53.9781		294.922	41.3447		294.922	12.8012
										296.875	53.9909		296.875	41.3566		296.875	12.8051
										298.828	54.0036		298.828	41.3683		298.828	12.8089
										300.781	54.0161		300.781	41.3799		300.781	12.8126
										302.734	54.0284		302.734	41.3913		302.734	12.8164
										304.688	54.0406		304.688	41.4026		304.688	12.8201
										306.641	54.0526		306.641	41.4138		306.641	12.8237
										308.594	54.0645		308.594	41.4248		308.594	12.8273
										310.547	54.0763		310.547	41.4357		310.547	12.8308
										312.5	54.0879		312.5	41.4465		312.5	12.8344
										314.453	54.0994		314.453	41.4571		314.453	12.8378
										316.406	54.1107		316.406	41.4676		316.406	12.8412
										318.359	54.1219		318.359	41.478		318.359	12.8446
										320.312	54.1329		320.312	41.4883		320.312	12.848
										322.266	54.1439		322.266	41.4984		322.266	12.8513
										324.219	54.1547		324.219	41.5085		324.219	12.8546
										326.172	54.1654		326.172	41.5184		326.172	12.8578
										328.125	54.1759		328.125	41.5282		328.125	12.861
										330.078	54.1864		330.078	41.5379		330.078	12.8641
										332.031	54.1967		332.031	41.5474		332.031	12.8673
										333.984	54.2069		333.984	41.5569		333.984	12.8704
										335.938	54.217		335.938	41.5663		335.938	12.8734
										337.891	54.227		337.891	41.5755		337.891	12.8764
										339.844	54.2368		339.844	41.5847		339.844	12.8794
										341.797	54.2466		341.797	41.5938		341.797	12.8824
										343.75	54.2562		343.75	41.6027		343.75	12.8853
										345.703	54.2658		345.703	41.6116		345.703	12.8882
										347.656	54.2752		347.656	41.6203		347.656	12.891
										349.609	54.2845		349.609	41.629		349.609	12.8939
										351.562	54.2938		351.562	41.6376		351.562	12.8967
										353.516	54.3029		353.516	41.6461		353.516	12.8994
										355.469	54.312		355.469	41.6545		355.469	12.9022
										357.422	54.3209		357.422	41.6628		357.422	12.9049
										359.375	54.3298		359.375	41.671		359.375	12.9076
										361.328	54.3385		361.328	41.6791		361.328	12.9102
										363.281	54.3472		363.281	41.6872		363.281	12.9128
										365.234	54.3557		365.234	41.6952		365.234	12.9154
										367.188	54.3642		367.188	41.7031		367.188	12.918
										369.141	54.3726		369.141	41.7109		369.141	12.9206
										371.094	54.3809		371.094	41.7186		371.094	12.9231
										373.047	54.3892		373.047	41.7262		373.047	12.9256
										375	54.3973		375	41.7338		375	12.928
										376.953	54.4054		376.953	41.7413		376.953	12.9305
										378.906	54.4134		378.906	41.7487		378.906	12.9329
										380.859	54.4213		380.859	41.7561		380.859	12.9353
										382.812	54.4291		382.812	41.7633		382.812	12.9377
										384.766	54.4368		384.766	41.7705		384.766	12.94
										386.719	54.4445		386.719	41.7777		386.719	12.9424
										388.672	54.4521		388.672	41.7847		388.672	12.9447
										390.625	54.4596		390.625	41.7917		390.625	12.9469
										392.578	54.4671		392.578	41.7987		392.578	12.9492
										394.531	54.4745		394.531	41.8055		394.531	12.9514
										396.484	54.4818		396.484	41.8123		396.484	12.9537
										398.438	54.489		398.438	41.8191		398.438	12.9559
										400.391	54.4962		400.391	41.8257		400.391	12.958
										402.344	54.5033		402.344	41.8323		402.344	12.9602
										404.297	54.5103		404.297	41.8389		404.297	12.9623
										406.25	54.5173		406.25	41.8454		406.25	12.9644
										408.203	54.5242		408.203	41.8518		408.203	12.9665
										410.156	54.531		410.156	41.8582		410.156	12.9686
										412.109	54.5378		412.109	41.8645		412.109	12.9707
										414.062	54.5445		414.062	41.8707		414.062	12.9727
										416.016	54.5512		416.016	41.8769		416.016	12.9747
										417.969	54.5578		417.969	41.883		417.969	12.9767
										419.922	54.5643		419.922	41.8891		419.922	12.9787
										421.875	54.5708		421.875	41.8951		421.875	12.9807
										423.828	54.5772		423.828	41.9011		423.828	12.9826
										425.781	54.5835		425.781	41.907		425.781	12.9846
										427.734	54.5898		427.734	41.9129		427.734	12.9865
										429.688	54.5961		429.688	41.9187		429.688	12.9884
										431.641	54.6023		431.641	41.9245		431.641	12.9903
										433.594	54.6084		433.594	41.9302		433.594	12.9921
										435.547	54.6145		435.547	41.9359		435.547	12.994
										437.5	54.6205		437.5	41.9415		437.5	12.9958
										439.453	54.6265		439.453	41.947		439.453	12.9976
										441.406	54.6324		441.406	41.9526		441.406	12.9994
										443.359	54.6383		443.359	41.958		443.359	13.0012
										445.312	54.6441		445.312	41.9635		445.312	13.003
										447.266	54.6499		447.266	41.9688		447.266	13.0047
										449.219	54.6556		449.219	41.9742		449.219	13.0065
										451.172	54.6613		451.172	41.9795		451.172	13.0082
										453.125	54.6669		453.125	41.9847		453.125	13.0099
										455.078	54.6725		455.078	41.9899		455.078	13.0116
										457.031	54.6781		457.031	41.9951		457.031	13.0133
										458.984	54.6835		458.984	42.0002		458.984	13.015
										460.938	54.689		460.938	42.0052		460.938	13.0166
										462.891	54.6944		462.891	42.0103		462.891	13.0183
										464.844	54.6997		464.844	42.0153		464.844	13.0199
										466.797	54.7051		466.797	42.0202		466.797	13.0215
										468.75	54.7103		468.75	42.0251		468.75	13.0231
										470.703	54.7156		470.703	42.03		470.703	13.0247
										472.656	54.7207		472.656	42.0348		472.656	13.0263
										474.609	54.7259		474.609	42.0396		474.609	13.0278
										476.562	54.731		476.562	42.0444		476.562	13.0294
										478.516	54.736		478.516	42.0491		478.516	13.0309
										480.469	54.7411		480.469	42.0538		480.469	13.0325
										482.422	54.746		482.422	42.0584		482.422	13.034
										484.375	54.751		484.375	42.063		484.375	13.0355
										486.328	54.7559		486.328	42.0676		486.328	13.037
										488.281	54.7607		488.281	42.0721		488.281	13.0384
										490.234	54.7656		490.234	42.0766		490.234	13.0399
										492.188	54.7704		492.188	42.0811		492.188	13.0414
										494.141	54.7751		494.141	42.0855		494.141	13.0428
										496.094	54.7798		496.094	42.0899		496.094	13.0443
										498.047	54.7845		498.047	42.0943		498.047	13.0457
										500	54.7891		500	42.0986		500	13.0471

## Sheet: 1 d
Linear LSP			Supercoiled LSP
[IMT1B]	Band Intensity (A. U.)		[IMT1B]	Band Intensity (A. U.)
0.0001	17446.5		0.0001	28137.8
0.001	16502.4		0.001	28526.8
0.01	12026.4		0.01	27769.2
0.1	5231.69		0.1	11906.8
1	1751.83		1	6638.47
10	498.27		10	2548.31
Values given are Mean values

## Sheet: 1 e
0 µM IMT1B				10 µM IMT1B				Fit to 0 µM IMT1B			Fit to 10 µM IMT1B
[POLRMT] (nM)	Fraction bound	SD		[POLRMT] (nM)	Fraction bound	SD		[POLRMT] (nM)	Fraction bound		[POLRMT] (nM)	Fraction bound
0.452	0.0164	0.029		0.452	0.016	0.0073333		0.1	0		0.1	0
0.904	-0.0212	0.0212		0.904	0.0421	0.0123		0.113	0.00012518		0.115	0
1.809	0.0171	0.0034633		1.809	-0.0254	0.0107		0.127	0.00025036		0.133	0
3.617	0.0093885	0.0049967		3.617	0.0698	0.0157		0.143	0.00037554		0.153	0
7.234	0.0815	0.0132		7.234	-0.0068795	0.0143		0.161	0.00056331		0.177	0.00010749
14.469	0.1728	0.0177		14.469	0.0418	0.0207		0.182	0.00075108		0.204	0.00010749
28.938	0.1572	0.0323		28.938	-0.0711	0.0233		0.205	0.00093885		0.236	0.00010749
57.875	0.3523	0.0319		57.875	0.0969	0.0036667		0.231	0.0011892		0.272	0.00021498
115.75	0.5343	0.0689		115.75	0.2227	0.0167		0.261	0.0014396		0.313	0.00021498
231.5	0.7144	0.1077		231.5	0.3241	0.043		0.294	0.0017525		0.361	0.00032248
463	0.8054	0.1283		463	0.4976	0.038		0.331	0.0020655		0.417	0.00042997
926	0.9184	0.0519		926	0.6216	0.0247		0.373	0.002441		0.481	0.00053746
1852	0.9443	0.0312		1852	0.7242	0.0671		0.421	0.0028791		0.555	0.00053746
								0.474	0.0033173		0.64	0.00075245
								0.535	0.0038806		0.738	0.00085994
Values given are Mean values								0.603	0.0044439		0.851	0.00096743
								0.679	0.0051324		0.982	0.0011824
								0.766	0.005946		1.132	0.0013974
								0.863	0.0067597		1.306	0.0016124
								0.973	0.0077612		1.507	0.0018274
								1.096	0.0088252		1.738	0.0021498
								1.236	0.0101		2.004	0.0025798
								1.393	0.0115		2.312	0.0029023
								1.57	0.013		2.667	0.0034398
								1.77	0.0147		3.076	0.0039772
								1.995	0.0167		3.548	0.0046222
								2.249	0.0189		4.093	0.0053746
								2.535	0.0213		4.721	0.0061271
								2.858	0.0242		5.445	0.0070945
								3.221	0.0272		6.281	0.0082769
								3.631	0.0307		7.244	0.0095668
								4.093	0.0346		8.356	0.011
								4.613	0.039		9.638	0.0127
								5.2	0.0439		11.117	0.0146
								5.861	0.0493		12.823	0.0169
								6.607	0.0554		14.791	0.0195
								7.447	0.0622		17.061	0.0224
								8.395	0.0697		19.679	0.0257
								9.462	0.078		22.699	0.0296
								10.666	0.0873		26.182	0.034
								12.023	0.0975		30.2	0.039
								13.552	0.1088		34.834	0.0448
								15.276	0.1212		40.179	0.0514
								17.219	0.1349		46.345	0.0588
								19.409	0.1499		53.456	0.0673
								21.878	0.1662		61.66	0.0769
								24.66	0.1839		71.121	0.0876
								27.797	0.2031		82.035	0.0998
								31.333	0.2238		94.624	0.1134
								35.318	0.2459		109.144	0.1287
								39.811	0.2696		125.893	0.1455
								44.875	0.2946		145.211	0.1644
								50.582	0.321		167.494	0.185
								57.016	0.3487		193.197	0.2077
								64.269	0.3774		222.844	0.2323
								72.444	0.4071		257.04	0.2588
								81.658	0.4376		296.483	0.2873
								92.045	0.4685		341.979	0.3176
								103.753	0.4997		394.457	0.3496
								116.95	0.531		454.988	0.383
								131.826	0.5621		524.807	0.4175
								148.594	0.5926		605.341	0.453
								167.494	0.6225		698.232	0.4889
								188.799	0.6515		805.378	0.5249
								212.814	0.6795		928.966	0.5607
								239.883	0.7061		1071.52	0.5959
								270.396	0.7316		1235.95	0.6302
								304.789	0.7555		1425.61	0.6633
								343.558	0.778		1644.37	0.6949
								387.258	0.799		1896.71	0.7248
								436.516	0.8186		2187.76	0.7529
								492.04	0.8366		2523.48	0.779
								554.626	0.8532		2910.72	0.8031
								625.173	0.8684		3357.38	0.8252
								704.693	0.8823		3872.58	0.8454
								794.328	0.895		4466.84	0.8637
								895.365	0.9066		5152.29	0.8803
								1009.25	0.917		5942.92	0.8951
								1137.63	0.9265		6854.88	0.9084
								1282.33	0.935		7906.79	0.9202
								1445.44	0.9427		9120.11	0.9307
								1629.3	0.9496		10519.6	0.94
								1836.54	0.9557		12133.9	0.9482
								2070.14	0.9613		13995.9	0.9554
								2333.46	0.9663		16143.6	0.9617
								2630.27	0.9707		18620.9	0.9673
								2964.83	0.9747		21478.3	0.9723
								3341.95	0.9782		24774.2	0.9765
								3767.04	0.9814		28575.9	0.9802
								4246.2	0.9842		32961	0.9836
								4786.3	0.9868		38018.9	0.9863
								5395.11	0.989		43853.1	0.9888
								6081.35	0.991		50582.5	0.991
								6854.88	0.9928		58344.5	0.9929
								7726.81	0.9944		67297.7	0.9945
								8709.64	0.9958		77624.7	0.9959
								9817.48	0.9971		89536.5	0.9972
								11066.2	0.9981		103276	0.9983
								12473.8	0.9991		119124	0.9991
								14060.5	1		137404	1

## Sheet: 1 f
	ND1							CytB
DMSO	1.1362	1.15982	1.26482	0.766473	0.672683			1.18652	1.05402	1.17101	0.816112	0.772339
10uM	0.25221	0.139236	0.133828					0.48315	0.37478	0.321866
5uM	0.210886	0.147074	0.249037					0.374581	0.403533	0.428688
1uM	0.197086	0.177	0.129658					0.376141	0.37461	0.343315
0.5uM	0.316803	0.200035	0.221567					0.507493	0.41133	0.450181
0.2uM	0.350886	0.372325	0.420318					0.563088	0.723332	0.686758
0.1uM	0.33671	0.330194	0.124954	0.217337	0.220012			0.546431	0.563873	0.267104	0.346047	0.346937
0.05uM	0.553855	0.556739	0.604418					0.698275	0.791039	0.81685
0.01uM	0.944132	1.11408	0.886737					0.960054	1.27602	0.922711
Ordinary Two-way ANOVA, Sidak's multiple comparison test
ANOVA table	SS (Type III)	DF	MS	F (DFn, DFd)	P value
Interaction	0.1117	8	0.01396	F (8, 44) = 0,8717	P=0,5473
Row Factor	5.422	8	0.6777	F (8, 44) = 42,32	P<0,0001
Column Factor	0.4328	1	0.4328	F (1, 44) = 27,02	P<0,0001
Residual	0.7047	44	0.01602
Within each column, compare rows (simple effects within columns)
Number of families	2
Number of comparisons per family	8
Alpha	0.05
Sidak's multiple comparisons test	Predicted (LS) mean diff,	95,00% CI of diff,	Significant?	Summary	Adjusted P Value
ND1
DMSO vs. 10uM	0.8249	0,5602 to 1,090	Yes	****	<0,0001
DMSO vs. 5uM	0.7977	0,5330 to 1,062	Yes	****	<0,0001
DMSO vs. 1uM	0.8321	0,5674 to 1,097	Yes	****	<0,0001
DMSO vs. 0.5uM	0.7539	0,4892 to 1,019	Yes	****	<0,0001
DMSO vs. 0.2uM	0.6188	0,3541 to 0,8835	Yes	****	<0,0001
DMSO vs. 0.1uM	0.7542	0,5249 to 0,9834	Yes	****	<0,0001
DMSO vs. 0.05uM	0.4283	0,1637 to 0,6930	Yes	***	0.0003
DMSO vs. 0.01uM	0.01835	-0,2463 to 0,2830	No	ns	>0,9999
CytB
DMSO vs. 10uM	0.6067	0,3421 to 0,8714	Yes	****	<0,0001
DMSO vs. 5uM	0.5977	0,3331 to 0,8624	Yes	****	<0,0001
DMSO vs. 1uM	0.6353	0,3706 to 0,9000	Yes	****	<0,0001
DMSO vs. 0.5uM	0.5437	0,2790 to 0,8083	Yes	****	<0,0001
DMSO vs. 0.2uM	0.3423	0,07760 to 0,6069	Yes	**	0.0047
DMSO vs. 0.1uM	0.5859	0,3567 to 0,8151	Yes	****	<0,0001
DMSO vs. 0.05uM	0.2313	-0,03340 to 0,4960	No	ns	0.1219
DMSO vs. 0.01uM	-0.05293	-0,3176 to 0,2117	No	ns	0.9988
Test details	Predicted (LS) mean 1	Predicted (LS) mean 2	Predicted (LS) mean diff,	SE of diff,	N1	N2	t	DF
ND1
DMSO vs. 10uM	1	0.1751	0.8249	0.09242	5	3	8.926	44
DMSO vs. 5uM	1	0.2023	0.7977	0.09242	5	3	8.631	44
DMSO vs. 1uM	1	0.1679	0.8321	0.09242	5	3	9.003	44
DMSO vs. 0.5uM	1	0.2461	0.7539	0.09242	5	3	8.157	44
DMSO vs. 0.2uM	1	0.3812	0.6188	0.09242	5	3	6.696	44
DMSO vs. 0.1uM	1	0.2458	0.7542	0.08004	5	5	9.422	44
DMSO vs. 0.05uM	1	0.5717	0.4283	0.09242	5	3	4.635	44
DMSO vs. 0.01uM	1	0.9816	0.01835	0.09242	5	3	0.1986	44
CytB
DMSO vs. 10uM	1	0.3933	0.6067	0.09242	5	3	6.565	44
DMSO vs. 5uM	1	0.4023	0.5977	0.09242	5	3	6.467	44
DMSO vs. 1uM	1	0.3647	0.6353	0.09242	5	3	6.874	44
DMSO vs. 0.5uM	1	0.4563	0.5437	0.09242	5	3	5.882	44
DMSO vs. 0.2uM	1	0.6577	0.3423	0.09242	5	3	3.703	44
DMSO vs. 0.1uM	1	0.4141	0.5859	0.08004	5	5	7.32	44
DMSO vs. 0.05uM	1	0.7687	0.2313	0.09242	5	3	2.502	44
DMSO vs. 0.01uM	1	1.053	-0.05293	0.09242	5	3	0.5727	44

## Sheet: 1 g
	COX1
DMSO	1.4751	0.481324	1.43237	0.389566	1.22164
24	0.645541	0.894573	1.56239	1.44822
48	0.557985	0.44069	0.46266
72	0.350119	0.234653	0.390477	0.474583
96	0.35912	0.256609	0.224072	0.41682
