# Supplementary material for: Small-molecule inhibitors of human mitochondrial DNA transcription
Source: Springer Nature journal article supplement (doi:10.1038/s41586-020-03048-z), 2020-12-16
Supplement: MOESM4 [file 41586_2020_3048_MOESM4_ESM.xlsx]

## Sheet: 2 b
L816Q						A821V
0 µM IMT1B			10 µM IMT1B			0 µM IMT1B			10 µM IMT1B
Temperature (°C)	Fnorm (A. U.)		Temperature (°C)	Fnorm (A. U.)		Temperature (°C)	Fnorm (A. U.)		Temperature (°C)	Fnorm (A. U.)
4	0.089		4	0.0886		4	0.1953		4	0.1855
4.5	0.0866		4.5	0.0859		4.5	0.1901		4.5	0.1807
5	0.0842		5	0.0831		5	0.185		5	0.1758
5.5	0.0817		5.5	0.0804		5.5	0.1798		5.5	0.1709
6	0.0793		6	0.0776		6	0.1747		6	0.1661
6.5	0.0769		6.5	0.0749		6.5	0.1695		6.5	0.1612
7	0.0744		7	0.0721		7	0.1644		7	0.1564
7.5	0.072		7.5	0.0694		7.5	0.1595		7.5	0.1517
8	0.0697		8	0.0668		8	0.1547		8	0.1473
8.5	0.0674		8.5	0.0645		8.5	0.1501		8.5	0.1432
9	0.0652		9	0.0622		9	0.1457		9	0.1395
9.5	0.063		9.5	0.06		9.5	0.1412		9.5	0.1361
10	0.0608		10	0.058		10	0.1368		10	0.1328
10.5	0.0585		10.5	0.0561		10.5	0.1326		10.5	0.1297
11	0.0563		11	0.0541		11	0.1285		11	0.1265
11.5	0.0541		11.5	0.0523		11.5	0.1246		11.5	0.1232
12	0.052		12	0.0505		12	0.1207		12	0.1199
12.5	0.0502		12.5	0.0488		12.5	0.117		12.5	0.1168
13	0.0485		13	0.0471		13	0.1135		13	0.1137
13.5	0.0469		13.5	0.0453		13.5	0.11		13.5	0.1107
14	0.0453		14	0.0437		14	0.1067		14	0.1079
14.5	0.0439		14.5	0.0421		14.5	0.1033		14.5	0.1051
15	0.0425		15	0.0405		15	0.1		15	0.1022
15.5	0.0412		15.5	0.0392		15.5	0.0967		15.5	0.0995
16	0.04		16	0.0382		16	0.0934		16	0.0969
16.5	0.0388		16.5	0.0372		16.5	0.0903		16.5	0.0943
17	0.0376		17	0.0362		17	0.0874		17	0.0918
17.5	0.0362		17.5	0.0353		17.5	0.0847		17.5	0.0892
18	0.0348		18	0.0343		18	0.082		18	0.0868
18.5	0.0334		18.5	0.033		18.5	0.0797		18.5	0.0844
19	0.0319		19	0.0319		19	0.0774		19	0.082
19.5	0.0306		19.5	0.0306		19.5	0.0749		19.5	0.0796
20	0.0293		20	0.0293		20	0.0725		20	0.0773
20.5	0.0281		20.5	0.028		20.5	0.07		20.5	0.0749
21	0.0269		21	0.0268		21	0.0674		21	0.0724
21.5	0.0259		21.5	0.0255		21.5	0.0649		21.5	0.0701
22	0.0249		22	0.0244		22	0.0623		22	0.0681
22.5	0.0239		22.5	0.0232		22.5	0.0598		22.5	0.066
23	0.0232		23	0.0221		23	0.0576		23	0.0642
23.5	0.0223		23.5	0.021		23.5	0.0554		23.5	0.0625
24	0.0212		24	0.0198		24	0.0534		24	0.0607
24.5	0.02		24.5	0.0187		24.5	0.0514		24.5	0.0588
25	0.019		25	0.0176		25	0.0496		25	0.0569
25.5	0.0179		25.5	0.0165		25.5	0.0477		25.5	0.055
26	0.0168		26	0.0155		26	0.0458		26	0.053
26.5	0.0159		26.5	0.0146		26.5	0.0439		26.5	0.0509
27	0.015		27	0.0136		27	0.0422		27	0.049
27.5	0.0142		27.5	0.0126		27.5	0.0404		27.5	0.047
28	0.0133		28	0.0116		28	0.0384		28	0.0449
28.5	0.0125		28.5	0.0107		28.5	0.0368		28.5	0.043
29	0.0116		29	0.0097042		29	0.0351		29	0.0411
29.5	0.0107		29.5	0.0087689		29.5	0.0333		29.5	0.039
30	0.009596		30	0.0078336		30	0.0316		30	0.0371
30.5	0.008678		30.5	0.0069579		30.5	0.0301		30.5	0.0353
31	0.007817		31	0.006118		31	0.0285		31	0.0337
31.5	0.007053		31.5	0.0053018		31.5	0.027		31.5	0.0321
32	0.0065456		32	0.0045691		32	0.0256		32	0.0309
32.5	0.0062149		32.5	0.0040032		32.5	0.0244		32.5	0.0296
33	0.0058728		33	0.003473		33	0.0234		33	0.0283
33.5	0.0055193		33.5	0.0030858		33.5	0.0225		33.5	0.027
34	0.0051486		34	0.0028416		34	0.0218		34	0.0258
34.5	0.0048636		34.5	0.002639		34.5	0.021		34.5	0.0246
35	0.0045785		35	0.0024365		35	0.0204		35	0.0237
35.5	0.0043504		35.5	0.0022995		35.5	0.02		35.5	0.023
36	0.0042421		36	0.0020612		36	0.0197		36	0.0223
36.5	0.0042421		36.5	0.0018825		36.5	0.0196		36.5	0.0216
37	0.0041166		37	0.0018765		37	0.0198		37	0.0209
37.5	0.0041451		37.5	0.0019182		37.5	0.0203		37.5	0.0202
38	0.0042136		38	0.0018765		38	0.021		38	0.0197
38.5	0.0041737		38.5	0.0021029		38.5	0.022		38.5	0.0196
39	0.0041622		39	0.0022875		39	0.0233		39	0.0199
39.5	0.0041908		39.5	0.0023233		39.5	0.0247		39.5	0.0205
40	0.0041166		40	0.0024841		40	0.0261		40	0.0213
40.5	0.0039855		40.5	0.0027701		40.5	0.0279		40.5	0.0224
41	0.0039513		41	0.0028892		41	0.0298		41	0.0237
41.5	0.0039285		41.5	0.0029667		41.5	0.0317		41.5	0.0251
42	0.0038487		42	0.0031513		42	0.034		42	0.0265
42.5	0.0037517		42.5	0.0032466		42.5	0.0365		42.5	0.0282
43	0.0037232		43	0.0034968		43	0.0392		43	0.0299
43.5	0.0037859		43.5	0.0040568		43.5	0.0422		43.5	0.0317
44	0.0039114		44	0.0049444		44	0.0456		44	0.0339
44.5	0.0044701		44.5	0.0059333		44.5	0.0494		44.5	0.0363
45	0.0053995		45	0.007226		45	0.0536		45	0.0391
45.5	0.0066824		45.5	0.008614		45.5	0.0586		45.5	0.0423
46	0.0082846		46	0.0099127		46	0.0644		46	0.046
46.5	0.0103		46.5	0.0115		46.5	0.0709		46.5	0.05
47	0.0124		47	0.0135		47	0.0781		47	0.0546
47.5	0.0148		47.5	0.0159		47.5	0.0858		47.5	0.0598
48	0.0177		48	0.019		48	0.0938		48	0.0654
48.5	0.0212		48.5	0.023		48.5	0.1019		48.5	0.0717
49	0.0253		49	0.0277		49	0.1101		49	0.0787
49.5	0.0305		49.5	0.0333		49.5	0.1184		49.5	0.0867
50	0.0369		50	0.0399		50	0.1269		50	0.0959
50.5	0.0444		50.5	0.048		50.5	0.1358		50.5	0.1064
51	0.0535		51	0.0576		51	0.1455		51	0.1184
51.5	0.0646		51.5	0.0692		51.5	0.1562		51.5	0.1323
52	0.0779		52	0.0831		52	0.1683		52	0.1484
52.5	0.0942		52.5	0.0999		52.5	0.1824		52.5	0.167
53	0.1141		53	0.1202		53	0.1992		53	0.1887
53.5	0.1387		53.5	0.145		53.5	0.2196		53.5	0.214
54	0.1689		54	0.1753		54	0.2445		54	0.2439
54.5	0.206		54.5	0.2126		54.5	0.2756		54.5	0.2793
55	0.2514		55	0.2581		55	0.3143		55	0.3222
55.5	0.3066		55.5	0.3133		55.5	0.3621		55.5	0.3741
56	0.3727		56	0.3794		56	0.4206		56	0.4366
56.5	0.45		56.5	0.4564		56.5	0.4906		56.5	0.5105
57	0.5369		57	0.5424		57	0.5708		57	0.594
57.5	0.63		57.5	0.6336		57.5	0.658		57.5	0.6828
58	0.7231		58	0.7237		58	0.7463		58	0.7705
58.5	0.8089		58.5	0.8058		58.5	0.828		58.5	0.8494
59	0.8809		59	0.8743		59	0.8965		59	0.9131
59.5	0.9355		59.5	0.9267		59.5	0.9475		59.5	0.9586
60	0.9717		60	0.9626		60	0.9801		60	0.9861
60.5	0.9918		60.5	0.9848		60.5	0.9961		60.5	0.9984
61	1		61	0.9966		61	1		61	1
61.5	0.9993		61.5	1		61.5	0.9954		61.5	0.9939
62	0.9913		62	0.9959		62	0.9843		62	0.9818
62.5	0.9769		62.5	0.9846		62.5	0.9677		62.5	0.9647
63	0.9566		63	0.9668		63	0.9471		63	0.9434
63.5	0.9315		63.5	0.9434		63.5	0.9234		63.5	0.919
64	0.903		64	0.9162		64	0.8979		64	0.8927
64.5	0.8726		64.5	0.8865		64.5	0.8721		64.5	0.8654
65	0.8419		65	0.8556		65	0.8469		65	0.8377
65.5	0.8109		65.5	0.8235		65.5	0.8218		65.5	0.8091
66	0.7793		66	0.7904		66	0.7957		66	0.7787
66.5	0.7468		66.5	0.7562		66.5	0.7679		66.5	0.7465
67	0.7133		67	0.7213		67	0.7378		67	0.7131
67.5	0.6787		67.5	0.6858		67.5	0.7056		67.5	0.6787
68	0.6431		68	0.6498		68	0.6718		68	0.6439
68.5	0.6069		68.5	0.6136		68.5	0.6368		68.5	0.6089
69	0.5701		69	0.577		69	0.601		69	0.5739
69.5	0.5326		69.5	0.5401		69.5	0.5647		69.5	0.5383
70	0.4946		70	0.5027		70	0.5281		70	0.5021
70.5	0.4564		70.5	0.4652		70.5	0.491		70.5	0.4655
71	0.4181		71	0.4276		71	0.4535		71	0.4286
71.5	0.3799		71.5	0.3903		71.5	0.4158		71.5	0.3918
72	0.3426		72	0.3534		72	0.3778		72	0.3554
72.5	0.3065		72.5	0.3175		72.5	0.34		72.5	0.3199
73	0.2718		73	0.2828		73	0.3028		73	0.286
73.5	0.2391		73.5	0.2503		73.5	0.2673		73.5	0.2539
74	0.209		74	0.2201		74	0.234		74	0.224
74.5	0.1817		74.5	0.1928		74.5	0.2039		74.5	0.1968
75	0.1575		75	0.1685		75	0.1775		75	0.1727
75.5	0.1366		75.5	0.1478		75.5	0.155		75.5	0.1514
76	0.1189		76	0.1302		76	0.1363		76	0.1333
76.5	0.1046		76.5	0.1157		76.5	0.1212		76.5	0.1184
77	0.0931		77	0.1042		77	0.1093		77	0.1062
77.5	0.0842		77.5	0.0952		77.5	0.1001		77.5	0.0965
78	0.0774		78	0.0882		78	0.0931		78	0.0891
78.5	0.0723		78.5	0.0828		78.5	0.0877		78.5	0.0833
79	0.0682		79	0.0787		79	0.0834		79	0.0786
79.5	0.065		79.5	0.0753		79.5	0.0799		79.5	0.0748
80	0.0622		80	0.0723		80	0.0768		80	0.0715
80.5	0.0594		80.5	0.0696		80.5	0.0738		80.5	0.0684
81	0.0567		81	0.0669		81	0.0708		81	0.0657
81.5	0.0538		81.5	0.0639		81.5	0.0677		81.5	0.0632
82	0.0506		82	0.0608		82	0.0644		82	0.0609
82.5	0.0472		82.5	0.0575		82.5	0.0608		82.5	0.0587
83	0.0439		83	0.0541		83	0.0573		83	0.0565
83.5	0.0406		83.5	0.0507		83.5	0.0538		83.5	0.054
84	0.0374		84	0.0474		84	0.0503		84	0.0512
84.5	0.0344		84.5	0.0442		84.5	0.0467		84.5	0.048
85	0.0316		85	0.0412		85	0.0432		85	0.0444
85.5	0.029		85.5	0.0381		85.5	0.0397		85.5	0.0406
86	0.0265		86	0.0352		86	0.0363		86	0.0368
86.5	0.0243		86.5	0.0326		86.5	0.0332		86.5	0.0331
87	0.0224		87	0.0299		87	0.0306		87	0.0298
87.5	0.0206		87.5	0.0274		87.5	0.0284		87.5	0.0269
88	0.0188		88	0.0252		88	0.0264		88	0.0246
88.5	0.0172		88.5	0.0231		88.5	0.0248		88.5	0.0225
89	0.0156		89	0.0211		89	0.0233		89	0.0207
89.5	0.0139		89.5	0.0191		89.5	0.0218		89.5	0.019
90	0.0125		90	0.0172		90	0.0201		90	0.0174
90.5	0.0112		90.5	0.0155		90.5	0.0186		90.5	0.0159
91	0.01		91	0.0137		91	0.0169		91	0.0144
91.5	0.0087008		91.5	0.012		91.5	0.015		91.5	0.0128
92	0.0074977		92	0.0103		92	0.0131		92	0.011
92.5	0.0061065		92.5	0.0086081		92.5	0.0112		92.5	0.0090684
93	0.0046469		93	0.0067554		93	0.0091575		93	0.0069434
93.5	0.0031644		93.5	0.0050099		93.5	0.0070929		93.5	0.0047769
94	0.0019671		94	0.0032824		94	0.0049042		94	0.0029597
94.5	0.00068421		94.5	0.0015667		94.5	0.0026846		94.5	0.0010832
95	0		95	0		95	0		95	0

## Sheet: 2 c
	CTR				10 µM				20 µM				40 µM
WT	1	1	1		0.05	0.08	0.16		0	0.01	0.01		0.02	0.01	-0.04
796#4	1	1	1		1.06	0.95	1.05		1.17	1.02	1.06		1.08	0.96	1.07
796#111		1	1			1.01	0.92			0.9	0.85			0.75	0.78
816#13	1	1	1		1.07	0.96	0.94		1	0.98	1.02		0.73	0.84	0.85
816#114	1	1	1		1.09	0.96	0.96		0.94	0.92	0.88		0.74	0.76	0.72
	Ordinary Two-way ANOVA, Sidak' s multiple comparisons test
	ANOVA table	SS (Type III)	DF	MS	F (DFn, DFd)	P value
	Interaction	1.58	12	0.1317	F (12, 36) = 61,64	P<0,0001
	Row Factor	4.469	4	1.117	F (4, 36) = 523,2	P<0,0001
	Column Factor	0.7769	3	0.259	F (3, 36) = 121,3	P<0,0001
	Residual	0.07689	36	0.002136
Within each row, compare columns (simple effects within rows)
Number of families	5
Number of comparisons per family	3
Alpha	0.05
Sidak's multiple comparisons test	Predicted (LS) mean diff,	95,00% CI of diff,	Significant?	Summary	Adjusted P Value
WT
CTR vs. 10 µM	0.9035	0,8091 to 0,9980	Yes	****	<0,0001
CTR vs. 20 µM	0.9924	0,8979 to 1,087	Yes	****	<0,0001
CTR vs. 40 µM	1.004	0,9098 to 1,099	Yes	****	<0,0001
796#4
CTR vs. 10 µM	-0.01738	-0,1119 to 0,07710	No	ns	0.9563
CTR vs. 20 µM	-0.08561	-0,1801 to 0,008873	No	ns	0.0856
CTR vs. 40 µM	-0.03686	-0,1313 to 0,05763	No	ns	0.7062
796#111
CTR vs. 10 µM	0.03463	-0,08109 to 0,1503	No	ns	0.8413		only n=2
CTR vs. 20 µM	0.1233	0,007532 to 0,2390	Yes	*	0.0338
CTR vs. 40 µM	0.2346	0,1188 to 0,3503	Yes	****	<0,0001
816#13
CTR vs. 10 µM	0.01295	-0,08153 to 0,1074	No	ns	0.981
CTR vs. 20 µM	0.001552	-0,09293 to 0,09604	No	ns	>0,9999
CTR vs. 40 µM	0.1916	0,09713 to 0,2861	Yes	****	<0,0001
816#114
CTR vs. 10 µM	-0.002051	-0,09653 to 0,09243	No	ns	>0,9999
CTR vs. 20 µM	0.08705	-0,007438 to 0,1815	No	ns	0.0786
CTR vs. 40 µM	0.2602	0,1658 to 0,3547	Yes	****	<0,0001
Test details	Predicted (LS) mean 1	Predicted (LS) mean 2	Predicted (LS) mean diff,	SE of diff,	N1	N2	t	DF
WT
CTR vs. 10 µM	1	0.09646	0.9035	0.03773	3	3	23.94	36
CTR vs. 20 µM	1	0.007568	0.9924	0.03773	3	3	26.3	36
CTR vs. 40 µM	1	-0.004282	1.004	0.03773	3	3	26.61	36
796#4
CTR vs. 10 µM	1	1.017	-0.01738	0.03773	3	3	0.4607	36
CTR vs. 20 µM	1	1.086	-0.08561	0.03773	3	3	2.269	36
CTR vs. 40 µM	1	1.037	-0.03686	0.03773	3	3	0.9768	36
796#111
CTR vs. 10 µM	1	0.9654	0.03463	0.04621	2	2	0.7492	36
CTR vs. 20 µM	1	0.8767	0.1233	0.04621	2	2	2.667	36
CTR vs. 40 µM	1	0.7655	0.2346	0.04621	2	2	5.075	36
816#13
CTR vs. 10 µM	1	0.987	0.01295	0.03773	3	3	0.3433	36
CTR vs. 20 µM	1	0.9984	0.001552	0.03773	3	3	0.04113	36
CTR vs. 40 µM	1	0.8084	0.1916	0.03773	3	3	5.078	36
816#114
CTR vs. 10 µM	1	1.002	-0.002051	0.03773	3	3	0.05435	36
CTR vs. 20 µM	1	0.913	0.08705	0.03773	3	3	2.307	36
CTR vs. 40 µM	1	0.7398	0.2602	0.03773	3	3	6.897	36
