# Supplementary material for: Small-molecule inhibitors of human mitochondrial DNA transcription
Source: Springer Nature journal article supplement (doi:10.1038/s41586-020-03048-z), 2020-12-16
Supplement: MOESM5 [file 41586_2020_3048_MOESM5_ESM.xlsx]

## Sheet: 3 a
		DMSO	10µM	1µM	0.1µM	0.01µM	0.001µM	0.00001µM
	0	0.052	0.052	0.052	0.052	0.052	0.052	0.052
	72	1.479	0.761	0.78	1.015	1.411	1.588	1.484
	96	2.906	1.261	1.216	1.559	2.89	2.729	2.988
	168	3.882	0.428	0.4	0.702	3.827	3.765	3.812

## Sheet: 3 b
			DMSO					+IMT1
		0h	0.49	0.44	0.41	0.46	0.46	0.45	0.44	0.37	0.46	0.48
		12h	0.8	0.5	0.81	0.76		0.9	1.04	0.52	0.8
		24h	0.59	0.78	0.96	0.65	0.79	0.65	0.83	0.91	0.45	0.74
		48h	1.7	1.51	1.47	1.09	1.66	1.31	1.06	1.12	0.81	1.17
		72h	1.83	1.99	2.29	1.11	2.3	1.12	1.3	1.2	0.75	1.33
		96h	2.38	2.91	2.84	1.68	3.82	1.21	1.57	1.53	1.02	2
		120h	1.78	3.19	2.84	1.53	3.49	0.96	1.5	1.21	0.86	1.69
		168h	1.78	3.84	3.49	2.09	4.58	0.84	1.51	0.8	0.95	1.94
		216h	1.84	4.2	4.36	2.28	4.59	0.57	0.81	0.25	0.39	1.62

## Sheet: 3 c
	Metabolite levels (mean)
	Compound ID	48h		96h		120h		168h		216h
		Con	IMT	Con	IMT	Con	IMT	Con	IMT	Con	IMT
	ADP	1.2126e+06	2.99754e+06	317871	3.85549e+06	431191	3.67613e+06	480571	3.63013e+06	569607	2.92261e+06
	AMP	65187.3	300217	55195.8	366719	33340.2	413220	40016.9	464293	47914.3	469101
	ATP	6.157e+06	5.22146e+06	6.66578e+06	6.04263e+06	7.33934e+06	5.31907e+06	7.03971e+06	5.05058e+06	7.31685e+06	4.21512e+06
	GDP	122955	360625	29827.3	545551	34667.2	553986	37347.4	658379	43310.3	746556
	GMP	14642.5	96489.2	18451.1	164483	26958.5	173066	23703.4	197767	18148.6	273827
	GTP	2.92107e+06	2.0252e+06	3.39626e+06	2.69953e+06	3.54615e+06	2.2882e+06	3.41119e+06	2.27675e+06	3.54545e+06	1.85817e+06
	UDP	619161	1.52521e+06	164332	1.62386e+06	191409	1.36069e+06	192740	1.23306e+06	187935	852166
	UMP	215645	247648	332207	297598	345445	211774	371908	201817	379699	131389
	UTP	1.69519e+06	1.48034e+06	1.68907e+06	1.53537e+06	1.73177e+06	1.27386e+06	1.62587e+06	1.12552e+06	1.63608e+06	803293
	IMP	1429.04	1829.88	698.838	1259.03	891.219	3681.32	859.469	13173.4	885.325	44492.7

## Sheet: 3 d
	AMP
			DMSO					IMT1
		48h	36956.6	104097	79858.1	39837.8		200251	301380	240102	459136
		96h	49978.7	52249.5	59374.1	59181.1		384415	343819	368506	527415	209442
		120h	48450.7	21140.6	31523	40209.1	25377.7	328264	364649	278696	603650	490840
		168h	33921.8	23614	53448.8	52778	36322	375274	391942	556589	418110	579552
		216h	64400.9	27461.1	62324	48214.9	37170.8	373138	492142	385204	555107	539915
	ATP
			DMSO					IMT1
		48h	6.39531e+06	5.53688e+06	4.48041e+06	8.21539e+06		6.10428e+06	4.08491e+06	4.50681e+06	6.18983e+06
		96h	8.07783e+06	4.63831e+06	7.42768e+06	6.51931e+06		7.46769e+06	4.15413e+06	6.40057e+06	6.95407e+06	5.2367e+06
		120h	8.47693e+06	6.01862e+06	6.08764e+06	7.38593e+06	8.72758e+06	5.68589e+06	4.71129e+06	4.25775e+06	5.72439e+06	6.216e+06
		168h	7.27577e+06	5.37675e+06	5.27525e+06	7.65145e+06	9.61933e+06	6.10068e+06	4.13525e+06	3.70924e+06	4.75266e+06	6.5551e+06
		216h	7.88427e+06	6.21224e+06	5.68833e+06	6.95254e+06	9.84687e+06	5.49282e+06	3.92571e+06	3.13078e+06	3.87174e+06	4.65454e+06

## Sheet: 3 f
Metabolite levels (mean)
	Compound ID	48h		96h		120h		168h		216h
		Con	IMT	Con	IMT	Con	IMT	Con	IMT	Con	IMT
	dATP	117896	65279.7	190858	59029.6	281205	92337.5	275365	73450.5	242626	31723.5
	dCTP	84307.7	47399.3	102132	42625.3	183916	60895.4	171313	49111.8	148117	23081.2
	dTMP	6283.69	11888.2	14980.6	6650.77	8146.84	8342.98	11835.1	7810.73	13544.9	4770.93
	dTTP	172994	104497	279108	99055	401053	128753	401333	94310	359185	41239.3
dATP
		DMSO					IMT1
	48h	95595.2	103289	80572.3	192130		71982.5	53697.7	62761.8	72676.7
	96h	171864	161109	174888	255571		48314.4	47120.2	87419.8	34585.4	77708.2
	120h	225026	251390	289053	235056	405501	70546.4	72978	94174.1	79158.6	144830
	168h	194100	204185	256688	261957	459896	73990.3	44917.9	69245.8	57979.2	121120
	216h	166178	182052	251051	190772	423076	39141.7	23937	28118.4	22441	44979.4

## Sheet: 3 g
	Metabolite levels (mean)
		Compound ID	48h		96h		120h		168h		216h
			Con	IMT	Con	IMT	Con	IMT	Con	IMT	Con	IMT
		Ala	810397742	988052022	1076481081	1081437496	1296226198	880505354	1325806632	833452478	1422610035	572206178
		Arg	87476918	128921210	119833557	160312520	200740513	129881958	194449568	130179233	159124703	84679075
		Asn	138516830	103593922	228399765	114139409	150206622	73279217	143653770	42940944	171370966	27823252
		Asp	56110077	74346386	85149841	65511018	104802035	42844047	112277772	23840498	127396753	12536667
		Cys	322191	454704	666585	826560	1173015	446087	2216963	975995	1477666	574122
		Glu	1570573199	1657691986	1858234287	1713328143	1976460786	1572144833	1917759957	1555243456	1987827395	1245308701
		Gln	1184744981	954494379	810538689	1075086136	1256038301	1118306317	1094626962	1228103684	836589041	819291582
		Gly	113728565	94889008	194810154	135588697	184410750	110022165	188083728	108561076	201402132	68620901
		His	86632318	96007756	149186950	121644929	176890808	102922369	193231085	106722311	189900686	73706026
		Ile	215138407	274751607	359557515	307378507	412634931	268122682	437755698	268459067	458894923	186486879
		Leu	149527107	204746691	245876816	250335598	336493512	225264126	364317469	229284209	383605359	160474149
		Lys	217187699	293207657	355339102	298271259	432718661	283694490	466414040	290382205	501760291	232561279
		Met	42677420	56683699	63882085	67193351	95037611	61460459	94369624	64024163	99696792	45497946
		Phe	141856499	148512670	224160760	169896469	254373567	147781246	266713820	150288631	268348831	104038025
		Pro	435365637	272673175	567484904	324733590	555759238	230120421	590425248	229702465	628884009	146795942
		Ser	5967701	4656978	11449820	6282636	13755125	7023565	15716469	8542671	16867051	5539647
		Thr	178249399	169442763	268009899	178786479	232682983	140445278	233296451	130419647	248140519	92067903
		Trp	28579007	31898631	44104471	40417099	57075687	34384879	61018787	36639986	62870250	25608707
		Tyr	295475593	292623807	415820170	284605783	407069805	287325241	426299804	249200829	450039709	190021586
		Val	225375245	264872014	343762783	302090273	393986536	261695187	404322024	270654655	426421205	190333344
