# Supplementary material for: Small-molecule inhibitors of human mitochondrial DNA transcription
Source: Springer Nature journal article supplement (doi:10.1038/s41586-020-03048-z), 2020-12-16
Supplement: MOESM6 [file 41586_2020_3048_MOESM6_ESM.xlsx]

## Sheet: 4 a
		Group	Day	7	11	13	15	18	20	22	25	27	29	32	34
		A	A1	0.097	0.104	0.23	0.227	0.279	0.337	0.328	0.454	0.604	1.114	1.448	1.615
		vehicle	A2	0.204	0.188	0.278	0.365	0.27	0.216	0.209	0.318	0.547	0.717	0.981	1.213
			A3	0.282	0.277	0.491	0.515	0.561	0.616	0.724	0.6	0.955	0.934	1.318	1.476
			A4	0.3	0.441	0.37	0.319	0.631	0.499	0.666	0.552	0.654	0.814	1.001	1.433
			A5	0.194	0.289	0.338	0.247	0.336	0.462	0.514	0.601	0.847	1.029	1.463	1.582
			A6	0.192	0.243	0.341	0.315	0.231	0.244	0.381	0.354	0.745	0.811	0.831	1.418
			A7	0.168	0.337	0.411	0.429	0.42	0.636	0.625	0.837	1.602				*mice had to be sacrificed after day 27
			A8	0.267	0.391	0.777	0.745	0.999	0.868	1.264	1.171	1.598				*mice had to be sacrificed after day 27
		Mw		0.213	0.28375	0.4045	0.39525	0.465875	0.48475	0.588875	0.610875	0.944	0.903167	1.17367	1.45617
		StDev		0.0671991	0.108416	0.170033	0.169562	0.258558	0.220299	0.325683	0.27901	0.425461	0.149893	0.269874	0.143233
		SEM		0.0237585	0.0383307	0.0601157	0.0599493	0.091414	0.0778875	0.115146	0.0986448	0.150423	0.0611934	0.110176	0.0584747
		C	C1	0.263	0.336	0.355	0.346	0.392	0.264	0.234	0.166	0.199	0.227	0.247	0.327
		100mg/kg	C2	0.283	0.263	0.368	0.299	0.332	0.178	0.183	0.221	0.3	0.282	0.502	0.584
			C3	0.103	0.191	0.284	0.31	0.641	0.723	0.897	1.277	2.301				*mice had to be sacrificed after day 27
			C4	0.224	0.204	0.211	0.19	0.309	0.429	0.297	0.319	0.477	0.547	0.876	1.188
			C5	0.18	0.266	0.294	0.392	0.214	0.29	0.215	0.323	0.247	0.382	0.507	0.542
			C6	0.201	0.208	0.175	0.189	0.225	0.236	0.261	0.132	0.241	0.243	0.323	0.37
			C7	0.294	0.26	0.219	0.29	0.205	0.185	0.235	0.286	0.31	0.406	0.631	0.83
			C8	0.149	0.351	0.316	0.387	0.457	0.343	0.468	0.672	1.645				*mice had to be sacrificed after day 27
		Mw		0.212125	0.259875	0.27775	0.300375	0.346875	0.331	0.34875	0.4245	0.715	0.347833	0.514333	0.640167
		StDev		0.0670872	0.0594052	0.0700444	0.0781664	0.148789	0.178619	0.238041	0.382178	0.800281	0.121773	0.224809	0.322494
		SEM		0.0237189	0.0210029	0.0247644	0.027636	0.0526048	0.0631512	0.0841603	0.13512	0.282942	0.0497135	0.0917779	0.131658
		A-C	7	11	13	15	18	20	22	25	27	29	32	34
		Mann-Whitney U	32	26	14	20	22	18	15	16	16	0	1	0
		Wilcoxon W	68	62	50	56	58	54	51	52	52	21	22	21
		Z	0	-0.630126	-1.89038	-1.26025	-1.05021	-1.47029	-1.78536	-1.68034	-1.68034	-2.88231	-2.72218	-2.88231
		Asymp. Sig. (2-tailed)	1	0.528612	0.0587074	0.207578	0.293622	0.141482	0.0742034	0.0928919	0.0928919	0.00394775	0.00648531	0.00394775
		Exact Sig. [2*(1-tailed Sig.)]	1	0.573737	0.0649573	0.234499	0.328205	0.160528	0.0829837	0.104895	0.104895	0.0021645	0.004329	0.0021645

## Sheet: 4 b
					Tumour											Liver											Heart
		COX1											COX1											COX1
	Veh	1.01794	0.674939	1.29294	1.20042	0.748146	1.06561					Veh	1.34457	1.05341	1.09596	1.0544	1.24452	0.835354	0.617431	0.754357			Veh	0.977289	0.942852	1.14903	1.0374	1.13545	0.741864	0.619298	1.39682
	IMT	0.584543	0.686224	0.339235	0.755039	0.509703	0.532661	0.24808	0.715439			IMT	0.416242	0.656773	0.465383	0.846531	0.865282	0.972832	0.904568	0.674497			IMT	0.328366	0.993013	1.04452	1.38722	2.58145	0.784987
		CytB											CytB											CytB
	Veh	0.963174	0.617637	1.15552	1.38816	0.732436	1.14308					Veh	1.14607	0.931293	1.0015	1.69241	1.43496	0.553336	0.653408	0.587022			Veh	0.805595	0.818	1.19551	0.834213	1.24107	1.43418	0.474205	1.19722
	IMT	0.458021	0.532726	0.244644	0.656033	0.402681	0.410516	0.207484	0.383907			IMT	0.372288	0.619532	0.416035	0.8319	0.852843	0.933517	0.846416	0.419704			IMT	0.325358	0.968205	1.21566	1.49277	1.55133	0.781321
		ND1											ND1											ND1
	Veh	0.987587	0.683176	1.26165	1.1955	0.799554	1.07253					Veh	1.1092	1.04329	0.971475	1.76379	1.20441	0.723333	0.610648	0.573848			Veh	0.779324	0.843606	1.04676	0.83391	1.05839	1.95872	0.440519	1.03876
	IMT	0.201078	0.228749	0.102261	0.35148	0.219792	0.166827	0.136148	0.167066			IMT	0.336694	0.647491	0.260518	0.598675	0.650103	0.75248	0.645823	0.336107			IMT	0.234494	0.707796	0.811489	1.2029	1.14131	0.620957
	Ordinary Two-Way ANOVA, with Sidak's multiple comparisons test
	ANOVA table	SS (Type III)	DF	MS	F (DFn, DFd)	P value
	Interaction	2.612	8	0.3265	F (8, 114) = 3,083	P=0,0035
	Row Factor	3.366	1	3.366	F (1, 114) = 31,78	P<0,0001
	Column Factor	2.612	8	0.3265	F (8, 114) = 3,083	P=0,0035
	Residual	12.07	114	0.1059
	Number of families	1
	Number of comparisons per family	9
	Alpha	0.05
	Sidak's multiple comparisons test	Predicted (LS) mean diff,	95,00% CI of diff,	Significant?	Summary	Adjusted P Value
	Veh - IMT
Tumor	COX1	0.4536	-0,04179 to 0,9491	No	ns	0.0957
	CytB	0.588	0,09257 to 1,083	Yes	**	0.01
	ND1	0.8033	0,3079 to 1,299	Yes	***	0.0001
Liver	COX1	0.2747	-0,1839 to 0,7334	No	ns	0.5889
	CytB	0.3385	-0,1202 to 0,7971	No	ns	0.3059
	ND1	0.4715	0,01284 to 0,9302	Yes	*	0.0398
heart	COX1	-0.1866	-0,6820 to 0,3088	No	ns	0.9545
	CytB	-0.05577	-0,5512 to 0,4397	No	ns	>0,9999
	ND1	0.2135	-0,2819 to 0,7089	No	ns	0.9014
	Test details	Predicted (LS) mean 1	Predicted (LS) mean 2	Predicted (LS) mean diff,	SE of diff,	N1	N2	t	DF
	Veh - IMT
	COX1	1	0.5464	0.4536	0.1758	6	8	2.581	114
	CytB	1	0.412	0.588	0.1758	6	8	3.346	114
	ND1	1	0.1967	0.8033	0.1758	6	8	4.571	114
	COX1	1	0.7253	0.2747	0.1627	8	8	1.688	114
	CytB	1	0.6615	0.3385	0.1627	8	8	2.08	114
	ytB	1	0.5285	0.4715	0.1627	8	8	2.898	114
	COX1	1	1.187	-0.1866	0.1758	8	6	1.062	114
	!_x0001_ND1_x0004_!_x0001_	1	1.056	-0.05577	0.1758	8	6	0.3173	114
	ND1	1	0.7865	0.2135	0.1758	8	6	1.215	114
