# Supplementary material for: Small-molecule inhibitors of human mitochondrial DNA transcription
Source: Springer Nature journal article supplement (doi:10.1038/s41586-020-03048-z), 2020-12-16
Supplement: MOESM7 [file 41586_2020_3048_MOESM7_ESM.xlsx]

## Sheet: Ext 1 c
[IMT1]	ΔTm (°C)							Thermal melting curves (values given are Mean values)
0	0								0 µM	0.001 µM	0.01 µM	0.1 µM	1 µM	10 µM
0.001	0							Temperature (°C)	Fnorm (A.U.)	Fnorm (A.U.)	Fnorm (A.U.)	Fnorm (A.U.)	Fnorm (A.U.)	Fnorm (A.U.)
0.01	0							4	0.8486	0.9043	0.846	0.9814	0.5602	0.3927
0.1	0							4.5	0.8419	0.899	0.8432	0.9764	0.5566	0.389
1	3							5	0.8351	0.8937	0.8404	0.9714	0.5529	0.3854
10	4.5							5.5	0.8284	0.8884	0.8375	0.9664	0.5493	0.3817
								6	0.8216	0.8832	0.8347	0.9613	0.5456	0.378
								6.5	0.8149	0.8779	0.8318	0.9563	0.5419	0.3743
								7	0.8081	0.8726	0.829	0.9513	0.5383	0.3707
								7.5	0.8003	0.8654	0.824	0.9436	0.5333	0.3664
Values given are Mean values								8	0.7923	0.8573	0.8178	0.9344	0.5275	0.3619
								8.5	0.7845	0.8489	0.8114	0.9247	0.5216	0.3576
								9	0.7768	0.8404	0.8046	0.9148	0.516	0.3534
								9.5	0.7692	0.8319	0.7978	0.9046	0.5104	0.3494
								10	0.7617	0.8232	0.7907	0.8942	0.5048	0.3456
								10.5	0.7542	0.8145	0.7836	0.8835	0.4994	0.3417
								11	0.7465	0.8058	0.7762	0.8724	0.4937	0.3379
								11.5	0.7386	0.7969	0.7686	0.8609	0.4876	0.3344
								12	0.7308	0.788	0.7609	0.8493	0.4816	0.3309
								12.5	0.7231	0.779	0.7529	0.8373	0.4753	0.3275
								13	0.7155	0.7699	0.7448	0.8249	0.4689	0.3242
								13.5	0.7082	0.7606	0.7365	0.8124	0.4625	0.3211
								14	0.7011	0.7513	0.728	0.7997	0.4565	0.3181
								14.5	0.6939	0.7419	0.7193	0.7866	0.4503	0.3152
								15	0.6866	0.7326	0.7104	0.7735	0.444	0.3126
								15.5	0.6792	0.7234	0.7012	0.7602	0.4379	0.3102
								16	0.6718	0.7145	0.6919	0.7468	0.4316	0.3077
								16.5	0.6644	0.7058	0.6826	0.7334	0.4253	0.3052
								17	0.6569	0.6971	0.6733	0.7198	0.4191	0.3028
								17.5	0.6495	0.6885	0.6643	0.7064	0.4132	0.3002
								18	0.642	0.68	0.6556	0.6933	0.4074	0.2976
								18.5	0.6344	0.6714	0.6469	0.6804	0.4019	0.295
								19	0.6267	0.6628	0.6383	0.6679	0.3965	0.2924
								19.5	0.6191	0.6543	0.6297	0.656	0.3912	0.2898
								20	0.6116	0.6458	0.6211	0.6443	0.3859	0.2873
								20.5	0.6044	0.6372	0.6126	0.6328	0.3807	0.2848
								21	0.5972	0.6287	0.6043	0.6215	0.3755	0.2824
								21.5	0.5902	0.6202	0.5963	0.6105	0.3705	0.2801
								22	0.5834	0.6118	0.5885	0.5996	0.3655	0.2777
								22.5	0.5765	0.6036	0.5807	0.589	0.3608	0.2754
								23	0.5696	0.5956	0.5731	0.5786	0.3564	0.2732
								23.5	0.5628	0.5877	0.5655	0.5684	0.352	0.2709
								24	0.5561	0.5802	0.5578	0.5583	0.3475	0.2687
								24.5	0.5497	0.5727	0.5501	0.5484	0.3433	0.2665
								25	0.5434	0.5653	0.5426	0.5384	0.339	0.2643
								25.5	0.5374	0.558	0.5352	0.5289	0.3349	0.2622
								26	0.5316	0.5509	0.5282	0.5198	0.3312	0.2602
								26.5	0.5262	0.5441	0.5216	0.5112	0.3278	0.2583
								27	0.5209	0.5377	0.5154	0.5029	0.3245	0.2565
								27.5	0.5161	0.5318	0.5098	0.4956	0.3216	0.2549
								28	0.5116	0.5263	0.5045	0.4887	0.3189	0.2534
								28.5	0.5077	0.5213	0.4997	0.4823	0.3161	0.2521
								29	0.5043	0.5166	0.4952	0.4765	0.3136	0.2508
								29.5	0.5012	0.5121	0.4911	0.4713	0.3115	0.2497
								30	0.4984	0.5081	0.4876	0.4663	0.3096	0.2487
								30.5	0.4962	0.5045	0.4846	0.462	0.3081	0.2479
								31	0.4942	0.5012	0.482	0.4583	0.3071	0.247
								31.5	0.4928	0.4987	0.4801	0.4551	0.3063	0.2463
								32	0.4924	0.4972	0.479	0.4526	0.3059	0.2457
								32.5	0.4928	0.4965	0.4787	0.4511	0.306	0.2452
								33	0.4943	0.497	0.4795	0.4504	0.3065	0.2451
								33.5	0.4973	0.4989	0.4819	0.4511	0.308	0.2456
								34	0.502	0.5024	0.486	0.4533	0.3105	0.2465
								34.5	0.5085	0.5078	0.4921	0.4574	0.314	0.2483
								35	0.5174	0.5155	0.5005	0.4638	0.319	0.2509
								35.5	0.5289	0.5258	0.5115	0.4727	0.3256	0.2544
								36	0.543	0.5387	0.525	0.4844	0.3336	0.2589
								36.5	0.56	0.5546	0.5415	0.499	0.3433	0.2643
								37	0.5802	0.5737	0.5611	0.517	0.3546	0.2709
								37.5	0.6035	0.5959	0.5841	0.5383	0.3678	0.2786
								38	0.6301	0.6217	0.6106	0.5635	0.3833	0.2879
								38.5	0.6601	0.6512	0.6409	0.5928	0.4012	0.299
								39	0.6937	0.6843	0.6748	0.6263	0.422	0.3124
								39.5	0.7304	0.7207	0.7121	0.6636	0.446	0.3282
								40	0.7695	0.7598	0.7522	0.7041	0.4734	0.3469
								40.5	0.8099	0.8003	0.7939	0.7468	0.5043	0.3688
								41	0.8501	0.8408	0.8357	0.7904	0.539	0.3942
								41.5	0.8883	0.8796	0.8759	0.8331	0.577	0.4236
								42	0.9225	0.9148	0.9124	0.8733	0.6185	0.4573
								42.5	0.9513	0.9449	0.9434	0.9092	0.6628	0.4957
								43	0.9735	0.9688	0.968	0.9396	0.7094	0.5391
								43.5	0.9888	0.9858	0.9853	0.9637	0.7569	0.5874
								44	0.9973	0.996	0.9958	0.9812	0.804	0.6399
								44.5	1	1	1	0.9924	0.8492	0.6957
								45	0.9979	0.999	0.9993	0.9985	0.8905	0.753
								45.5	0.9922	0.994	0.9947	1	0.9265	0.8095
								46	0.984	0.9864	0.9876	0.9979	0.9558	0.8625
								46.5	0.9742	0.9768	0.9788	0.9933	0.9776	0.9091
								47	0.9632	0.9661	0.9688	0.9867	0.9919	0.9469
								47.5	0.9515	0.9543	0.9581	0.9784	0.9991	0.9748
								48	0.9391	0.9419	0.9467	0.9688	1	0.9923
								48.5	0.9264	0.9288	0.9349	0.9583	0.9961	1
								49	0.9133	0.9154	0.9227	0.9471	0.9884	1
								49.5	0.8998	0.9014	0.9102	0.9351	0.9781	0.9942
								50	0.886	0.8874	0.8975	0.9229	0.966	0.9842
								50.5	0.872	0.8731	0.8848	0.9102	0.9529	0.9719
								51	0.858	0.8589	0.8718	0.8974	0.939	0.9582
								51.5	0.8439	0.8444	0.8586	0.8847	0.9247	0.9438
								52	0.8298	0.8299	0.8452	0.8722	0.9101	0.9289
								52.5	0.8159	0.8152	0.8316	0.8597	0.8952	0.9137
								53	0.8019	0.8003	0.8177	0.8473	0.88	0.8984
								53.5	0.7877	0.7851	0.8035	0.8347	0.8644	0.8831
								54	0.7733	0.7699	0.7889	0.8216	0.8484	0.8678
								54.5	0.7587	0.7547	0.7738	0.8078	0.8321	0.8525
								55	0.7441	0.7393	0.7582	0.7935	0.8157	0.8373
								55.5	0.7293	0.7242	0.7424	0.7787	0.7991	0.822
								56	0.7146	0.7092	0.7265	0.7634	0.7827	0.8064
								56.5	0.6991	0.6935	0.7103	0.7474	0.766	0.7901
								57	0.6826	0.6771	0.694	0.7305	0.7486	0.7726
								57.5	0.6653	0.6602	0.6774	0.7128	0.7305	0.7543
								58	0.6471	0.6424	0.6604	0.6945	0.7117	0.7352
								58.5	0.6284	0.624	0.6427	0.6754	0.6921	0.7152
								59	0.6106	0.6064	0.6257	0.6571	0.6728	0.6954
								59.5	0.5942	0.5898	0.6093	0.6398	0.6543	0.6767
								60	0.5791	0.574	0.5935	0.6234	0.6368	0.6588
								60.5	0.5653	0.5593	0.5785	0.6079	0.6203	0.6418
								61	0.5524	0.5454	0.5641	0.5932	0.6046	0.6259
								61.5	0.5396	0.5316	0.5495	0.5786	0.5892	0.6107
								62	0.5265	0.5179	0.5348	0.5638	0.574	0.5957
								62.5	0.5133	0.5044	0.5199	0.549	0.5589	0.581
								63	0.4999	0.491	0.505	0.5342	0.544	0.5666
								63.5	0.4866	0.4779	0.4905	0.5197	0.5296	0.5524
								64	0.4736	0.4652	0.4764	0.5058	0.5155	0.5383
								64.5	0.4606	0.4529	0.463	0.4924	0.5018	0.5243
								65	0.4479	0.4409	0.4503	0.4796	0.4887	0.5104
								65.5	0.4354	0.429	0.4382	0.4676	0.4758	0.4965
								66	0.4234	0.4175	0.4265	0.4558	0.463	0.4829
								66.5	0.4116	0.4061	0.4149	0.4444	0.4502	0.4696
								67	0.4004	0.3947	0.4034	0.4331	0.4374	0.4567
								67.5	0.3897	0.3835	0.392	0.4221	0.4245	0.4441
								68	0.3791	0.3725	0.3806	0.4112	0.4116	0.4319
								68.5	0.3687	0.3616	0.3692	0.4004	0.3991	0.4201
								69	0.3582	0.351	0.3582	0.39	0.387	0.4085
								69.5	0.3478	0.3407	0.3473	0.3797	0.3754	0.3971
								70	0.3373	0.3305	0.3367	0.3695	0.3642	0.386
								70.5	0.3269	0.3206	0.3264	0.3594	0.3535	0.375
								71	0.3168	0.3109	0.3163	0.3494	0.3431	0.3641
								71.5	0.3069	0.3014	0.3065	0.3392	0.3329	0.3533
								72	0.2972	0.292	0.2969	0.329	0.3228	0.3427
								72.5	0.2878	0.2829	0.2875	0.3187	0.3128	0.3322
								73	0.2787	0.2738	0.2782	0.3087	0.3028	0.3221
								73.5	0.2697	0.2649	0.2692	0.2988	0.2928	0.3123
								74	0.2607	0.2562	0.2603	0.2893	0.283	0.3027
								74.5	0.2519	0.2476	0.2515	0.2798	0.2736	0.2933
								75	0.2433	0.2393	0.2429	0.2707	0.2644	0.284
								75.5	0.2349	0.2311	0.2345	0.2615	0.2557	0.2744
								76	0.2266	0.223	0.226	0.2523	0.2471	0.2649
								76.5	0.2185	0.2149	0.2177	0.2433	0.2386	0.2557
								77	0.2106	0.207	0.2096	0.2346	0.2299	0.2466
								77.5	0.2027	0.199	0.2016	0.2262	0.2213	0.2376
								78	0.1948	0.1912	0.1937	0.218	0.2125	0.229
								78.5	0.1871	0.1837	0.186	0.2101	0.2037	0.2207
								79	0.1795	0.1762	0.1786	0.2021	0.1951	0.2123
								79.5	0.172	0.169	0.1713	0.1943	0.1866	0.204
								80	0.1646	0.162	0.1641	0.1865	0.1782	0.196
								80.5	0.1575	0.1551	0.157	0.1789	0.1702	0.188
								81	0.1503	0.1483	0.1501	0.1715	0.1625	0.1801
								81.5	0.1432	0.1418	0.1433	0.1643	0.155	0.1723
								82	0.1363	0.1352	0.1365	0.1572	0.1478	0.1645
								82.5	0.1296	0.1288	0.13	0.1502	0.1407	0.1568
								83	0.1228	0.1225	0.1236	0.1434	0.1337	0.1492
								83.5	0.1163	0.1163	0.1173	0.1364	0.1267	0.1416
								84	0.1101	0.1101	0.1112	0.1295	0.12	0.1341
								84.5	0.104	0.1039	0.1053	0.1227	0.1133	0.1269
								85	0.0979	0.0979	0.0995	0.1159	0.1068	0.1198
								85.5	0.092	0.0918	0.0937	0.1092	0.1006	0.113
								86	0.0862	0.0859	0.0881	0.1026	0.0946	0.1062
								86.5	0.0804	0.0802	0.0824	0.096	0.0885	0.0998
								87	0.0748	0.0748	0.0768	0.0896	0.0826	0.0934
								87.5	0.0696	0.0697	0.0714	0.0836	0.0767	0.0873
								88	0.0646	0.065	0.0662	0.0778	0.071	0.0814
								88.5	0.0599	0.0606	0.0614	0.0721	0.0656	0.0758
								89	0.0555	0.0564	0.0568	0.0668	0.0605	0.0702
								89.5	0.0513	0.0521	0.0524	0.0614	0.0556	0.0648
								90	0.0468	0.0476	0.0478	0.0558	0.0509	0.0595
								90.5	0.0424	0.043	0.0432	0.0502	0.0461	0.054
								91	0.0377	0.0383	0.0384	0.0445	0.0412	0.0482
								91.5	0.0329	0.0335	0.0335	0.0385	0.0361	0.0424
								92	0.028	0.0287	0.0285	0.0325	0.031	0.0364
								92.5	0.0233	0.024	0.0235	0.0266	0.0257	0.0303
								93	0.0185	0.0193	0.0186	0.0208	0.0205	0.0242
								93.5	0.0137	0.0145	0.0138	0.0151	0.0154	0.0183
								94	0.0090138	0.0096925	0.0090489	0.009787	0.0102	0.0122
								94.5	0.0043134	0.0048475	0.0043727	0.0044894	0.0051585	0.0062471
								95	0	0	0	0	0	0

## Sheet: Ext 1 g
0 µM IMT1			0.001 µM IMT1			0.01 µM IMT1			0.1 µM IMT1			1 µM IMT1			10 µM IMT1				Michaelis-Menten fit to 0 µM IMT1			Michaelis-Menten fit to 0.001 µM IMT1			Michaelis-Menten fit to 0.01 µM IMT1			Michaelis-Menten fit to 0.1 µM IMT1			Michaelis-Menten fit to 1 µM IMT1			Michaelis-Menten fit to 10 µM IMT1
[NTP] (µM)	V0 (pM.sec-1)		[NTP] (µM)	V0 (pM.sec-1)		[NTP] (µM)	V0 (pM.sec-1)		[NTP] (µM)	V0 (pM.sec-1)		[NTP] (µM)	V0 (pM.sec-1)		[NTP] (µM)	V0 (pM.sec-1)			[NTP] (µM)	V0 (pM.sec-1)		[NTP] (µM)	V0 (pM.sec-1)		[NTP] (µM)	V0 (pM.sec-1)		[NTP] (µM)	V0 (pM.sec-1)		[NTP] (µM)	V0 (pM.sec-1)		[NTP] (µM)	V0 (pM.sec-1)
0.0019531	0		0.0019531	0		0.0019531	0		0.0019531	0		0.0019531	0		0.0019531	0			0.0019531	0		0.0019531	1.0006		0.0019531	1.1623		0.0019531	0.3043		0.0019531	0.3495		0.0019531	0.2312
0.0039063	3.3521		0.0039063	2.8439		0.0039063	1.9722		0.0039063	0.7148		0.0039063	1.026		0.0039063	0.5385			0.0058517	4.0402		0.0058517	2.5098		0.0058517	2.7193		0.0058517	0.8246		0.0058517	0.8583		0.0058517	0.3074
0.0078125	4.956		0.0078125	2.586		0.0078125	4.2077		0.0078125	0.9346		0.0078125	1.2748		0.0156	0.4606			0.0097504	5.3778		0.0097504	3.5964		0.0097504	3.7165		0.0097504	1.2544		0.0097504	1.2117		0.0097504	0.3292
0.0156	7.1427		0.0156	4.7377		0.0313	5.8217		0.0156	1.408		0.0156	0.6844		0.0313	0.3093			0.0136	6.2675		0.0136	4.416		0.0136	4.4098		0.0136	1.6153		0.0136	1.4714		0.0136	0.3395
0.0313	8.608		0.0313	7.1375		0.125	7.1664		0.0313	2.2559		0.0313	2.2518		0.0625	0.5919			0.0175	6.9019		0.0175	5.0564		0.0175	4.9198		0.0175	1.9227		0.0175	1.6704		0.0175	0.3455
0.0625	8.8202		0.0625	7.2845		0.25	7.6659		0.0625	4.6573		0.0625	3.2778		0.125	0.3605			0.0214	7.3772		0.0214	5.5705		0.0214	5.3107		0.0214	2.1876		0.0214	1.8277		0.0214	0.3494
0.125	9.8753		0.125	9.4296		0.5	7.6085		0.125	4.4778		0.125	3.0805		0.25	0.2515			0.0253	7.7465		0.0253	5.9923		0.0253	5.6198		0.0253	2.4184		0.0253	1.9551		0.0253	0.3522
0.25	10.6646		0.25	9.164		1	9.1209		0.25	5.2695		0.25	2.4258		0.5	0.2437			0.0292	8.0418		0.0292	6.3446		0.0292	5.8704		0.0292	2.6211		0.0292	2.0605		0.0292	0.3543
0.5	10.2855		0.5	9.6268					0.5	4.9265		0.5	3.0122		1	0.2676			0.0331	8.2832		0.0331	6.6433		0.0331	6.0777		0.0331	2.8007		0.0331	2.1491		0.0331	0.3559
1	10.35		1	10.5626					1	5.5547		1	3.1141						0.037	8.4843		0.037	6.8998		0.037	6.2519		0.037	2.9608		0.037	2.2246		0.037	0.3572
																			0.0409	8.6544		0.0409	7.1223		0.0409	6.4005		0.0409	3.1045		0.0409	2.2897		0.0409	0.3582
																			0.0448	8.8002		0.0448	7.3174		0.0448	6.5287		0.0448	3.2341		0.0448	2.3465		0.0448	0.359
Values given are Mean values																			0.0487	8.9264		0.0487	7.4896		0.0487	6.6404		0.0487	3.3517		0.0487	2.3964		0.0487	0.3598
																			0.0526	9.0369		0.0526	7.6429		0.0526	6.7386		0.0526	3.4589		0.0526	2.4406		0.0526	0.3604
																			0.0565	9.1343		0.0565	7.7801		0.0565	6.8256		0.0565	3.5569		0.0565	2.48		0.0565	0.3609
Michaelis-Menten Curve-fitting parameters																			0.0604	9.2209		0.0604	7.9038		0.0604	6.9032		0.0604	3.6469		0.0604	2.5154		0.0604	0.3614
Equation: Ligand Binding, one site saturation																			0.0643	9.2984		0.0643	8.0157		0.0643	6.9729		0.0643	3.7298		0.0643	2.5474		0.0643	0.3618
f = Bmax*abs(x)/(Kd + abs(x))																			0.0682	9.3681		0.0682	8.1175		0.0682	7.0359		0.0682	3.8065		0.0682	2.5764		0.0682	0.3622
0 µM IMT1																			0.0721	9.4312		0.0721	8.2105		0.0721	7.093		0.0721	3.8776		0.0721	2.6028		0.0721	0.3625
R	Rsqr	Adj Rsqr	Standard Error of Estimate																0.076	9.4885		0.076	8.2958		0.076	7.145		0.076	3.9437		0.076	2.627		0.076	0.3628
																			0.0799	9.5408		0.0799	8.3744		0.0799	7.1926		0.0799	4.0053		0.0799	2.6492		0.0799	0.3631
0.9812	0.9629	0.9582		0.7291															0.0838	9.5888		0.0838	8.4469		0.0838	7.2363		0.0838	4.0629		0.0838	2.6696		0.0838	0.3633
																			0.0877	9.6329		0.0877	8.5141		0.0877	7.2767		0.0877	4.1168		0.0877	2.6886		0.0877	0.3635
	Coefficient	Std. Error	t	P															0.0916	9.6737		0.0916	8.5765		0.0916	7.3139		0.0916	4.1674		0.0916	2.7061		0.0916	0.3637
																			0.0955	9.7114		0.0955	8.6346		0.0955	7.3485		0.0955	4.215		0.0955	2.7224		0.0955	0.3639
Bmax	10.6907	0.3826	27.9393	<0.0001															0.0994	9.7464		0.0994	8.6889		0.0994	7.3807		0.0994	4.2598		0.0994	2.7377		0.0994	0.3641
Kd	0.0096	0.0017	5.5882	0.0005															0.1033	9.779		0.1033	8.7396		0.1033	7.4107		0.1033	4.3021		0.1033	2.7519		0.1033	0.3642
																			0.1072	9.8094		0.1072	8.7873		0.1072	7.4387		0.1072	4.3421		0.1072	2.7652		0.1072	0.3644
Analysis of Variance:																			0.1111	9.8379		0.1111	8.832		0.1111	7.4649		0.1111	4.3799		0.1111	2.7777		0.1111	0.3645
																			0.115	9.8645		0.115	8.8741		0.115	7.4895		0.115	4.4158		0.115	2.7894		0.115	0.3646
Analysis of Variance:																			0.1189	9.8896		0.1189	8.9139		0.1189	7.5127		0.1189	4.4498		0.1189	2.8005		0.1189	0.3648
	DF	SS	MS																0.1228	9.9132		0.1228	8.9514		0.1228	7.5345		0.1228	4.4822		0.1228	2.811		0.1228	0.3649
Regression	2	658.627	329.314																0.1267	9.9354		0.1267	8.9869		0.1267	7.5551		0.1267	4.513		0.1267	2.8209		0.1267	0.365
Residual	8	4.2526	0.5316																0.1306	9.9564		0.1306	9.0205		0.1306	7.5746		0.1306	4.5424		0.1306	2.8302		0.1306	0.3651
Total	10	662.88	66.288																0.1345	9.9763		0.1345	9.0525		0.1345	7.593		0.1345	4.5704		0.1345	2.8391		0.1345	0.3652
																			0.1384	9.9951		0.1384	9.0828		0.1384	7.6105		0.1384	4.5972		0.1384	2.8475		0.1384	0.3653
Corrected for the mean of the observations:																			0.1423	10.0129		0.1423	9.1117		0.1423	7.6271		0.1423	4.6227		0.1423	2.8555		0.1423	0.3653
	DF	SS	MS	F	P														0.1462	10.0299		0.1462	9.1391		0.1462	7.6429		0.1462	4.6472		0.1462	2.8631		0.1462	0.3654
Regression	1	110.221	110.221	207.35	<0.0001														0.1501	10.046		0.1501	9.1654		0.1501	7.6579		0.1501	4.6707		0.1501	2.8704		0.1501	0.3655
Residual	8	4.2526	0.5316																0.154	10.0614		0.154	9.1904		0.154	7.6722		0.154	4.6931		0.154	2.8773		0.154	0.3656
Total	9	114.474	12.7193																0.1579	10.076		0.1579	9.2143		0.1579	7.6859		0.1579	4.7147		0.1579	2.8839		0.1579	0.3656
																			0.1618	10.09		0.1618	9.2372		0.1618	7.6989		0.1618	4.7354		0.1618	2.8902		0.1618	0.3657
Statistical Tests:																			0.1657	10.1034		0.1657	9.2591		0.1657	7.7114		0.1657	4.7553		0.1657	2.8963		0.1657	0.3658
																			0.1696	10.1161		0.1696	9.2801		0.1696	7.7233		0.1696	4.7745		0.1696	2.9021		0.1696	0.3658
Normality Test (Shapiro-Wilk)			Failed	(P = 0.0144)															0.1735	10.1284		0.1735	9.3003		0.1735	7.7347		0.1735	4.7929		0.1735	2.9077		0.1735	0.3659
																			0.1774	10.1401		0.1774	9.3196		0.1774	7.7457		0.1774	4.8107		0.1774	2.913		0.1774	0.3659
W Statistic= 0.7998	Significance Level = 0.0500																		0.1813	10.1513		0.1813	9.3382		0.1813	7.7562		0.1813	4.8278		0.1813	2.9181		0.1813	0.366
																			0.1852	10.1621		0.1852	9.3561		0.1852	7.7663		0.1852	4.8443		0.1852	2.923		0.1852	0.366
Constant Variance Test		Passed	(P = 0.1988)																0.1891	10.1725		0.1891	9.3733		0.1891	7.776		0.1891	4.8603		0.1891	2.9278		0.1891	0.3661
																			0.193	10.1825		0.193	9.3898		0.193	7.7854		0.193	4.8757		0.193	2.9323		0.193	0.3661
0.001 µM IMT1																			0.1969	10.1921		0.1969	9.4058		0.1969	7.7943		0.1969	4.8905		0.1969	2.9367		0.1969	0.3662
R	Rsqr	Adj Rsqr	Standard Error of Estimate																0.2008	10.2013		0.2008	9.4212		0.2008	7.803		0.2008	4.9049		0.2008	2.941		0.2008	0.3662
																			0.2047	10.2102		0.2047	9.4361		0.2047	7.8114		0.2047	4.9188		0.2047	2.9451		0.2047	0.3662
0.9834	0.967	0.9629		0.6941															0.2086	10.2188		0.2086	9.4504		0.2086	7.8194		0.2086	4.9323		0.2086	2.949		0.2086	0.3663
																			0.2125	10.2271		0.2125	9.4643		0.2125	7.8272		0.2125	4.9454		0.2125	2.9528		0.2125	0.3663
	Coefficient	Std. Error	t	P															0.2164	10.2351		0.2164	9.4777		0.2164	7.8347		0.2164	4.958		0.2164	2.9565		0.2164	0.3664
																			0.2203	10.2428		0.2203	9.4906		0.2203	7.842		0.2203	4.9703		0.2203	2.9601		0.2203	0.3664
Bmax	10.2702	0.4141	24.8027	<0.0001															0.2242	10.2503		0.2242	9.5032		0.2242	7.849		0.2242	4.9821		0.2242	2.9635		0.2242	0.3664
Kd	0.0181	0.0033	5.4682	0.0006															0.2281	10.2575		0.2281	9.5153		0.2281	7.8558		0.2281	4.9937		0.2281	2.9668		0.2281	0.3665
																			0.232	10.2645		0.232	9.5271		0.232	7.8623		0.232	5.0049		0.232	2.9701		0.232	0.3665
Analysis of Variance:																			0.2359	10.2712		0.2359	9.5385		0.2359	7.8687		0.2359	5.0158		0.2359	2.9732		0.2359	0.3665
																			0.2398	10.2778		0.2398	9.5496		0.2398	7.8749		0.2398	5.0263		0.2398	2.9762		0.2398	0.3666
Analysis of Variance:																			0.2437	10.2842		0.2437	9.5603		0.2437	7.8808		0.2437	5.0366		0.2437	2.9792		0.2437	0.3666
	DF	SS	MS																0.2476	10.2903		0.2476	9.5707		0.2476	7.8866		0.2476	5.0466		0.2476	2.982		0.2476	0.3666
Regression	2	514.514	257.257																0.2515	10.2963		0.2515	9.5808		0.2515	7.8923		0.2515	5.0563		0.2515	2.9848		0.2515	0.3666
Residual	8	3.8547	0.4818																0.2554	10.3021		0.2554	9.5907		0.2554	7.8977		0.2554	5.0658		0.2554	2.9875		0.2554	0.3667
Total	10	518.369	51.8369																0.2593	10.3077		0.2593	9.6002		0.2593	7.9031		0.2593	5.075		0.2593	2.9901		0.2593	0.3667
																			0.2632	10.3132		0.2632	9.6095		0.2632	7.9082		0.2632	5.0839		0.2632	2.9926		0.2632	0.3667
Corrected for the mean of the observations:																			0.2671	10.3185		0.2671	9.6185		0.2671	7.9132		0.2671	5.0927		0.2671	2.9951		0.2671	0.3667
	DF	SS	MS	F	P														0.271	10.3237		0.271	9.6273		0.271	7.9181		0.271	5.1012		0.271	2.9975		0.271	0.3668
Regression	1	112.906	112.906	234.323	<0.0001														0.2749	10.3287		0.2749	9.6359		0.2749	7.9228		0.2749	5.1095		0.2749	2.9999		0.2749	0.3668
Residual	8	3.8547	0.4818																0.2788	10.3336		0.2788	9.6442		0.2788	7.9275		0.2788	5.1176		0.2788	3.0021		0.2788	0.3668
Total	9	116.761	12.9734																0.2827	10.3384		0.2827	9.6523		0.2827	7.9319		0.2827	5.1254		0.2827	3.0044		0.2827	0.3668
																			0.2866	10.343		0.2866	9.6602		0.2866	7.9363		0.2866	5.1331		0.2866	3.0065		0.2866	0.3668
Statistical Tests:																			0.2905	10.3475		0.2905	9.6679		0.2905	7.9406		0.2905	5.1407		0.2905	3.0086		0.2905	0.3669
																			0.2943	10.3519		0.2943	9.6755		0.2943	7.9447		0.2943	5.148		0.2943	3.0107		0.2943	0.3669
Normality Test (Shapiro-Wilk)			Passed	(P = 0.7785)															0.2982	10.3562		0.2982	9.6828		0.2982	7.9488		0.2982	5.1552		0.2982	3.0127		0.2982	0.3669
																			0.3021	10.3604		0.3021	9.6899		0.3021	7.9527		0.3021	5.1622		0.3021	3.0146		0.3021	0.3669
W Statistic= 0.9594	Significance Level = 0.0500																		0.306	10.3645		0.306	9.6969		0.306	7.9566		0.306	5.169		0.306	3.0166		0.306	0.3669
																			0.3099	10.3685		0.3099	9.7037		0.3099	7.9604		0.3099	5.1757		0.3099	3.0184		0.3099	0.367
Constant Variance Test		Passed	(P = 0.0665)																0.3138	10.3724		0.3138	9.7104		0.3138	7.964		0.3138	5.1822		0.3138	3.0202		0.3138	0.367
																			0.3177	10.3761		0.3177	9.7169		0.3177	7.9676		0.3177	5.1886		0.3177	3.022		0.3177	0.367
0.01 µM IMT1																			0.3216	10.3798		0.3216	9.7232		0.3216	7.9711		0.3216	5.1949		0.3216	3.0237		0.3216	0.367
R	Rsqr	Adj Rsqr	Standard Error of Estimate																0.3255	10.3835		0.3255	9.7294		0.3255	7.9745		0.3255	5.201		0.3255	3.0254		0.3255	0.367
																			0.3294	10.387		0.3294	9.7355		0.3294	7.9779		0.3294	5.207		0.3294	3.0271		0.3294	0.367
0.9739	0.9485	0.9399		0.7721															0.3333	10.3904		0.3333	9.7414		0.3333	7.9811		0.3333	5.2128		0.3333	3.0287		0.3333	0.367
																			0.3372	10.3938		0.3372	9.7472		0.3372	7.9843		0.3372	5.2186		0.3372	3.0303		0.3372	0.3671
	Coefficient	Std. Error	t	P															0.3411	10.3971		0.3411	9.7529		0.3411	7.9874		0.3411	5.2242		0.3411	3.0318		0.3411	0.3671
																			0.345	10.4003		0.345	9.7585		0.345	7.9905		0.345	5.2297		0.345	3.0334		0.345	0.3671
Bmax	8.267	0.4364	18.9421	<0.0001															0.3489	10.4035		0.3489	9.7639		0.3489	7.9935		0.3489	5.2351		0.3489	3.0348		0.3489	0.3671
Kd	0.0119	0.0034	3.5429	0.0122															0.3528	10.4066		0.3528	9.7692		0.3528	7.9964		0.3528	5.2404		0.3528	3.0363		0.3528	0.3671
																			0.3567	10.4096		0.3567	9.7744		0.3567	7.9993		0.3567	5.2455		0.3567	3.0377		0.3567	0.3671
Analysis of Variance:																			0.3606	10.4126		0.3606	9.7795		0.3606	8.0021		0.3606	5.2506		0.3606	3.0391		0.3606	0.3671
																			0.3645	10.4155		0.3645	9.7845		0.3645	8.0048		0.3645	5.2556		0.3645	3.0405		0.3645	0.3672
Analysis of Variance:																			0.3684	10.4183		0.3684	9.7894		0.3684	8.0075		0.3684	5.2605		0.3684	3.0418		0.3684	0.3672
	DF	SS	MS																0.3723	10.4211		0.3723	9.7942		0.3723	8.0101		0.3723	5.2653		0.3723	3.0431		0.3723	0.3672
Regression	2	303.112	151.556																0.3762	10.4238		0.3762	9.7989		0.3762	8.0127		0.3762	5.27		0.3762	3.0444		0.3762	0.3672
Residual	6	3.5771	0.5962																0.3801	10.4265		0.3801	9.8036		0.3801	8.0152		0.3801	5.2746		0.3801	3.0456		0.3801	0.3672
Total	8	306.689	38.3361																0.384	10.4291		0.384	9.8081		0.384	8.0177		0.384	5.2791		0.384	3.0469		0.384	0.3672
																			0.3879	10.4317		0.3879	9.8125		0.3879	8.0201		0.3879	5.2835		0.3879	3.0481		0.3879	0.3672
Corrected for the mean of the observations:																			0.3918	10.4342		0.3918	9.8169		0.3918	8.0225		0.3918	5.2879		0.3918	3.0493		0.3918	0.3672
	DF	SS	MS	F	P														0.3957	10.4367		0.3957	9.8211		0.3957	8.0249		0.3957	5.2922		0.3957	3.0504		0.3957	0.3672
Regression	1	65.8925	65.8925	110.525	<0.0001														0.3996	10.4391		0.3996	9.8253		0.3996	8.0272		0.3996	5.2964		0.3996	3.0516		0.3996	0.3673
Residual	6	3.5771	0.5962																0.4035	10.4414		0.4035	9.8294		0.4035	8.0294		0.4035	5.3005		0.4035	3.0527		0.4035	0.3673
Total	7	69.4696	9.9242																0.4074	10.4438		0.4074	9.8335		0.4074	8.0316		0.4074	5.3045		0.4074	3.0538		0.4074	0.3673
																			0.4113	10.4461		0.4113	9.8375		0.4113	8.0338		0.4113	5.3085		0.4113	3.0549		0.4113	0.3673
Statistical Tests:																			0.4152	10.4483		0.4152	9.8413		0.4152	8.0359		0.4152	5.3124		0.4152	3.0559		0.4152	0.3673
																			0.4191	10.4505		0.4191	9.8452		0.4191	8.038		0.4191	5.3163		0.4191	3.057		0.4191	0.3673
Normality Test (Shapiro-Wilk)			Passed	(P = 0.2736)															0.423	10.4527		0.423	9.8489		0.423	8.0401		0.423	5.3201		0.423	3.058		0.423	0.3673
																			0.4269	10.4548		0.4269	9.8526		0.4269	8.0421		0.4269	5.3238		0.4269	3.059		0.4269	0.3673
W Statistic= 0.8974	Significance Level = 0.0500																		0.4308	10.4569		0.4308	9.8562		0.4308	8.0441		0.4308	5.3274		0.4308	3.06		0.4308	0.3673
																			0.4347	10.4589		0.4347	9.8598		0.4347	8.046		0.4347	5.331		0.4347	3.061		0.4347	0.3673
Constant Variance Test		Passed	(P = 0.8393)																0.4386	10.461		0.4386	9.8633		0.4386	8.0479		0.4386	5.3346		0.4386	3.0619		0.4386	0.3674
																			0.4425	10.4629		0.4425	9.8668		0.4425	8.0498		0.4425	5.338		0.4425	3.0628		0.4425	0.3674
0.1 µM IMT1																			0.4464	10.4649		0.4464	9.8701		0.4464	8.0516		0.4464	5.3415		0.4464	3.0638		0.4464	0.3674
R	Rsqr	Adj Rsqr	Standard Error of Estimate																0.4503	10.4668		0.4503	9.8735		0.4503	8.0535		0.4503	5.3448		0.4503	3.0647		0.4503	0.3674
																			0.4542	10.4687		0.4542	9.8767		0.4542	8.0552		0.4542	5.3482		0.4542	3.0656		0.4542	0.3674
0.98	0.9603	0.9554		0.4557															0.4581	10.4705		0.4581	9.88		0.4581	8.057		0.4581	5.3514		0.4581	3.0664		0.4581	0.3674
																			0.462	10.4724		0.462	9.8831		0.462	8.0587		0.462	5.3546		0.462	3.0673		0.462	0.3674
	Coefficient	Std. Error	t	P															0.4659	10.4741		0.4659	9.8863		0.4659	8.0604		0.4659	5.3578		0.4659	3.0682		0.4659	0.3674
																			0.4698	10.4759		0.4698	9.8893		0.4698	8.0621		0.4698	5.3609		0.4698	3.069		0.4698	0.3674
Bmax	5.7606	0.3231	17.8284	<0.0001															0.4737	10.4776		0.4737	9.8923		0.4737	8.0637		0.4737	5.364		0.4737	3.0698		0.4737	0.3674
Kd	0.035	0.008	4.3807	0.0023															0.4776	10.4793		0.4776	9.8953		0.4776	8.0654		0.4776	5.367		0.4776	3.0706		0.4776	0.3674
																			0.4815	10.481		0.4815	9.8982		0.4815	8.0669		0.4815	5.3699		0.4815	3.0714		0.4815	0.3674
Analysis of Variance:																			0.4854	10.4827		0.4854	9.9011		0.4854	8.0685		0.4854	5.3729		0.4854	3.0722		0.4854	0.3674
																			0.4893	10.4843		0.4893	9.904		0.4893	8.0701		0.4893	5.3758		0.4893	3.073		0.4893	0.3675
Analysis of Variance:																			0.4932	10.4859		0.4932	9.9067		0.4932	8.0716		0.4932	5.3786		0.4932	3.0737		0.4932	0.3675
	DF	SS	MS																0.4971	10.4875		0.4971	9.9095		0.4971	8.0731		0.4971	5.3814		0.4971	3.0745		0.4971	0.3675
Regression	2	131.429	65.7146																0.501	10.489		0.501	9.9122		0.501	8.0746		0.501	5.3841		0.501	3.0752		0.501	0.3675
Residual	8	1.6616	0.2077																0.5049	10.4906		0.5049	9.9149		0.5049	8.076		0.5049	5.3869		0.5049	3.0759		0.5049	0.3675
Total	10	133.091	13.3091																0.5088	10.4921		0.5088	9.9175		0.5088	8.0774		0.5088	5.3895		0.5088	3.0766		0.5088	0.3675
																			0.5127	10.4935		0.5127	9.9201		0.5127	8.0788		0.5127	5.3922		0.5127	3.0773		0.5127	0.3675
Corrected for the mean of the observations:																			0.5166	10.495		0.5166	9.9227		0.5166	8.0802		0.5166	5.3948		0.5166	3.078		0.5166	0.3675
	DF	SS	MS	F	P														0.5205	10.4964		0.5205	9.9252		0.5205	8.0816		0.5205	5.3974		0.5205	3.0787		0.5205	0.3675
Regression	1	40.2299	40.2299	193.694	<0.0001														0.5244	10.4979		0.5244	9.9276		0.5244	8.0829		0.5244	5.3999		0.5244	3.0794		0.5244	0.3675
Residual	8	1.6616	0.2077																0.5283	10.4993		0.5283	9.9301		0.5283	8.0843		0.5283	5.4024		0.5283	3.0801		0.5283	0.3675
Total	9	41.8915	4.6546																0.5322	10.5006		0.5322	9.9325		0.5322	8.0856		0.5322	5.4048		0.5322	3.0807		0.5322	0.3675
																			0.5361	10.502		0.5361	9.9349		0.5361	8.0869		0.5361	5.4073		0.5361	3.0814		0.5361	0.3675
Statistical Tests:																			0.54	10.5033		0.54	9.9372		0.54	8.0881		0.54	5.4097		0.54	3.082		0.54	0.3675
																			0.5439	10.5047		0.5439	9.9395		0.5439	8.0894		0.5439	5.412		0.5439	3.0826		0.5439	0.3675
Normality Test (Shapiro-Wilk)			Passed	(P = 0.0730)															0.5478	10.506		0.5478	9.9418		0.5478	8.0906		0.5478	5.4144		0.5478	3.0832		0.5478	0.3675
																			0.5517	10.5072		0.5517	9.9441		0.5517	8.0919		0.5517	5.4167		0.5517	3.0839		0.5517	0.3676
W Statistic= 0.8584	Significance Level = 0.0500																		0.5556	10.5085		0.5556	9.9463		0.5556	8.0931		0.5556	5.4189		0.5556	3.0845		0.5556	0.3676
																			0.5595	10.5097		0.5595	9.9485		0.5595	8.0942		0.5595	5.4212		0.5595	3.085		0.5595	0.3676
Constant Variance Test		Passed	(P = 0.7069)																0.5634	10.511		0.5634	9.9506		0.5634	8.0954		0.5634	5.4234		0.5634	3.0856		0.5634	0.3676
																			0.5673	10.5122		0.5673	9.9527		0.5673	8.0966		0.5673	5.4256		0.5673	3.0862		0.5673	0.3676
1 µM IMT1																			0.5712	10.5134		0.5712	9.9548		0.5712	8.0977		0.5712	5.4277		0.5712	3.0868		0.5712	0.3676
R	Rsqr	Adj Rsqr	Standard Error of Estimate																0.5751	10.5146		0.5751	9.9569		0.5751	8.0988		0.5751	5.4299		0.5751	3.0873		0.5751	0.3676
																			0.5789	10.5157		0.5789	9.959		0.5789	8.0999		0.5789	5.432		0.5789	3.0879		0.5789	0.3676
0.9127	0.833	0.8122		0.5111															0.5828	10.5169		0.5828	9.961		0.5828	8.101		0.5828	5.434		0.5828	3.0884		0.5828	0.3676
																			0.5867	10.518		0.5867	9.963		0.5867	8.1021		0.5867	5.4361		0.5867	3.089		0.5867	0.3676
	Coefficient	Std. Error	t	P															0.5906	10.5192		0.5906	9.9649		0.5906	8.1032		0.5906	5.4381		0.5906	3.0895		0.5906	0.3676
																			0.5945	10.5203		0.5945	9.9669		0.5945	8.1042		0.5945	5.4401		0.5945	3.0901		0.5945	0.3676
Bmax	3.172	0.2957	10.7274	<0.0001															0.5984	10.5214		0.5984	9.9688		0.5984	8.1053		0.5984	5.4421		0.5984	3.0906		0.5984	0.3676
Kd	0.0158	0.0068	2.3154	0.0493															0.6023	10.5224		0.6023	9.9707		0.6023	8.1063		0.6023	5.444		0.6023	3.0911		0.6023	0.3676
																			0.6062	10.5235		0.6062	9.9726		0.6062	8.1073		0.6062	5.4459		0.6062	3.0916		0.6062	0.3676
Analysis of Variance:																			0.6101	10.5245		0.6101	9.9744		0.6101	8.1083		0.6101	5.4478		0.6101	3.0921		0.6101	0.3676
																			0.614	10.5256		0.614	9.9762		0.614	8.1093		0.614	5.4497		0.614	3.0926		0.614	0.3676
Analysis of Variance:																			0.6179	10.5266		0.6179	9.978		0.6179	8.1103		0.6179	5.4516		0.6179	3.0931		0.6179	0.3676
	DF	SS	MS																0.6218	10.5276		0.6218	9.9798		0.6218	8.1112		0.6218	5.4534		0.6218	3.0936		0.6218	0.3676
Regression	2	51.0158	25.5079																0.6257	10.5286		0.6257	9.9816		0.6257	8.1122		0.6257	5.4552		0.6257	3.094		0.6257	0.3676
Residual	8	2.0895	0.2612																0.6296	10.5296		0.6296	9.9833		0.6296	8.1131		0.6296	5.457		0.6296	3.0945		0.6296	0.3676
Total	10	53.1053	5.3105																0.6335	10.5306		0.6335	9.985		0.6335	8.1141		0.6335	5.4588		0.6335	3.095		0.6335	0.3677
																			0.6374	10.5316		0.6374	9.9867		0.6374	8.115		0.6374	5.4605		0.6374	3.0954		0.6374	0.3677
Corrected for the mean of the observations:																			0.6413	10.5325		0.6413	9.9884		0.6413	8.1159		0.6413	5.4623		0.6413	3.0959		0.6413	0.3677
	DF	SS	MS	F	P														0.6452	10.5335		0.6452	9.9901		0.6452	8.1168		0.6452	5.464		0.6452	3.0963		0.6452	0.3677
Regression	1	10.4244	10.4244	39.9111	0.0002														0.6491	10.5344		0.6491	9.9917		0.6491	8.1177		0.6491	5.4657		0.6491	3.0968		0.6491	0.3677
Residual	8	2.0895	0.2612																0.653	10.5353		0.653	9.9933		0.653	8.1185		0.653	5.4673		0.653	3.0972		0.653	0.3677
Total	9	12.5139	1.3904																0.6569	10.5362		0.6569	9.9949		0.6569	8.1194		0.6569	5.469		0.6569	3.0977		0.6569	0.3677
																			0.6608	10.5371		0.6608	9.9965		0.6608	8.1203		0.6608	5.4706		0.6608	3.0981		0.6608	0.3677
Statistical Tests:																			0.6647	10.538		0.6647	9.9981		0.6647	8.1211		0.6647	5.4722		0.6647	3.0985		0.6647	0.3677
																			0.6686	10.5389		0.6686	9.9996		0.6686	8.1219		0.6686	5.4738		0.6686	3.0989		0.6686	0.3677
Normality Test (Shapiro-Wilk)			Passed	(P = 0.9343)															0.6725	10.5397		0.6725	10.0011		0.6725	8.1228		0.6725	5.4754		0.6725	3.0993		0.6725	0.3677
																			0.6764	10.5406		0.6764	10.0026		0.6764	8.1236		0.6764	5.477		0.6764	3.0997		0.6764	0.3677
W Statistic= 0.9752	Significance Level = 0.0500																		0.6803	10.5414		0.6803	10.0041		0.6803	8.1244		0.6803	5.4785		0.6803	3.1002		0.6803	0.3677
																			0.6842	10.5423		0.6842	10.0056		0.6842	8.1252		0.6842	5.4801		0.6842	3.1006		0.6842	0.3677
Constant Variance Test		Passed	(P = 0.2128)																0.6881	10.5431		0.6881	10.0071		0.6881	8.126		0.6881	5.4816		0.6881	3.1009		0.6881	0.3677
																			0.692	10.5439		0.692	10.0085		0.692	8.1268		0.692	5.4831		0.692	3.1013		0.692	0.3677
10 µM IMT1																			0.6959	10.5447		0.6959	10.0099		0.6959	8.1275		0.6959	5.4845		0.6959	3.1017		0.6959	0.3677
R	Rsqr	Adj Rsqr	Standard Error of Estimate																0.6998	10.5455		0.6998	10.0114		0.6998	8.1283		0.6998	5.486		0.6998	3.1021		0.6998	0.3677
																			0.7037	10.5463		0.7037	10.0128		0.7037	8.1291		0.7037	5.4875		0.7037	3.1025		0.7037	0.3677
0.3461	0.1198	0		0.1796															0.7076	10.5471		0.7076	10.0141		0.7076	8.1298		0.7076	5.4889		0.7076	3.1029		0.7076	0.3677
																			0.7115	10.5479		0.7115	10.0155		0.7115	8.1305		0.7115	5.4903		0.7115	3.1032		0.7115	0.3677
	Coefficient	Std. Error	t	P															0.7154	10.5487		0.7154	10.0169		0.7154	8.1313		0.7154	5.4917		0.7154	3.1036		0.7154	0.3677
																			0.7193	10.5494		0.7193	10.0182		0.7193	8.132		0.7193	5.4931		0.7193	3.104		0.7193	0.3677
Bmax	0.3683	0.0741	4.9695	0.0016															0.7232	10.5502		0.7232	10.0195		0.7232	8.1327		0.7232	5.4945		0.7232	3.1043		0.7232	0.3677
Kd	0.0012	0.0021	0.5412	0.6052															0.7271	10.5509		0.7271	10.0208		0.7271	8.1334		0.7271	5.4958		0.7271	3.1047		0.7271	0.3677
																			0.731	10.5517		0.731	10.0221		0.731	8.1341		0.731	5.4972		0.731	3.105		0.731	0.3677
Analysis of Variance:																			0.7349	10.5524		0.7349	10.0234		0.7349	8.1348		0.7349	5.4985		0.7349	3.1054		0.7349	0.3677
																			0.7388	10.5531		0.7388	10.0247		0.7388	8.1355		0.7388	5.4998		0.7388	3.1057		0.7388	0.3677
Analysis of Variance:																			0.7427	10.5538		0.7427	10.026		0.7427	8.1362		0.7427	5.5011		0.7427	3.1061		0.7427	0.3677
	DF	SS	MS																0.7466	10.5545		0.7466	10.0272		0.7466	8.1369		0.7466	5.5024		0.7466	3.1064		0.7466	0.3678
Regression	2	1.0466	0.5233																0.7505	10.5552		0.7505	10.0284		0.7505	8.1375		0.7505	5.5037		0.7505	3.1067		0.7505	0.3678
Residual	7	0.2259	0.0323																0.7544	10.5559		0.7544	10.0297		0.7544	8.1382		0.7544	5.505		0.7544	3.1071		0.7544	0.3678
Total	9	1.2725	0.1414																0.7583	10.5566		0.7583	10.0309		0.7583	8.1388		0.7583	5.5062		0.7583	3.1074		0.7583	0.3678
																			0.7622	10.5573		0.7622	10.0321		0.7622	8.1395		0.7622	5.5075		0.7622	3.1077		0.7622	0.3678
Corrected for the mean of the observations:																			0.7661	10.558		0.7661	10.0332		0.7661	8.1401		0.7661	5.5087		0.7661	3.108		0.7661	0.3678
	DF	SS	MS	F	P														0.77	10.5586		0.77	10.0344		0.77	8.1407		0.77	5.5099		0.77	3.1084		0.77	0.3678
Regression	1	0.0307	0.0307	0.9528	0.3615														0.7739	10.5593		0.7739	10.0356		0.7739	8.1414		0.7739	5.5112		0.7739	3.1087		0.7739	0.3678
Residual	7	0.2259	0.0323																0.7778	10.5599		0.7778	10.0367		0.7778	8.142		0.7778	5.5123		0.7778	3.109		0.7778	0.3678
Total	8	0.2566	0.0321																0.7817	10.5606		0.7817	10.0379		0.7817	8.1426		0.7817	5.5135		0.7817	3.1093		0.7817	0.3678
																			0.7856	10.5612		0.7856	10.039		0.7856	8.1432		0.7856	5.5147		0.7856	3.1096		0.7856	0.3678
Statistical Tests:																			0.7895	10.5618		0.7895	10.0401		0.7895	8.1438		0.7895	5.5159		0.7895	3.1099		0.7895	0.3678
																			0.7934	10.5625		0.7934	10.0412		0.7934	8.1444		0.7934	5.517		0.7934	3.1102		0.7934	0.3678
Normality Test (Shapiro-Wilk)			Passed	(P = 0.3979)															0.7973	10.5631		0.7973	10.0423		0.7973	8.145		0.7973	5.5182		0.7973	3.1105		0.7973	0.3678
																			0.8012	10.5637		0.8012	10.0434		0.8012	8.1456		0.8012	5.5193		0.8012	3.1108		0.8012	0.3678
W Statistic= 0.9207	Significance Level = 0.0500																		0.8051	10.5643		0.8051	10.0445		0.8051	8.1462		0.8051	5.5204		0.8051	3.1111		0.8051	0.3678
																			0.809	10.5649		0.809	10.0455		0.809	8.1467		0.809	5.5215		0.809	3.1114		0.809	0.3678
Constant Variance Test		Passed	(P = 0.1243)																0.8129	10.5655		0.8129	10.0466		0.8129	8.1473		0.8129	5.5226		0.8129	3.1117		0.8129	0.3678
																			0.8168	10.5661		0.8168	10.0476		0.8168	8.1479		0.8168	5.5237		0.8168	3.1119		0.8168	0.3678
																			0.8207	10.5667		0.8207	10.0487		0.8207	8.1484		0.8207	5.5248		0.8207	3.1122		0.8207	0.3678
																			0.8246	10.5673		0.8246	10.0497		0.8246	8.149		0.8246	5.5259		0.8246	3.1125		0.8246	0.3678
																			0.8285	10.5678		0.8285	10.0507		0.8285	8.1495		0.8285	5.5269		0.8285	3.1128		0.8285	0.3678
																			0.8324	10.5684		0.8324	10.0517		0.8324	8.1501		0.8324	5.528		0.8324	3.113		0.8324	0.3678
																			0.8363	10.569		0.8363	10.0527		0.8363	8.1506		0.8363	5.529		0.8363	3.1133		0.8363	0.3678
																			0.8402	10.5695		0.8402	10.0537		0.8402	8.1511		0.8402	5.53		0.8402	3.1136		0.8402	0.3678
																			0.8441	10.5701		0.8441	10.0547		0.8441	8.1517		0.8441	5.5311		0.8441	3.1138		0.8441	0.3678
																			0.848	10.5706		0.848	10.0556		0.848	8.1522		0.848	5.5321		0.848	3.1141		0.848	0.3678
																			0.8519	10.5712		0.8519	10.0566		0.8519	8.1527		0.8519	5.5331		0.8519	3.1144		0.8519	0.3678
																			0.8558	10.5717		0.8558	10.0576		0.8558	8.1532		0.8558	5.5341		0.8558	3.1146		0.8558	0.3678
																			0.8596	10.5722		0.8596	10.0585		0.8596	8.1537		0.8596	5.5351		0.8596	3.1149		0.8596	0.3678
																			0.8635	10.5728		0.8635	10.0594		0.8635	8.1542		0.8635	5.536		0.8635	3.1151		0.8635	0.3678
																			0.8674	10.5733		0.8674	10.0604		0.8674	8.1547		0.8674	5.537		0.8674	3.1154		0.8674	0.3678
																			0.8713	10.5738		0.8713	10.0613		0.8713	8.1552		0.8713	5.538		0.8713	3.1156		0.8713	0.3678
																			0.8752	10.5743		0.8752	10.0622		0.8752	8.1557		0.8752	5.5389		0.8752	3.1159		0.8752	0.3678
																			0.8791	10.5748		0.8791	10.0631		0.8791	8.1562		0.8791	5.5399		0.8791	3.1161		0.8791	0.3678
																			0.883	10.5753		0.883	10.064		0.883	8.1567		0.883	5.5408		0.883	3.1164		0.883	0.3678
																			0.8869	10.5758		0.8869	10.0649		0.8869	8.1572		0.8869	5.5417		0.8869	3.1166		0.8869	0.3678
																			0.8908	10.5763		0.8908	10.0658		0.8908	8.1576		0.8908	5.5427		0.8908	3.1168		0.8908	0.3678
																			0.8947	10.5768		0.8947	10.0666		0.8947	8.1581		0.8947	5.5436		0.8947	3.1171		0.8947	0.3678
																			0.8986	10.5773		0.8986	10.0675		0.8986	8.1586		0.8986	5.5445		0.8986	3.1173		0.8986	0.3678
																			0.9025	10.5778		0.9025	10.0684		0.9025	8.159		0.9025	5.5454		0.9025	3.1175		0.9025	0.3679
																			0.9064	10.5783		0.9064	10.0692		0.9064	8.1595		0.9064	5.5463		0.9064	3.1178		0.9064	0.3679
																			0.9103	10.5788		0.9103	10.0701		0.9103	8.16		0.9103	5.5472		0.9103	3.118		0.9103	0.3679
																			0.9142	10.5792		0.9142	10.0709		0.9142	8.1604		0.9142	5.548		0.9142	3.1182		0.9142	0.3679
																			0.9181	10.5797		0.9181	10.0717		0.9181	8.1609		0.9181	5.5489		0.9181	3.1185		0.9181	0.3679
																			0.922	10.5802		0.922	10.0725		0.922	8.1613		0.922	5.5498		0.922	3.1187		0.922	0.3679
																			0.9259	10.5806		0.9259	10.0734		0.9259	8.1617		0.9259	5.5506		0.9259	3.1189		0.9259	0.3679
																			0.9298	10.5811		0.9298	10.0742		0.9298	8.1622		0.9298	5.5515		0.9298	3.1191		0.9298	0.3679
																			0.9337	10.5815		0.9337	10.075		0.9337	8.1626		0.9337	5.5523		0.9337	3.1193		0.9337	0.3679
																			0.9376	10.582		0.9376	10.0758		0.9376	8.163		0.9376	5.5531		0.9376	3.1196		0.9376	0.3679
																			0.9415	10.5824		0.9415	10.0766		0.9415	8.1635		0.9415	5.554		0.9415	3.1198		0.9415	0.3679
																			0.9454	10.5829		0.9454	10.0773		0.9454	8.1639		0.9454	5.5548		0.9454	3.12		0.9454	0.3679
																			0.9493	10.5833		0.9493	10.0781		0.9493	8.1643		0.9493	5.5556		0.9493	3.1202		0.9493	0.3679
																			0.9532	10.5838		0.9532	10.0789		0.9532	8.1647		0.9532	5.5564		0.9532	3.1204		0.9532	0.3679
																			0.9571	10.5842		0.9571	10.0797		0.9571	8.1651		0.9571	5.5572		0.9571	3.1206		0.9571	0.3679
																			0.961	10.5846		0.961	10.0804		0.961	8.1655		0.961	5.558		0.961	3.1208		0.961	0.3679
																			0.9649	10.585		0.9649	10.0812		0.9649	8.1659		0.9649	5.5588		0.9649	3.121		0.9649	0.3679
																			0.9688	10.5855		0.9688	10.0819		0.9688	8.1663		0.9688	5.5596		0.9688	3.1212		0.9688	0.3679
																			0.9727	10.5859		0.9727	10.0827		0.9727	8.1667		0.9727	5.5604		0.9727	3.1214		0.9727	0.3679
																			0.9766	10.5863		0.9766	10.0834		0.9766	8.1671		0.9766	5.5611		0.9766	3.1216		0.9766	0.3679
																			0.9805	10.5867		0.9805	10.0841		0.9805	8.1675		0.9805	5.5619		0.9805	3.1218		0.9805	0.3679
																			0.9844	10.5871		0.9844	10.0848		0.9844	8.1679		0.9844	5.5627		0.9844	3.122		0.9844	0.3679
																			0.9883	10.5875		0.9883	10.0856		0.9883	8.1683		0.9883	5.5634		0.9883	3.1222		0.9883	0.3679
																			0.9922	10.5879		0.9922	10.0863		0.9922	8.1687		0.9922	5.5642		0.9922	3.1224		0.9922	0.3679
																			0.9961	10.5883		0.9961	10.087		0.9961	8.1691		0.9961	5.5649		0.9961	3.1226		0.9961	0.3679
																			1	10.5887		1	10.0877		1	8.1694		1	5.5656		1	3.1228		1	0.3679

## Sheet: Ext 1 i
								Fit to 1-site saturation curve (0 µM IMT1B)					Fit to 1-site saturation curve (0.001 µM IMT1B)					Fit to 1-site saturation curve (0.01 µM IMT1B)					Fit to 1-site saturation curve (0.1 µM IMT1B)					Fit to 1-site saturation curve (1 µM IMT1B)					Fit to 1-site saturation curve (10 µM IMT1B)
[IMT1B]	Kd (nM)	SD				[POLRMT] (nM)	Fnorm	[POLRMT] (nM)	Fnorm		[POLRMT] (nM)	Fnorm	[POLRMT] (nM)	Fnorm		[POLRMT] (nM)	Fnorm	[POLRMT] (nM)	Fnorm		[POLRMT] (nM)	Fnorm	[POLRMT] (nM)	Fnorm		[POLRMT] (nM)	Fnorm	[POLRMT] (nM)	Fnorm		[POLRMT] (nM)	Fnorm	[POLRMT] (nM)	Fnorm
0.0001	97.6	15.6				0.452	942.917	0.1	942.655		0.452	941.289	0.1	941.313		0.452	943.856	0.1	943.907		0.452	944.818	0.1	944.208		0.452	944.755	0.1	944.606		0.452	944.457	0.1	943.673
0.001	179	7.4				0.904	942.316	0.113	942.657		0.904	941.593	0.113	941.315		0.904	943	0.113	943.908		0.904	944.256	0.113	944.208		0.904	944.998	0.115	944.606		0.904	943.431	0.115	943.674
0.01	234	25.6				1.809	942.928	0.127	942.659		1.809	941.466	0.127	941.316		1.809	943.1	0.127	943.909		1.809	944.31	0.127	944.209		1.809	944.37	0.133	944.606		1.809	943.696	0.133	943.675
0.1	488	51.7				3.617	942.805	0.143	942.661		3.617	942.007	0.143	941.318		3.617	944.361	0.143	943.911		3.617	944.157	0.143	944.209		3.617	945.255	0.153	944.606		3.617	944.174	0.153	943.676
1	730	17.8				7.234	943.957	0.161	942.664		7.234	943.241	0.161	941.32		7.234	944.931	0.161	943.912		7.234	943.938	0.161	944.21		7.234	944.542	0.177	944.607		7.234	941.93	0.177	943.677
10	743	19.4				14.469	945.417	0.182	942.667		14.469	944.03	0.182	941.323		14.469	945.646	0.182	943.914		14.469	944.199	0.182	944.21		14.469	944.995	0.204	944.607		14.469	944.172	0.204	943.678
						28.938	945.167	0.205	942.67		28.938	943.098	0.205	941.325		28.938	947.473	0.205	943.916		28.938	945.139	0.205	944.211		28.938	943.945	0.236	944.607		28.938	946.298	0.236	943.68
						57.875	948.283	0.231	942.674		57.875	946.482	0.231	941.328		57.875	948.793	0.231	943.919		57.875	945.015	0.231	944.211		57.875	945.507	0.272	944.608		57.875	946.17	0.272	943.682
Values given are Mean values						115.75	951.191	0.261	942.678		115.75	950.362	0.261	941.332		115.75	951.607	0.261	943.921		115.75	947.418	0.261	944.212		115.75	946.678	0.313	944.608		115.75	948.697	0.313	943.684
						231.5	954.069	0.294	942.683		231.5	954.41	0.294	941.336		231.5	954.586	0.294	943.925		231.5	947.583	0.294	944.213		231.5	947.621	0.361	944.609		231.5	950.453	0.361	943.686
						463	955.523	0.331	942.688		463	955.74	0.331	941.34		463	958.194	0.331	943.928		463	950.311	0.331	944.214		463	949.236	0.417	944.61		463	957.172	0.417	943.689
						926	957.327	0.373	942.694		926	961.306	0.373	941.345		926	963.207	0.373	943.932		926	948.625	0.373	944.215		926	950.389	0.481	944.611		926	963.798	0.481	943.692
								0.421	942.701				0.421	941.35				0.421	943.936				0.421	944.216				0.555	944.611				0.555	943.696
								0.474	942.708				0.474	941.356				0.474	943.941				0.474	944.217				0.64	944.613				0.64	943.7
								0.535	942.717				0.535	941.363				0.535	943.947				0.535	944.219				0.738	944.614				0.738	943.705
								0.603	942.726				0.603	941.371				0.603	943.953				0.603	944.221				0.851	944.615				0.851	943.711
								0.679	942.737				0.679	941.38				0.679	943.96				0.679	944.222				0.982	944.617				0.982	943.717
								0.766	942.75				0.766	941.39				0.766	943.968				0.766	944.225				1.132	944.619				1.132	943.725
								0.863	942.763				0.863	941.401				0.863	943.977				0.863	944.227				1.306	944.621				1.306	943.733
								0.973	942.779				0.973	941.414				0.973	943.988				0.973	944.23				1.507	944.623				1.507	943.743
								1.096	942.796				1.096	941.428				1.096	943.999				1.096	944.233				1.738	944.626				1.738	943.755
								1.236	942.816				1.236	941.444				1.236	944.012				1.236	944.236				2.004	944.63				2.004	943.768
								1.393	942.838				1.393	941.462				1.393	944.026				1.393	944.24				2.312	944.633				2.312	943.783
								1.57	942.863				1.57	941.482				1.57	944.043				1.57	944.244				2.667	944.638				2.667	943.801
								1.77	942.89				1.77	941.505				1.77	944.061				1.77	944.249				3.076	944.643				3.076	943.821
								1.995	942.922				1.995	941.531				1.995	944.082				1.995	944.255				3.548	944.649				3.548	943.845
								2.249	942.957				2.249	941.559				2.249	944.105				2.249	944.261				4.093	944.656				4.093	943.872
								2.535	942.996				2.535	941.592				2.535	944.131				2.535	944.268				4.721	944.663				4.721	943.903
								2.858	943.041				2.858	941.628				2.858	944.161				2.858	944.276				5.445	944.672				5.445	943.939
								3.221	943.09				3.221	941.669				3.221	944.194				3.221	944.285				6.281	944.683				6.281	943.98
								3.631	943.146				3.631	941.715				3.631	944.231				3.631	944.294				7.244	944.695				7.244	944.027
								4.093	943.208				4.093	941.767				4.093	944.273				4.093	944.306				8.356	944.708				8.356	944.082
								4.613	943.278				4.613	941.825				4.613	944.32				4.613	944.318				9.638	944.724				9.638	944.144
								5.2	943.356				5.2	941.89				5.2	944.372				5.2	944.332				11.117	944.742				11.117	944.217
								5.861	943.443				5.861	941.962				5.861	944.431				5.861	944.348				12.823	944.763				12.823	944.299
								6.607	943.54				6.607	942.044				6.607	944.498				6.607	944.366				14.791	944.787				14.791	944.394
								7.447	943.648				7.447	942.135				7.447	944.572				7.447	944.386				17.061	944.814				17.061	944.503
								8.395	943.768				8.395	942.237				8.395	944.655				8.395	944.409				19.679	944.845				19.679	944.628
								9.462	943.901				9.462	942.351				9.462	944.748				9.462	944.434				22.699	944.881				22.699	944.772
								10.666	944.049				10.666	942.478				10.666	944.852				10.666	944.463				26.182	944.922				26.182	944.935
								12.023	944.213				12.023	942.619				12.023	944.968				12.023	944.495				30.2	944.969				30.2	945.122
								13.552	944.394				13.552	942.776				13.552	945.098				13.552	944.531				34.834	945.023				34.834	945.336
								15.276	944.592				15.276	942.951				15.276	945.242				15.276	944.571				40.179	945.084				40.179	945.579
								17.219	944.811				17.219	943.145				17.219	945.403				17.219	944.616				46.345	945.153				46.345	945.856
								19.409	945.05				19.409	943.36				19.409	945.581				19.409	944.666				53.456	945.232				53.456	946.17
								21.878	945.31				21.878	943.596				21.878	945.779				21.878	944.722				61.66	945.321				61.66	946.525
								24.66	945.593				24.66	943.857				24.66	945.998				24.66	944.785				71.121	945.421				71.121	946.927
								27.797	945.9				27.797	944.144				27.797	946.239				27.797	944.855				82.035	945.534				82.035	947.379
								31.333	946.23				31.333	944.457				31.333	946.505				31.333	944.933				94.624	945.661				94.624	947.886
								35.318	946.584				35.318	944.8				35.318	946.798				35.318	945.02				109.144	945.803				109.144	948.452
								39.811	946.962				39.811	945.173				39.811	947.118				39.811	945.116				125.893	945.96				125.893	949.083
								44.875	947.362				44.875	945.577				44.875	947.467				44.875	945.222				145.211	946.135				145.211	949.782
								50.582	947.784				50.582	946.012				50.582	947.847				50.582	945.34				167.494	946.327				167.494	950.552
								57.016	948.226				57.016	946.48				57.016	948.259				57.016	945.47				193.197	946.538				193.197	951.396
								64.269	948.685				64.269	946.981				64.269	948.704				64.269	945.613				222.844	946.767				222.844	952.315
								72.444	949.16				72.444	947.512				72.444	949.181				72.444	945.77				257.04	947.014				257.04	953.309
								81.658	949.646				81.658	948.074				81.658	949.691				81.658	945.941				296.483	947.279				296.483	954.375
								92.045	950.14				92.045	948.665				92.045	950.234				92.045	946.129				341.979	947.561				341.979	955.51
								103.753	950.639				103.753	949.281				103.753	950.807				103.753	946.332				394.457	947.858				394.457	956.707
								116.95	951.139				116.95	949.92				116.95	951.41				116.95	946.553				454.988	948.169				454.988	957.96
								131.826	951.635				131.826	950.578				131.826	952.04				131.826	946.79				524.807	948.49				524.807	959.258
								148.594	952.123				148.594	951.25				148.594	952.693				148.594	947.045				605.341	948.82				605.341	960.59
								167.494	952.601				167.494	951.932				167.494	953.366				167.494	947.317				698.232	949.154				698.232	961.942
								188.799	953.064				188.799	952.619				188.799	954.054				188.799	947.606				805.378	949.489				805.378	963.301
								212.814	953.511				212.814	953.305				212.814	954.753				212.814	947.911				928.966	949.822				928.966	964.654
								239.883	953.937				239.883	953.986				239.883	955.457				239.883	948.231				1071.52	950.15				1071.52	965.986
								270.396	954.343				270.396	954.656				270.396	956.162				270.396	948.566				1235.95	950.469				1235.95	967.284
								304.789	954.726				304.789	955.311				304.789	956.862				304.789	948.912				1425.61	950.777				1425.61	968.537
								343.558	955.085				343.558	955.947				343.558	957.552				343.558	949.269				1644.37	951.071				1644.37	969.735
								387.258	955.421				387.258	956.559				387.258	958.227				387.258	949.634				1896.71	951.349				1896.71	970.87
								436.516	955.733				436.516	957.144				436.516	958.883				436.516	950.004				2187.76	951.61				2187.76	971.937
								492.04	956.021				492.04	957.701				492.04	959.516				492.04	950.377				2523.48	951.853				2523.48	972.931
								554.626	956.286				554.626	958.227				554.626	960.122				554.626	950.751				2910.72	952.077				2910.72	973.85
								625.173	956.53				625.173	958.722				625.173	960.699				625.173	951.122				3357.38	952.283				3357.38	974.694
								704.693	956.752				704.693	959.184				704.693	961.246				704.693	951.487				3872.58	952.471				3872.58	975.465
								794.328	956.955				794.328	959.614				794.328	961.76				794.328	951.845				4466.84	952.641				4466.84	976.164
								895.365	957.139				895.365	960.012				895.365	962.242				895.365	952.193				5152.29	952.795				5152.29	976.795
								1009.25	957.306				1009.25	960.379				1009.25	962.69				1009.25	952.529				5942.92	952.933				5942.92	977.362
								1137.63	957.457				1137.63	960.717				1137.63	963.106				1137.63	952.852				6854.88	953.057				6854.88	977.87
								1282.33	957.593				1282.33	961.025				1282.33	963.49				1282.33	953.159				7906.79	953.167				7906.79	978.322
								1445.44	957.716				1445.44	961.307				1445.44	963.843				1445.44	953.45				9120.11	953.264				9120.11	978.724
								1629.3	957.826				1629.3	961.563				1629.3	964.167				1629.3	953.724				10519.6	953.351				10519.6	979.079
								1836.54	957.925				1836.54	961.796				1836.54	964.462				1836.54	953.982				12133.9	953.427				12133.9	979.393
								2070.14	958.014				2070.14	962.006				2070.14	964.731				2070.14	954.221				13995.9	953.494				13995.9	979.67
								2333.46	958.093				2333.46	962.196				2333.46	964.976				2333.46	954.444				16143.6	953.553				16143.6	979.914
								2630.27	958.164				2630.27	962.367				2630.27	965.197				2630.27	954.65				18620.9	953.605				18620.9	980.127
								2964.83	958.228				2964.83	962.522				2964.83	965.397				2964.83	954.839				21478.3	953.651				21478.3	980.315
								3341.95	958.284				3341.95	962.66				3341.95	965.578				3341.95	955.013				24774.2	953.69				24774.2	980.478
								3767.04	958.335				3767.04	962.785				3767.04	965.74				3767.04	955.172				28575.9	953.725				28575.9	980.622
								4246.2	958.38				4246.2	962.896				4246.2	965.887				4246.2	955.316				32961	953.756				32961	980.747
								4786.3	958.421				4786.3	962.996				4786.3	966.018				4786.3	955.448				38018.9	953.782				38018.9	980.856
								5395.11	958.456				5395.11	963.085				5395.11	966.135				5395.11	955.567				43853.1	953.805				43853.1	980.951
								6081.35	958.488				6081.35	963.165				6081.35	966.241				6081.35	955.675				50582.5	953.825				50582.5	981.034
								6854.88	958.517				6854.88	963.236				6854.88	966.335				6854.88	955.773				58344.5	953.843				58344.5	981.106
								7726.81	958.542				7726.81	963.299				7726.81	966.419				7726.81	955.86				67297.7	953.858				67297.7	981.169
								8709.64	958.565				8709.64	963.356				8709.64	966.495				8709.64	955.939				77624.7	953.871				77624.7	981.223
								9817.48	958.585				9817.48	963.407				9817.48	966.562				9817.48	956.01				89536.5	953.883				89536.5	981.271
								11066.2	958.602				11066.2	963.451				11066.2	966.622				11066.2	956.074				103276	953.893				103276	981.312
								12473.8	958.618				12473.8	963.492				12473.8	966.675				12473.8	956.131				119124	953.901				119124	981.348
								14060.5	958.632				14060.5	963.527				14060.5	966.723				14060.5	956.182				137404	953.909				137404	981.379
