# Supplementary material for: Small-molecule inhibitors of human mitochondrial DNA transcription
Source: Springer Nature journal article supplement (doi:10.1038/s41586-020-03048-z), 2020-12-16
Supplement: MOESM8 [file 41586_2020_3048_MOESM8_ESM.xlsx]

## Sheet: Ext 2 a
	ND1, 6h							ND1, 4d
DMSO	0.919468	1.09379	1.02448	1.34013			DMSO	1.00271	1.27136	0.99716	0.81
0.01μM	0.983882	1.01378	0.998326	0.924298			0.01μM	0.91383	1.02131	1.11947
0.05μM	0.618038	0.757587	0.82194	0.650262			0.05μM	0.82194	0.89683	1.07
0.1μM	0.450186	0.671093	0.651847	0.519606			0.1μM	0.44976	0.52441	0.41892	0.94
0.2μM	0.489893	0.724481	0.50726				0.2μM	0.13613	0.26228	0.42
0.5μM	0.233972	0.359713	0.205079				0.5μM	0.04535	0.03884	0.03131	0.12
1μM	0.155653	0.139242	0.205013	0.2013			1μM	0.02123	0.01909	0.01
5μM	0.074309	0.134341	0.0687574				5μM	0.00155	0.01204	0.0031	0.01
10μM	0.065617	0.065561	0.0631128	0.0559621			10μM	0.00274	0.01278
Ordinary Two-Way ANOVA, with Sidak's multiple comparisons test
ANOVA table	SS (Type III)	DF	MS	F (DFn, DFd)	P value
Interaction	0.3008	8	0.0376	F (8, 45) = 2,832	P=0,0124
Row Factor	9.424	8	1.178	F (8, 45) = 88,70	P<0,0001
Column Factor	0.07112	1	0.07112	F (1, 45) = 5,355	P=0,0253
Residual	0.5976	45	0.01328
Within each column, compare rows (simple effects within columns)
Number of families	2
Number of comparisons per family	8
Alpha	0.05
Sidak's multiple comparisons test	Predicted (LS) mean diff,	95,00% CI of diff,	Significant?	Summary	Adjusted P Value
ND1, 6h
DMSO vs. 0.01μM	0.1144	-0,1187 to 0,3475	No	ns	0.7687
DMSO vs. 0.05μM	0.3825	0,1494 to 0,6156	Yes	***	0.0002
DMSO vs. 0.1μM	0.5213	0,2882 to 0,7544	Yes	****	<0,0001
DMSO vs. 0.2μM	0.5206	0,2688 to 0,7724	Yes	****	<0,0001
DMSO vs. 0.5μM	0.8282	0,5764 to 1,080	Yes	****	<0,0001
DMSO vs. 1μM	0.9192	0,6861 to 1,152	Yes	****	<0,0001
DMSO vs. 5μM	1.002	0,7502 to 1,254	Yes	****	<0,0001
DMSO vs. 10μM	1.032	0,7988 to 1,265	Yes	****	<0,0001
ND1, 4d
DMSO vs. 0.01μM	0.002104	-0,2497 to 0,2539	No	ns	>0,9999
DMSO vs. 0.05μM	0.09072	-0,1611 to 0,3425	No	ns	0.9475
DMSO vs. 0.1μM	0.437	0,2039 to 0,6701	Yes	****	<0,0001
DMSO vs. 0.2μM	0.7475	0,4957 to 0,9993	Yes	****	<0,0001
DMSO vs. 0.5μM	0.9614	0,7283 to 1,195	Yes	****	<0,0001
DMSO vs. 1μM	1.004	0,7518 to 1,255	Yes	****	<0,0001
DMSO vs. 5μM	1.014	0,7805 to 1,247	Yes	****	<0,0001
DMSO vs. 10μM	1.013	0,7271 to 1,298	Yes	****	<0,0001	only 2

## Sheet: Ext  2 b
	Time (h)	COX1
	0	1.28	0.8	0.72	1.2	1.00273	1.00273	1.0066	1.0066
	4	0.6	1.07	0.709354	0.755015
	6	0.69	0.82	0.716986	0.791329
	24	0.53	0.66	0.56302	0.57858	0.514514	0.513089
	48	0.25	0.48	0.432071	0.431671	0.231945	0.266312
	72	0.25	0.46	0.156571	0.157296	0.126438	0.111401
	96	0.29	0.32	0.0963241	0.0866118
	144	0.143405	0.145609	0.136897
	192	0.0764327	0.0699435	0.0753804

## Sheet: Ext 2 e
		Basal (DMEM)				Leak (Oligomycin)				Max. Resp. (CCCP)
	DMSO	100	63	88	130	24	24	30	21	76	64	85	134
	0.01μM	97	72	76	75	27	35	59	54	73	65	95	64
	0.05μM	78	60	76	75	24	23	59	52	51	60	95	64
	0.1μM	57	53	72	64	20	25	55	44	43	47	88	48
	0.5μM	19	11	32	19	11	5	25	14	16	13	40	16
	1μM	15	13	21	17	9	5	17	13	11	13	20	13
	5μM	12	10	12	11	10	5	11	7	13	11	14	9
	10μM	6	10	9	12	7	4	5	8	13	14	4	8
	Ordinary Two-Way ANOVA, with Sidak's multiple comparisons test
	ANOVA table	SS (Type III)	DF	MS	F (DFn, DFd)	P value
	Interaction	9513	14	679.5	F (14, 72) = 3,817	P<0,0001
	Row Factor	60643	7	8663	F (7, 72) = 48,67	P<0,0001
	Column Factor	10046	2	5023	F (2, 72) = 28,22	P<0,0001
	Residual	12816	72	178
	Within each column, compare rows (simple effects within columns)
	Number of families	3
	Number of comparisons per family	7
	Alpha	0.05
	Sidak's multiple comparisons test	Mean Diff,	95,00% CI of diff,	Significant?	Summary	Adjusted P Value
	Basal (DMEM)
	DMSO vs. 0.01μM	15.25	-10,80 to 41,30	No	ns	0.559
	DMSO vs. 0.05μM	23	-3,050 to 49,05	No	ns	0.1146
	DMSO vs. 0.1μM	33.75	7,700 to 59,80	Yes	**	0.0044
	DMSO vs. 0.5μM	75	48,95 to 101,0	Yes	****	<0,0001
	DMSO vs. 1μM	78.75	52,70 to 104,8	Yes	****	<0,0001
	DMSO vs. 5μM	84	57,95 to 110,0	Yes	****	<0,0001
	DMSO vs. 10μM	86	59,95 to 112,0	Yes	****	<0,0001
	Leak (Oligomycin)
	DMSO vs. 0.01μM	-19	-45,05 to 7,050	No	ns	0.29
	DMSO vs. 0.05μM	-14.75	-40,80 to 11,30	No	ns	0.5988
	DMSO vs. 0.1μM	-11.25	-37,30 to 14,80	No	ns	0.8494
	DMSO vs. 0.5μM	11	-15,05 to 37,05	No	ns	0.8633
	DMSO vs. 1μM	13.75	-12,30 to 39,80	No	ns	0.6777
	DMSO vs. 5μM	16.5	-9,550 to 42,55	No	ns	0.4612
	DMSO vs. 10μM	18.75	-7,300 to 44,80	No	ns	0.3051
	Max. Resp. (CCCP)
	DMSO vs. 0.01μM	15.5	-10,55 to 41,55	No	ns	0.5391
	DMSO vs. 0.05μM	22.25	-3,800 to 48,30	No	ns	0.1385
	DMSO vs. 0.1μM	33.25	7,200 to 59,30	Yes	**	0.0052
	DMSO vs. 0.5μM	68.5	42,45 to 94,55	Yes	****	<0,0001
	DMSO vs. 1μM	75.5	49,45 to 101,5	Yes	****	<0,0001
	DMSO vs. 5μM	78	51,95 to 104,0	Yes	****	<0,0001
	DMSO vs. 10μM	80	53,95 to 106,0	Yes	****	<0,0001
	Test details	Mean 1	Mean 2	Mean Diff,	SE of diff,	N1	N2	t	DF
	Basal (DMEM)
	DMSO vs. 0.01μM	95.25	80	15.25	9.434	4	4	1.616	72
	DMSO vs. 0.05μM	95.25	72.25	23	9.434	4	4	2.438	72
	DMSO vs. 0.1μM	95.25	61.5	33.75	9.434	4	4	3.577	72
	DMSO vs. 0.5μM	95.25	20.25	75	9.434	4	4	7.95	72
	DMSO vs. 1μM	95.25	16.5	78.75	9.434	4	4	8.347	72
	DMSO vs. 5μM	95.25	11.25	84	9.434	4	4	8.904	72
	DMSO vs. 10μM	95.25	9.25	86	9.434	4	4	9.116	72
	Leak (Oligomycin)
	DMSO vs. 0.01μM	24.75	43.75	-19	9.434	4	4	2.014	72
	DMSO vs. 0.05μM	24.75	39.5	-14.75	9.434	4	4	1.563	72
	DMSO vs. 0.1μM	24.75	36	-11.25	9.434	4	4	1.192	72
	DMSO vs. 0.5μM	24.75	13.75	11	9.434	4	4	1.166	72
	DMSO vs. 1μM	24.75	11	13.75	9.434	4	4	1.457	72
	DMSO vs. 5μM	24.75	8.25	16.5	9.434	4	4	1.749	72
	DMSO vs. 10μM	24.75	6	18.75	9.434	4	4	1.987	72
	Max. Resp. (CCCP)
	DMSO vs. 0.01μM	89.75	74.25	15.5	9.434	4	4	1.643	72
	DMSO vs. 0.05μM	89.75	67.5	22.25	9.434	4	4	2.358	72
	DMSO vs. 0.1μM	89.75	56.5	33.25	9.434	4	4	3.524	72
	DMSO vs. 0.5μM	89.75	21.25	68.5	9.434	4	4	7.261	72
	DMSO vs. 1μM	89.75	14.25	75.5	9.434	4	4	8.003	72
	DMSO vs. 5μM	89.75	11.75	78	9.434	4	4	8.268	72
	DMSO vs. 10μM	89.75	9.75	80	9.434	4	4	8.48	72

## Sheet: Ext 2 f
HeLa
	IMT1					IMT1B
0.01uM	1.11814	1.12653				0.944132	1.11408	0.886737
0.05uM	0.252624	0.307947				0.553855	0.556739	0.604418
0.1uM	0.581202	0.506869	0.316852	0.382719	0.427398	0.33671	0.330194	0.124954	0.217337	0.220012
0.2uM	0.45709	0.536711	0.519742			0.350886	0.372325	0.420318
0.5uM	0.394122	0.252903	0.310542			0.316803	0.200035	0.221567
1uM	0.201277	0.167061	0.234928			0.197086	0.177	0.129658
5uM	0.233481	0.0715233	0.239036			0.210886	0.147074	0.249037
10uM	0.0772201	0.0925294	0.0871358			0.25221	0.139236	0.133828
DMSO	1.14682	1.17669	1.07084	0.855141	0.750502	1.1362	1.15982	1.26482	0.766473	0.672683
A2780
	IMT1					IMT1B
0.01uM	1.89306	0.787205	1.72007			0.67669	1.82778	2.23538	1.60815
0.05uM	1.28148	1.33577	1.4224			0.334821	0.569015	0.564847	1.08102	1.48491	1.20689
0.1uM	0.925958	1.08681				0.917099	0.898945	0.848133	0.898945	0.848133
0.2uM	0.414808	0.752834	0.698195			0.957829	0.975049	1.01192	0.632917	0.556694
0.5uM	0.474441	0.384731	0.729921			0.656596	0.609972	0.754467	0.411102	0.393187	0.476274
1uM	0.335614	0.346452	0.342698	0.301083	0.33667	0.56559	0.529874	0.634197	0.468398	0.466342	0.446014
5uM	0.259559	0.236975	0.361955			0.462944	0.452208	0.519998	0.409499	0.393739	0.339262
10uM	0.348641	0.302427	0.265067			0.390376	0.357294	0.428885	0.388018	0.620438	0.364155
DMSO	1.9416	1.89144	2.51876	2.05915	1.78585	2.7114	2.76609	2.98388	2.66431	2.50785	2.82839
