# Supplementary material for: Small-molecule inhibitors of human mitochondrial DNA transcription
Source: Springer Nature journal article supplement (doi:10.1038/s41586-020-03048-z), 2020-12-16
Supplement: MOESM9 [file 41586_2020_3048_MOESM9_ESM.xlsx]

## Sheet: Ext 3 f
HeLa																																				A2780
		DMSO																	IMT1					IMT1B					Con IMT									DMSO
	18S	1.3087	1.22994	1.2108	0.838807	0.788499	0.698828	0.867937	1.30819	1.02899	1.05266	0.944271	0.955885	0.976551	1.00186	0.963413	0.899163	0.925497	1.32905	1.18422	0.958481	0.909244	0.946677	0.765462	0.867553	0.892854	1.09173	0.838595	1.15263	0.772506	0.372406	0.939418					18S	1.18372	1.15758	1.19328	1.16514	0.720122	0.790059	1.16499	1.08248	1.15295	1.05724	0.903928	1.13542
	28S	1.17109	1.13227	1.1314	0.955944	0.80862	0.92706	0.931243	0.980717	1.01421	1.01986	0.917047	0.947651	1.07749	0.994769	0.981162	0.998313	1.01115	1.2533	1.15071	0.960039	0.879008	0.977315	0.859292	0.892903	0.972236	1.04641	0.970361	1.28796	0.696228	0.536607	0.896515					28S	1.17183	1.08808	1.0934	1.52201	0.705022	0.815009	1.05882	0.946812	1.40018	0.994114	0.967421	1.03001
	5S	1.12862	1.23792	1.35581	1.15821	0.565197	0.649773	0.433864	0.655289	1.05501	0.900147	0.880692	1.08302	0.993126	0.928561	1.29022	1.45228	1.23226	1.37184	1.29698	0.872381	0.587872	0.731229	0.834768	0.772502	0.830207	1.1441	0.685327	0.591493	0.733378	0.484308	0.678292					5S	1.16792	0.830732	1.04979	1.54031	0.957278	0.904597	0.737336	1.03435	1.27938	0.89798	1.30551	1.04225
	ACTB	0.970169	0.913166	1.04211	0.966563	1.09875	0.895754	1.30315	1.25714	1.02276	0.874268	0.950002	0.974688	0.947557	1.01373	0.903517	0.904546	0.962131	1.02889	1.04017	1.03871	1.0592	1.03762	1.00111	1.27198	1.02023	1.17135	1.06831	1.44841	1.13621	1.25938	1.11375					ACTB	1.0937	0.978885	0.976905	1.10618	1.0592	1.05114	0.880091	0.695265	1.02816	1.02746	1.04813	1.13314
	POLRMT	1.18905	1.0197	1.13678	1.02732	1.11921	0.871789	1.10834	1.16088	1.00728	0.948133	0.905832	0.979409	0.891218	0.921389	0.956222	0.84479	0.912663	1.02304	0.858117	0.888425	0.871174	0.908829	0.936166	1.06282	0.881428	0.877527	0.933869	0.328667	1.2398	0.936766	0.80263	0.886596				POLRMT	1.25882	1.16243	1.19843	1.26686	0.660115	0.674829	1.11516	1.17848	1.23475	1.16215	0.849899	1.06291
	ND1	0.860133	0.851165	0.788816	1.04794	1.23504	1.00831	1.19902	1.33589	0.938582	0.879618	0.983296	0.946778	0.965503	0.967853	1.02134	0.900811	1.06992	0.0711245	0.0711543	0.102565	0.0977266	0.134759	0.28947	0.197049	0.0614509	0.076411	0.0659017	0.845303	0.651956	0.904014	1.17038	0.91596				ND1	1.26264	1.25913	1.21437	0.885393	0.721707	0.703503	1.02257	0.980372	1.24957	1.18335	0.967108	1.28599
	CytB	0.813721	0.823455	0.862921	0.994004	1.1388	1.18855	1.38097	1.42704	0.856589	0.945981	0.925741	0.975549	0.858949	0.953773	0.938851	0.835677	1.07943	0.145975	0.158638	0.323372	0.344672	0.368614	0.344457	0.256848	0.298587	0.38096	0.309394	0.936589	0.713316	0.977379	1.21472	1.13221				CytB	1.35797	1.34096	1.25603	0.817145	0.644818	0.692337	1.23918	1.20617	1.21887	1.21537	0.965367	1.16374
	COX1	0.786173	0.806457	0.959023	0.98234	1.08666	1.09315	1.33133	1.2491	0.939054	0.925862	0.974559	1.02506	0.946491	1.00389	0.934948	0.868697	1.0872	0.380778	0.418384	0.482647	0.511981	0.511043	0.449562	0.441748	0.476172	0.541175	0.535231	1.39694	0.98007	0.947631	1.27517	1.06476				COX1	1.26882	1.29246	1.29686	0.939422	0.626736	0.628445	1.10519	1.14127	1.25913	1.1202	0.994044	1.42838
																																					Ordinary Two-Way ANOVA, with Sidak's multiple comparisons test
	Ordinary Two-Way ANOVA, with Sidak's multiple comparisons test
																																					ANOVA table	SS (Type III)	DF	MS	F (DFn, DFd)	P value
	ANOVA table	SS (Type III)	DF	MS	F (DFn, DFd)	P value																															Interaction	9.298	21	0.4427	F (21, 208) = 6,622	P<0,0001
	Interaction	7.881	21	0.3753	F (21, 220) = 13,00	P<0,0001																															Row Factor	7.483	7	1.069	F (7, 208) = 15,99	P<0,0001
	Row Factor	5.556	7	0.7937	F (7, 220) = 27,49	P<0,0001																															Column Factor	3.075	3	1.025	F (3, 208) = 15,33	P<0,0001
	Column Factor	3.946	3	1.315	F (3, 220) = 45,55	P<0,0001																															Residual	13.91	208	0.06685
	Residual	6.353	220	0.02888
	Within each row, compare columns (simple effects within rows)																																				Within each row, compare columns (simple effects within rows)
	Number of families	8																																			Number of families	8
	Number of comparisons per family	3																																			Number of comparisons per family	3
	Alpha	0.05																																			Alpha	0.05
	Sidak's multiple comparisons test	Predicted (LS) mean diff,	95,00% CI of diff,	Significant?	Summary	Adjusted P Value																															Sidak's multiple comparisons test	Predicted (LS) mean diff,	95,00% CI of diff,	Significant?	Summary	Adjusted P Value
	18S																																				18S
	DMSO vs. IMT1	-0.06553	-0,2735 to 0,1425	No	ns	0.8329																															DMSO vs. IMT1	-0.2664	-0,5831 to 0,05021	No	ns	0.1266
	DMSO vs. IMT1B	0.1088	-0,09925 to 0,3168	No	ns	0.5064																															DMSO vs. IMT1B	0.1919	-0,1248 to 0,5085	No	ns	0.3775
	DMSO vs. Con IMT	0.1908	-0,03645 to 0,4180	No	ns	0.1279																															DMSO vs. Con IMT	0.2824	-0,03427 to 0,5990	No	ns	0.0957
	28S																																				28S
	DMSO vs. IMT1	-0.04407	-0,2521 to 0,1639	No	ns	0.941																															DMSO vs. IMT1	-0.1572	-0,4738 to 0,1595	No	ns	0.5497
	DMSO vs. IMT1B	0.05176	-0,1562 to 0,2598	No	ns	0.9089																															DMSO vs. IMT1B	-0.489	-0,8787 to -0,09923	Yes	**	0.0085
	DMSO vs. Con IMT	0.1457	-0,08154 to 0,3729	No	ns	0.3286																															DMSO vs. Con IMT	0.2643	-0,05238 to 0,5809	No	ns	0.1313
	5S																																				5S
	DMSO vs. IMT1	0.02794	-0,1801 to 0,2359	No	ns	0.9838																															DMSO vs. IMT1	0.0964	-0,2202 to 0,4130	No	ns	0.8464
	DMSO vs. IMT1B	0.1466	-0,06139 to 0,3546	No	ns	0.2497																															DMSO vs. IMT1B	-0.5619	-0,9517 to -0,1722	Yes	**	0.0019
	DMSO vs. Con IMT	0.3781	0,1509 to 0,6053	Yes	***	0.0003																															DMSO vs. Con IMT	0.2237	-0,09296 to 0,5403	No	ns	0.2478
	ACTB																																				ACTB
	DMSO vs. IMT1	-0.04092	-0,2489 to 0,1671	No	ns	0.952																															DMSO vs. IMT1	0.05302	-0,2636 to 0,3697	No	ns	0.9694
	DMSO vs. IMT1B	-0.1066	-0,3146 to 0,1014	No	ns	0.5234																															DMSO vs. IMT1B	0.2691	-0,04753 to 0,5857	No	ns	0.1209
	DMSO vs. Con IMT	-0.2394	-0,4667 to -0,01222	Yes	*	0.0353																															DMSO vs. Con IMT	-0.0173	-0,3339 to 0,2993	No	ns	0.9989
	POLRMT																																				POLRMT
	DMSO vs. IMT1	0.09008	-0,1179 to 0,2981	No	ns	0.6549																															DMSO vs. IMT1	-0.1346	-0,4512 to 0,1821	No	ns	0.6679
	DMSO vs. IMT1B	0.06164	-0,1464 to 0,2696	No	ns	0.8566																															DMSO vs. IMT1B	-0.1159	-0,4617 to 0,2300	No	ns	0.8058
	DMSO vs. Con IMT	0.1611	-0,04690 to 0,3691	No	ns	0.1792																															DMSO vs. Con IMT	0.4104	0,02064 to 0,8001	Yes	*	0.0356
	ND1																																				ND1
	DMSO vs. IMT1	0.9045	0,6965 to 1,113	Yes	****	<0,0001																															DMSO vs. IMT1	0.8276	0,5110 to 1,144	Yes	****	<0,0001
	DMSO vs. IMT1B	0.8619	0,6539 to 1,070	Yes	****	<0,0001																															DMSO vs. IMT1B	0.7704	0,4245 to 1,116	Yes	****	<0,0001
	DMSO vs. Con IMT	0.1025	-0,1055 to 0,3105	No	ns	0.5561																															DMSO vs. Con IMT	0.3811	-0,008677 to 0,7708	No	ns	0.0574
	CytB																																				CytB
	DMSO vs. IMT1	0.7317	0,5237 to 0,9398	Yes	****	<0,0001																															DMSO vs. IMT1	0.6959	0,3792 to 1,013	Yes	****	<0,0001
	DMSO vs. IMT1B	0.682	0,4739 to 0,8900	Yes	****	<0,0001																															DMSO vs. IMT1B	0.6322	0,2863 to 0,9781	Yes	****	<0,0001
	DMSO vs. Con IMT	0.005156	-0,2029 to 0,2132	No	ns	0.9999																															DMSO vs. Con IMT	0.4218	0,03209 to 0,8116	Yes	*	0.0292
	COX1																																				COX1
	DMSO vs. IMT1	0.539	0,3310 to 0,7470	Yes	****	<0,0001																															DMSO vs. IMT1	0.5062	0,1895 to 0,8228	Yes	***	0.0005
	DMSO vs. IMT1B	0.5112	0,3032 to 0,7192	Yes	****	<0,0001																															DMSO vs. IMT1B	0.5474	0,2015 to 0,8933	Yes	***	0.0005
	DMSO vs. Con IMT	-0.1329	-0,3409 to 0,07509	No	ns	0.3315																															DMSO vs. Con IMT	0.4412	0,05147 to 0,8310	Yes	*	0.0208
	Test details	Predicted (LS) mean 1	Predicted (LS) mean 2	Predicted (LS) mean diff,	SE of diff,	N1	N2	t	DF																												Test details	Predicted (LS) mean 1	Predicted (LS) mean 2	Predicted (LS) mean diff,	SE of diff,	N1	N2	t	DF
	18S																																				18S
	DMSO vs. IMT1	1	1.066	-0.06553	0.08645	17	5	0.758	220																												DMSO vs. IMT1	1	1.266	-0.2664	0.1315	17	5	2.025	208
	DMSO vs. IMT1B	1	0.8912	0.1088	0.08645	17	5	1.258	220																												DMSO vs. IMT1B	1	0.8081	0.1919	0.1315	17	5	1.459	208
	DMSO vs. Con IMT	1	0.8092	0.1908	0.09443	17	4	2.02	220																												DMSO vs. Con IMT	1	0.7176	0.2824	0.1315	17	5	2.147	208
	28S																																				28S
	DMSO vs. IMT1	1	1.044	-0.04407	0.08645	17	5	0.5098	220																												DMSO vs. IMT1	1	1.157	-0.1572	0.1315	17	5	1.195	208
	DMSO vs. IMT1B	1	0.9482	0.05176	0.08645	17	5	0.5987	220																												DMSO vs. IMT1B	1	1.489	-0.489	0.1619	17	3	3.02	208
	DMSO vs. Con IMT	1	0.8543	0.1457	0.09443	17	4	1.543	220																												DMSO vs. Con IMT	1	0.7357	0.2643	0.1315	17	5	2.009	208
	5S																																				5S
	DMSO vs. IMT1	1	0.9721	0.02794	0.08645	17	5	0.3232	220																												DMSO vs. IMT1	1	0.9036	0.0964	0.1315	17	5	0.7328	208
	DMSO vs. IMT1B	1	0.8534	0.1466	0.08645	17	5	1.696	220																												DMSO vs. IMT1B	1	1.562	-0.5619	0.1619	17	3	3.471	208
	DMSO vs. Con IMT	1	0.6219	0.3781	0.09443	17	4	4.004	220																												DMSO vs. Con IMT	1	0.7763	0.2237	0.1315	17	5	1.7	208
	ACTB																																				ACTB
	DMSO vs. IMT1	1	1.041	-0.04092	0.08645	17	5	0.4733	220																												DMSO vs. IMT1	1	0.947	0.05302	0.1315	17	5	0.4031	208
	DMSO vs. IMT1B	1	1.107	-0.1066	0.08645	17	5	1.233	220																												DMSO vs. IMT1B	1	0.7309	0.2691	0.1315	17	5	2.046	208
	DMSO vs. Con IMT	1	1.239	-0.2394	0.09443	17	4	2.535	220																												DMSO vs. Con IMT	1	1.017	-0.0173	0.1315	17	5	0.1315	208
	POLRMT																																				POLRMT
	DMSO vs. IMT1	1	0.9099	0.09008	0.08645	17	5	1.042	220																												DMSO vs. IMT1	1	1.135	-0.1346	0.1315	17	5	1.023	208
	DMSO vs. IMT1B	1	0.9384	0.06164	0.08645	17	5	0.713	220																												DMSO vs. IMT1B	1	1.116	-0.1159	0.1437	17	4	0.8064	208
	DMSO vs. Con IMT	1	0.8389	0.1611	0.08645	17	5	1.864	220																												DMSO vs. Con IMT	1	0.5896	0.4104	0.1619	17	3	2.535	208
	ND1																																				ND1
	DMSO vs. IMT1	1	0.09547	0.9045	0.08645	17	5	10.46	220																												DMSO vs. IMT1	1	0.1724	0.8276	0.1315	17	5	6.292	208
	DMSO vs. IMT1B	1	0.1381	0.8619	0.08645	17	5	9.97	220																												DMSO vs. IMT1B	1	0.2296	0.7704	0.1437	17	4	5.362	208
	DMSO vs. Con IMT	1	0.8975	0.1025	0.08645	17	5	1.185	220																												DMSO vs. Con IMT	1	0.6189	0.3811	0.1619	17	3	2.354	208
	CytB																																				CytB
	DMSO vs. IMT1	1	0.2683	0.7317	0.08645	17	5	8.464	220																												DMSO vs. IMT1	1	0.3041	0.6959	0.1315	17	5	5.29	208
	DMSO vs. IMT1B	1	0.318	0.682	0.08645	17	5	7.888	220																												DMSO vs. IMT1B	1	0.3678	0.6322	0.1437	17	4	4.4	208
	DMSO vs. Con IMT	1	0.9948	0.005156	0.08645	17	5	0.05964	220																												DMSO vs. Con IMT	1	0.5782	0.4218	0.1619	17	3	2.605	208
	COX1																																				COX1
	DMSO vs. IMT1	1	0.461	0.539	0.08645	17	5	6.235	220																												DMSO vs. IMT1	1	0.4938	0.5062	0.1315	17	5	3.848	208
	DMSO vs. IMT1B	1	0.4888	0.5112	0.08645	17	5	5.913	220																												DMSO vs. IMT1B	1	0.4526	0.5474	0.1437	17	4	3.81	208
	DMSO vs. Con IMT	1	1.133	-0.1329	0.08645	17	5	1.537	220																												DMSO vs. Con IMT	1	0.5588	0.4412	0.1619	17	3	2.725	208
[truncated: 20 more columns]

## Sheet: Ext 3 j
0 µM ConIMT (SC-6238532)			10 µM ConIMT (SC-6238532)
Temperature (°C)	Fnorm (A. U.)		Temperature (°C)	Fnorm (A. U.)
4	0.0479		4	0.1411		Values given are Mean values
4.5	0.0448		4.5	0.1357
5	0.0417		5	0.1302
5.5	0.0386		5.5	0.1248
6	0.0355		6	0.1193
6.5	0.0324		6.5	0.1139
7	0.0294		7	0.1085
7.5	0.0263		7.5	0.1032
8	0.0235		8	0.0983
8.5	0.0209		8.5	0.0936
9	0.0185		9	0.089
9.5	0.0162		9.5	0.0845
10	0.0139		10	0.0802
10.5	0.0119		10.5	0.0761
11	0.0098454		11	0.0722
11.5	0.0078931		11.5	0.0688
12	0.005987		12	0.0658
12.5	0.0044588		12.5	0.0631
13	0.0029767		13	0.0607
13.5	0.0018473		13.5	0.0585
14	0.0010202		14	0.0565
14.5	0.00057519		14.5	0.0547
15	0.00017634		15	0.053
15.5	0		15.5	0.0514
16	4.1985e-06		16	0.0499
16.5	0.00023511		16.5	0.0486
17	0.00060038		17	0.0474
17.5	0.0012176		17.5	0.0464
18	0.0020992		18	0.0457
18.5	0.0031321		18.5	0.0453
19	0.0042866		19	0.0451
19.5	0.0056595		19.5	0.045
20	0.0073893		20	0.0451
20.5	0.009329		20.5	0.0452
21	0.0116		21	0.0456
21.5	0.0143		21.5	0.0463
22	0.0174		22	0.0474
22.5	0.0208		22.5	0.049
23	0.0247		23	0.0511
23.5	0.0291		23.5	0.0536
24	0.0339		24	0.0568
24.5	0.0395		24.5	0.0605
25	0.0459		25	0.0648
25.5	0.053		25.5	0.0698
26	0.0606		26	0.0755
26.5	0.0692		26.5	0.082
27	0.0783		27	0.0893
27.5	0.088		27.5	0.0974
28	0.0984		28	0.1066
28.5	0.1098		28.5	0.1171
29	0.1223		29	0.1291
29.5	0.1361		29.5	0.1427
30	0.1512		30	0.1581
30.5	0.1676		30.5	0.1754
31	0.1852		31	0.1943
31.5	0.2041		31.5	0.215
32	0.2242		32	0.2376
32.5	0.246		32.5	0.2624
33	0.2694		33	0.2893
33.5	0.2949		33.5	0.3192
34	0.3228		34	0.3521
34.5	0.353		34.5	0.3882
35	0.3857		35	0.4277
35.5	0.4211		35.5	0.4706
36	0.4586		36	0.5159
36.5	0.4981		36.5	0.5634
37	0.5394		37	0.6123
37.5	0.582		37.5	0.6616
38	0.6255		38	0.7103
38.5	0.6699		38.5	0.7579
39	0.7144		39	0.803
39.5	0.7582		39.5	0.8447
40	0.8004		40	0.8819
40.5	0.8402		40.5	0.9141
41	0.8763		41	0.9405
41.5	0.9082		41.5	0.9616
42	0.9352		42	0.9774
42.5	0.9571		42.5	0.9886
43	0.974		43	0.9957
43.5	0.9862		43.5	0.9994
44	0.9941		44	1
44.5	0.9985		44.5	0.998
45	1		45	0.9936
45.5	0.999		45.5	0.9871
46	0.996		46	0.9787
46.5	0.9915		46.5	0.9685
47	0.9855		47	0.957
47.5	0.9783		47.5	0.9439
48	0.9703		48	0.9296
48.5	0.9612		48.5	0.9141
49	0.9514		49	0.8973
49.5	0.9407		49.5	0.8791
50	0.929		50	0.8595
50.5	0.9161		50.5	0.8381
51	0.9019		51	0.8149
51.5	0.8862		51.5	0.7897
52	0.8687		52	0.7626
52.5	0.8496		52.5	0.7336
53	0.8289		53	0.7027
53.5	0.8065		53.5	0.6704
54	0.7826		54	0.6369
54.5	0.7575		54.5	0.6026
55	0.7314		55	0.5679
55.5	0.7047		55.5	0.5333
56	0.6778		56	0.4994
56.5	0.6513		56.5	0.4668
57	0.6256		57	0.4362
57.5	0.6013		57.5	0.408
58	0.5787		58	0.3828
58.5	0.558		58.5	0.3604
59	0.5393		59	0.3406
59.5	0.5222		59.5	0.3228
60	0.5065		60	0.3066
60.5	0.4919		60.5	0.2911
61	0.4781		61	0.2764
61.5	0.4653		61.5	0.2625
62	0.4535		62	0.2492
62.5	0.4421		62.5	0.237
63	0.4314		63	0.2258
63.5	0.4207		63.5	0.2155
64	0.4098		64	0.206
64.5	0.3985		64.5	0.1971
65	0.3871		65	0.1887
65.5	0.3758		65.5	0.1807
66	0.3649		66	0.1731
66.5	0.3548		66.5	0.166
67	0.3456		67	0.1595
67.5	0.3372		67.5	0.1536
68	0.3297		68	0.1486
68.5	0.3229		68.5	0.1445
69	0.3169		69	0.1412
69.5	0.3117		69.5	0.1386
70	0.3072		70	0.1368
70.5	0.3032		70.5	0.1354
71	0.2998		71	0.1345
71.5	0.2969		71.5	0.1342
72	0.2947		72	0.1344
72.5	0.2932		72.5	0.1352
73	0.2927		73	0.1367
73.5	0.2928		73.5	0.1388
74	0.2939		74	0.1413
74.5	0.2956		74.5	0.144
75	0.2978		75	0.1471
75.5	0.3002		75.5	0.1503
76	0.3032		76	0.1535
76.5	0.3062		76.5	0.1566
77	0.3096		77	0.1597
77.5	0.3132		77.5	0.1625
78	0.3171		78	0.1651
78.5	0.3209		78.5	0.1672
79	0.3249		79	0.1688
79.5	0.3289		79.5	0.1696
80	0.3328		80	0.1695
80.5	0.3367		80.5	0.1684
81	0.3408		81	0.1662
81.5	0.3446		81.5	0.1632
82	0.3483		82	0.1592
82.5	0.3516		82.5	0.1544
83	0.3546		83	0.149
83.5	0.3568		83.5	0.1433
84	0.3583		84	0.1373
84.5	0.3591		84.5	0.1312
85	0.3591		85	0.1251
85.5	0.3582		85.5	0.1191
86	0.3567		86	0.113
86.5	0.3546		86.5	0.1069
87	0.3519		87	0.101
87.5	0.3486		87.5	0.0951
88	0.3446		88	0.0891
88.5	0.3399		88.5	0.0831
89	0.3346		89	0.0768
89.5	0.3287		89.5	0.0704
90	0.3223		90	0.0639
90.5	0.3156		90.5	0.0572
91	0.3083		91	0.0507
91.5	0.3005		91.5	0.0442
92	0.2924		92	0.0377
92.5	0.2838		92.5	0.0313
93	0.2748		93	0.025
93.5	0.2656		93.5	0.0186
94	0.2558		94	0.0123
94.5	0.246		94.5	0.0061341
95	0.2353		95	0

## Sheet: Ext 3 l
Linear LSP			Supercoiled LSP
[ConIMT]	Band Intensity (A.U.)		[ConIMT]	Band Intensity (A.U.)
0.0001	88716.2		0.0001	50667.7
0.001	89266.5		0.001	48514.4
0.01	91750.3		0.01	49864.3
0.1	93228.6		0.1	48215.3
1	89112.7		1	49151.8
10	90439.3		10	48430.8
Values given are Mean values

## Sheet: Ext 3 m
	Con IMT	ND1					CytB
	DMSO	0.830976	0.948256	0.696097	1.3446	1.18007	0.954354	0.998493	0.709001	1.20129	1.13686
	10uM	0.354435	0.68967	0.223539	1.06931	1.08834	0.871669	0.761678	0.94664	1.03208	1.01742
	5uM	1.01255	0.958637	0.70937	0.205352	0.689919	0.903126	0.96489	0.770559	0.779966	0.843041
	1uM	0.705427	0.701594	0.793329			0.816004	0.820991	0.946592
	0.5uM	0.934132	0.659911	0.922551			1.37947	0.740646	1.1818
	0.1uM	0.645874	0.382223	0.786851	0.893281		0.812537	0.952886	1.00381	0.948795
	0.05uM	0.257947	0.75932	0.881832			0.945772	0.783951	0.945733
	0.01uM	0.844505	0.751949	0.920303			0.97328	0.908091	0.970821

## Sheet: Ext 3 n
	Con IMT	COX1
	DMSO	0.644755	0.953163	0.936542	1.54388	0.921655
	24	0.845108	1.18714	0.956152
	48	0.946543	1.26379	1.03285
	72	0.999304	0.869839	1.19523	0.848295
	96	0.976088	1.33706	0.957569
