# Supplementary material for: Small-molecule inhibitors of human mitochondrial DNA transcription
Source: Springer Nature journal article supplement (doi:10.1038/s41586-020-03048-z), 2020-12-16
Supplement: MOESM10 [file 41586_2020_3048_MOESM10_ESM.xlsx]

## Sheet: Ext 4 c
L816Q					A821V
Linear LSP		Supercoiled LSP			Linear LSP		Supercoiled LSP
[IMT1B]	Band Intensity (A.U.)	[IMT1B]	Band Intensity (A.U.)		[IMT1B]	Band Intensity (A.U.)	[IMT1B]	Band Intensity (A.U.)
0.0001	2232.05	0.0001	687		0.0001	7202.16	0.0001	1988.78
0.001	1901.81	0.001	789		0.001	5950.46	0.001	2132.36
0.01	1720.53	0.01	888.47		0.01	7922.37	0.01	1501.09
0.1	2004.08	0.1	847.29		0.1	6631.46	0.1	2123.68
1	2055.69	1	956.7		1	8311.88	1	2107.47
10	2014.43	10	834.37		10	6649.29	10	1735.76
Values given are Mean values

## Sheet: Ext 4 f
[WT] (nM)	Band Intensity (A.U.)		[L816Q] (nM)	Band Intensity (A.U.)		[A821V] (nM)	Band Intensity (A.U.)
0	0		0	0		0	0
250	323.5		250	378.72		250	440.22
500	256.29		500	634.46		500	1157.82
1000	330.61		1000	830.88		1000	2926.09
2000	333.46		2000	1354.18		2000	3669.97
Values given are Mean values

## Sheet: Ext 4 h
	WT									796-4									796-111									816-13									816-114
DMSO	0.684364	0.749056	0.655019	1.0583	0.803003	1.71277	0.922712	1.10153	1.31325	0.503099	0.648598	0.604751	0.611131	0.639219	0.74349	0.924844	0.788868	0.674067	0.878739	0.921886	0.789512	0.845855	0.905327	1.10413	0.979004	0.817414	0.994909	0.786079	0.780283	1.00873	1.06106	0.973447	0.990144	0.890247			0.864787	0.667442	0.663799	0.661776	0.667516	0.766513	0.870894
IMT1	0.0780156	0.221761	0.114394	0.200425	0.214422	0.228896	0.129579	0.129904	0.167553	0.393953	0.605645	0.43908	0.643229	0.574967	0.685757	0.581346	0.533857		0.583102	0.543051	0.614356	0.670992	0.718294	0.802448	0.852414	0.664112	0.702745	0.69368	0.541127	1.28842	0.843878	0.647847	0.801751	1.08947	1.1732		0.609412	0.759573	0.92257	0.71336	0.706178	0.658065	1.35486	0.859971
	Compare each cell mean with the other cell mean in that column
	Number of families	1
	Number of comparisons per family	5
	Alpha	0.05
	Sidak's multiple comparisons test	Predicted (LS) mean diff,	95,00% CI of diff,	Significant?	Summary	Adjusted P Value
	DMSO - IMT1
	WT	0.835	0,6120 to 1,058	Yes	****	<0,0001
	796-4	0.1248	-0,1051 to 0,3546	No	ns	0.5731
	796-111	0.2317	0,008689 to 0,4547	Yes	*	0.038
	816-13	0.04222	-0,2026 to 0,2871	No	ns	0.9948
	816-114	-0.08547	-0,3303 to 0,1594	No	ns	0.8929
	Test details	Predicted (LS) mean 1	Predicted (LS) mean 2	Predicted (LS) mean diff,	SE of diff,	N1	N2	t	DF
	DMSO - IMT1
	WT	1	0.165	0.835	0.08456	9	9	9.875	73
	796-4	0.682	0.5572	0.1248	0.08716	9	8	1.432	73
	796-111	0.9152	0.6835	0.2317	0.08456	9	9	2.74	73
	816-13	0.9271	0.8849	0.04222	0.09284	7	8	0.4548	73
	816-114	0.7375	0.823	-0.08547	0.09284	7	8	0.9206	73
