# Supplementary material for: Small-molecule inhibitors of human mitochondrial DNA transcription
Source: Springer Nature journal article supplement (doi:10.1038/s41586-020-03048-z), 2020-12-16
Supplement: MOESM11 [file 41586_2020_3048_MOESM11_ESM.xlsx]

## Sheet: Ext  6 a
			NT		siEGFP		siPOLRMT
			Exp. 1	Exp. 2	Exp. 1	Exp. 2	Exp. 1	Exp. 2
		Day 0	0.5	0.5	0.5	0.5	0.5	0.5
		Day 4	3.11	2.40333	2.565	2.48667	1.53	1.29333

## Sheet: Ext 6 c
		Origin	Cell line	IC50 (µM)
		bladder	5637	0.724529
			CLS439	30
			J82	30
			T24	30
			UMUC3	0.107947
		bone	MG63	30
			MHHES1	30
			RDES	30
			SAOS2	30
			U2OS	30
		brain	SF295	0.100549
			SKNAS	30
			SKNSH	30
			SNB75	30
			U87MG	30
		breast	BT20	30
			HS578T	30
			JIMT1	0.477958
			MCF7	30
			MDAMB231	30
			MDAMB436	0.561355
			MDAMB468	0.12565
			SKBR3	30
		cervix	C33A	0.420837
			CASKI	30
			HELA	0.838487
		colon	CACO2	0.150185
			COLO205	0.264544
			COLO678	30
			DLD1	0.028895
			HCT116	30
			HCT15	0.0542757
			HT29	1.22296
			LOVO	30
			SW620	0.217599
		connective tissue	HT1080	0.0708646
		hematological	GRANTA-519	30
			HL-60	0.533639
			K-562	30
			KASUMI-1	30
			L-363	30
			MINO	30
			MV4-11	0.964459
			PBMC	30
			RAMOS	0.318152
			SU-DHL-10	1.74011
			SU-DHL-6	30
			THP-1	30
			WSU-NHL	30
		kidney	786O	30
			ACHN	30
			CAKI1	30
			HEK293	0.682162
			UO31	30
		liver	HEPG2	0.122739
			PLCPRF5	2.83987
			SKHEP1	0.189002
		lung	A549	0.642585
			CALU6	30
			IMR90	30
			NCIH292	30
			NCIH358M	30
			NCIH460	0.0411804
			NCIH82	30
		muscle	A204	0.208824
			A673	30
			HS729	30
			RD	30
		ovary	A2780	0.0577433
			EFO21	2.60382
			IGROV1	30
			OVCAR3	2.23456
			OVCAR4	0.244379
			SKOV3	30
		pancreas	ASPC1	30
			BXPC3	0.27088
			MIAPACA2	0.0776921
			PANC1	0.790134
			PANC1005	30
		placenta	JAR	0.0432128
			JEG3	0.301804
		prostate	22RV1	0.824871
			DU145	30
			PC3	30
		skin	A375	30
			A431	30
			SKMEL28	30
			SKMEL5	1.49924
		vulva	SKLMS1	30

## Sheet: Ext  6 d
	Conc IMT	HeLa	A549	IMR90
	0.0001µM	100	97	99
	0.001µM	101	97	94
	0.01µM	101	97	93
	0.1µM	85	93	92
	1µM	48	46	85
	10µM	41	43	84

## Sheet: Ext 6 e
		hPBMCs							Hepatocytes
		Conc IMT	Donor 1		Donor 2				Conc IMT
		29.928	97.1	126.6	70.2	85.9			29.928	102.9	95.8
		10.689	90.1	87.9	85.9	87.8			10.689	109.7	101.8
		4.275	100.8	120.9	99.6	99.7			4.275	109	107.5
		2.1378	105.2	136.9	85.6	109.3			2.1378	100	107.4
		0.7197	101.3	101.4	108	124.1			0.7197	93.3	100.2
		0.25398	105.7	86.1	104.5	99.6			0.25398	95.4	103
		0.08466	137.8	113	87	120.6			0.08466	100.5	102.4
		0.021165	98.8	87.5	98	86.5			0.021165	102	94.8
