# Supplementary material for: Small-molecule inhibitors of human mitochondrial DNA transcription
Source: Springer Nature journal article supplement (doi:10.1038/s41586-020-03048-z), 2020-12-16
Supplement: MOESM12 [file 41586_2020_3048_MOESM12_ESM.xlsx]

## Sheet: Ext  7 a
		DMSO					IMT1
	0h	1.005	1.02063	1.05502	0.99875	0.9206	1.00188	0.979994	0.979994	0.995624	1.10191
	6h	0.994898	0.989229	1.0119	0.986395	1.01757	0.994898	0.975057	0.943878	1.02324	1.0119
	24h	1.00285	1.00997	0.993354	1.01472	0.979112	0.981486	0.998101	0.983859	0.993354	0.969618
	48h	0.992788	1.01082	0.992788	1.00406	0.999549	0.992788	1.0311	1.01082	1.04913	0.974758
	96h	1.12275	1.0222	0.955174	1.00545	0.894428	0.91328	0.865103	0.906996	0.890239	0.835777

## Sheet: Ext 7 d
	Metabolite levels (mean)
		Compound ID	48h		96h		120h		168h		216h
			Con	IMT	Con	IMT	Con	IMT	Con	IMT	Con	IMT
		3-Phosphoglyceric acid	220356	210385	334856	205287	644249	246471	521607	222716	472949	184243
		Aconitic acid	44921.8	36833.2	48127.8	46381.1	58700.9	31744.2	51251.2	21505.2	57704.2	13255.6
		alpha-ketoglutaric acid	30349.2	14100.8	37117	13356.3	41646.1	10226.3	36815.4	11341.7	37296.2	8390.39
		Citric acid	1.58013e+06	1.55174e+06	1.63387e+06	1.49884e+06	1.58912e+06	1.08777e+06	1.39207e+06	850244	1.47984e+06	593031
		Fructose-1,6-BP	3568.86	4153.93	3943.9	5183.3	4451.86	4180.44	4349.6	4755.56	3729.67	3824
		Fumaric Acid	19387.7	15905.6	23780.7	18065.4	36025.3	12235.6	40602.1	12317.8	42597.7	8460.42
		Isocitric acid	13217.2	10367.5	19471.7	19659.9	21770.3	12835.4	19187.5	9290.14	26365.8	5236.34
		Lactic acid	31838.2	30028.1	31324.8	29823.4	39122.3	24357.5	46581.3	34159.5	52781.5	36189.4
		Malic acid	11573.9	11729.6	11740.2	13248.1	14519.3	9156.07	16667.9	9180.04	15963.5	6492.33
		Phosphoenolpyruvate	36431	36082.2	49500.9	28770.4	116178	38757.3	76175.2	34285.3	81252.5	33050
		Pyruvic acid	2428.51	2133.64	2418.07	1708.04	2683.06	1149.2	2577.4	1051.03	2752.9	1060.47
		Succinic acid	87965.5	49947.9	99109	39157.1	102774	35610.3	93488.5	36911.9	88463.2	28415.5
		Citrullin	2134407	2187743	3712194	1933493	3677161	1600228	3705998	1548996	3388288	1017436
		Ornithin	14602701	16006150	36669057	19604484	40561136	15684514	53432583	14715820	74203747	14252940
		Putrescine	134203005	154539708	152542911	103961090	277304718	181725601	275721882	182240484	168966182	49103575
		Spermidine	40805772	36195952	38410167	44788763	36218105	21900207	43496015	36966003	47373729	27947012
