# Supplementary material for: Small-molecule inhibitors of human mitochondrial DNA transcription
Source: Springer Nature journal article supplement (doi:10.1038/s41586-020-03048-z), 2020-12-16
Supplement: MOESM13 [file 41586_2020_3048_MOESM13_ESM.xlsx]

## Sheet: Ext 8 a
	Time (min)	conc. [ng/ml]
	0:05:00	1979.6
	0:15:00	1011.9
	0:30:00	837.7
	1:00:00	554.3
	2:00:00	303.8
	4:00:00	115.9
	8:00:00	31.7

## Sheet: Ext 8 b
		Time (min)	conc. [ng/ml]
		0:05:00	1893.8
		0:15:00	4661.7
		0:30:00	4980.5
		1:00:00	5148.7
		2:00:00	3480.9
		4:00:00	1913
		8:00:00	800.6
		12:00:00	312.5
		16:00:00	63
		24:00:00	15.9

## Sheet: Ext 8 c
hPOLRMT					mPOLRMT
0 µM IMT1B		10 µM IMT1B			0 µM IMT1B		10 µM IMT1B
Temperature (°C)	Fnorm (A.U.)	Temperature (°C)	Fnorm (A.U.)		Temperature (°C)	Fnorm (A.U.)	Temperature (°C)	Fnorm (A.U.)
20.5	0.5965	20.5	0.0576		20.5	0.061	20.5	0.0542		Values given are Mean values
21	0.5636	21	0.0541		21	0.0573	21	0.0518
21.5	0.532	21.5	0.0508		21.5	0.0538	21.5	0.0495
22	0.5013	22	0.0478		22	0.0503	22	0.0474
22.5	0.4709	22.5	0.0452		22.5	0.047	22.5	0.0455
23	0.4415	23	0.043		23	0.0439	23	0.0435
23.5	0.4118	23.5	0.0408		23.5	0.0408	23.5	0.0415
24	0.3827	24	0.0388		24	0.0376	24	0.0393
24.5	0.354	24.5	0.0364		24.5	0.0345	24.5	0.037
25	0.3256	25	0.0339		25	0.0313	25	0.0343
25.5	0.2973	25.5	0.0308		25.5	0.028	25.5	0.0317
26	0.2699	26	0.0273		26	0.0245	26	0.0288
26.5	0.2426	26.5	0.0239		26.5	0.0211	26.5	0.0259
27	0.2163	27	0.0205		27	0.0178	27	0.0232
27.5	0.1911	27.5	0.0172		27.5	0.0149	27.5	0.0208
28	0.1676	28	0.0146		28	0.0123	28	0.0187
28.5	0.145	28.5	0.0124		28.5	0.0102	28.5	0.0167
29	0.1234	29	0.0102		29	0.0082854	29	0.0149
29.5	0.1027	29.5	0.0083646		29.5	0.0064732	29.5	0.0132
30	0.0824	30	0.0066774		30	0.0046102	30	0.0113
30.5	0.0631	30.5	0.0044891		30.5	0.002711	30.5	0.0092898
31	0.0459	31	0.0026689		31	0.0012758	31	0.0076713
31.5	0.0311	31.5	0.0013396		31.5	0.00039143	31.5	0.0062868
32	0.0189	32	0.00036812		32	0	32	0.0050763
32.5	0.0098698	32.5	0		32.5	0.00034794	32.5	0.0040797
33	0.0036655	33	0.00052151		33	0.001341	33	0.0033307
33.5	5.7051e-05	33.5	0.0015339		33.5	0.0027183	33.5	0.0025682
34	0	34	0.003037		34	0.0046175	34	0.0017456
34.5	0.0038509	34.5	0.0049186		34.5	0.0071981	34.5	0.0010099
35	0.0121	35	0.0070864		35	0.0105	35	0.00045479
35.5	0.0256	35.5	0.0094997		35.5	0.0149	35.5	5.3505e-05
36	0.0451	36	0.0123		36	0.0205	36	0
36.5	0.0704	36.5	0.0157		36.5	0.0274	36.5	0.00038122
37	0.1028	37	0.02		37	0.0358	37	0.0010768
37.5	0.142	37.5	0.0251		37.5	0.0461	37.5	0.0022338
38	0.1874	38	0.0313		38	0.0585	38	0.003859
38.5	0.2384	38.5	0.039		38.5	0.0735	38.5	0.0057718
39	0.2942	39	0.0481		39	0.092	39	0.0083601
39.5	0.3523	39.5	0.059		39.5	0.1146	39.5	0.0118
40	0.4115	40	0.0725		40	0.1423	40	0.0163
40.5	0.4708	40.5	0.0892		40.5	0.1757	40.5	0.0219
41	0.5282	41	0.1091		41	0.2156	41	0.0291
41.5	0.5821	41.5	0.1333		41.5	0.2623	41.5	0.0379
42	0.6324	42	0.1618		42	0.3162	42	0.0486
42.5	0.6777	42.5	0.1952		42.5	0.3768	42.5	0.0617
43	0.7178	43	0.2341		43	0.4435	43	0.0776
43.5	0.7528	43.5	0.2792		43.5	0.515	43.5	0.0971
44	0.7835	44	0.3296		44	0.5883	44	0.1209
44.5	0.8098	44.5	0.3853		44.5	0.6604	44.5	0.1499
45	0.8326	45	0.445		45	0.7286	45	0.1851
45.5	0.8522	45.5	0.5063		45.5	0.7901	45.5	0.2276
46	0.8693	46	0.5672		46	0.8428	46	0.2782
46.5	0.8837	46.5	0.6257		46.5	0.8863	46.5	0.3374
47	0.8958	47	0.6796		47	0.921	47	0.4051
47.5	0.9057	47.5	0.7273		47.5	0.9478	47.5	0.48
48	0.9138	48	0.7679		48	0.9674	48	0.5595
48.5	0.9196	48.5	0.8014		48.5	0.9814	48.5	0.6402
49	0.9236	49	0.8279		49	0.991	49	0.7178
49.5	0.9259	49.5	0.8484		49.5	0.9968	49.5	0.7883
50	0.9266	50	0.8641		50	0.9994	50	0.8484
50.5	0.9262	50.5	0.8763		50.5	1	50.5	0.8964
51	0.9254	51	0.8864		51	0.9988	51	0.9322
51.5	0.9246	51.5	0.8952		51.5	0.9959	51.5	0.9571
52	0.9247	52	0.9037		52	0.9918	52	0.9729
52.5	0.9267	52.5	0.9129		52.5	0.9872	52.5	0.9823
53	0.9319	53	0.9235		53	0.9827	53	0.9875
53.5	0.9411	53.5	0.9362		53.5	0.9789	53.5	0.9903
54	0.9548	54	0.9524		54	0.9762	54	0.9926
54.5	0.9738	54.5	0.9732		54.5	0.9756	54.5	0.9953
55	1	55	1		55	0.9775	55	1

## Sheet: Ext 8 e
	A2780 xenograft #2		Tumor Size (cm3)
			Day	Veh								IMT1B
			5	0.091	0.102	0.126	0.065	0.086	0.113	0.105	0.078	0.08	0.099	0.068	0.083	0.106	0.119	0.095	0.117
			7	0.115	0.125	0.152	0.106	0.095	0.181	0.168	0.104	0.125	0.092	0.123	0.138	0.127	0.194	0.121	0.13
			9	0.08	0.159	0.18	0.103	0.116	0.191	0.179	0.138	0.15	0.129	0.156	0.148	0.187	0.228	0.173	0.143
			12	0.113	0.326	0.402	0.176	0.089	0.257	0.128	0.108	0.096	0.123	0.102	0.118	0.185	0.17	0.169	0.143
			14	0.175	0.464	0.462	0.229	0.137	0.27	0.104	0.114	0.128	0.119	0.12	0.158	0.359	0.235	0.194	0.226
			16	0.284	0.567	0.507	0.35	0.188	0.435	0.167	0.187	0.159	0.186	0.137	0.205	0.602	0.24	0.353	0.34
			19	0.509	1.088	0.748	0.565	0.34	0.734	0.286	0.257	0.178	0.17	0.12	0.261	0.753	0.296	0.251	0.238
			21	0.822	1.673	1.058	0.676	0.465	0.898	0.253	0.238	0.165	0.226	0.194	0.225	0.733	0.352	0.196	0.296
			23	1.378	2.375	1.385	1	0.734	1.434	0.485	1.336	0.273	0.309	0.201	0.268	1.453	0.454	0.35	0.5
			tumour data_day 19			tumour data_day 21				tumour data_day 23
		Column B	IMT1B			Column B	IMT1B			Column B	IMT1B
		vs.	vs,			vs.	vs,			vs.	vs,
		Column A	Veh			Column A	Veh			Column A	Veh
		Mann Whitney test				Mann Whitney test				Mann Whitney test
		P value	0.0207			P value	0.0104			P value	0.0104
		Exact or approximate P value?	Exact			Exact or approximate P value?	Exact			Exact or approximate P value?	Exact
		P value summary	*			P value summary	*			P value summary	*
		Significantly different (P < 0.05)?	Yes			Significantly different (P < 0.05)?	Yes			Significantly different (P < 0.05)?	Yes
		One- or two-tailed P value?	Two-tailed			One- or two-tailed P value?	Two-tailed			One- or two-tailed P value?	Two-tailed
		Sum of ranks in column A,B	90 , 46			Sum of ranks in column A,B	92 , 44			Sum of ranks in column A,B	92 , 44
		Mann-Whitney U	10			Mann-Whitney U	8			Mann-Whitney U	8
		Difference between medians				Difference between medians				Difference between medians
		Median of column A	0,5370, n=8			Median of column A	0,7490, n=8			Median of column A	1,357, n=8
		Median of column B	0,2445, n=8			Median of column B	0,2255, n=8			Median of column B	0,3295, n=8
		Difference: Actual	-0.2925			Difference: Actual	-0.5235			Difference: Actual	-1.028
		Difference: Hodges-Lehmann	-0.27			Difference: Hodges-Lehmann	-0.4605			Difference: Hodges-Lehmann	-0.9035

## Sheet: Ext 8 f
	DLD-1 xenograft	Tumor Size (cm3)
	Day	Veh								IMT1B
	12	0.096	0.205	0.202	0.088	0.165	0.124	0.18	0.129	0.084	0.196	0.094	0.146	0.166	0.208	0.168	0.127
	15	0.208	0.338	0.367	0.198	0.233	0.209	0.314	0.257	0.144	0.316	0.176	0.181	0.265	0.365	0.234	0.101
	19	0.33	0.365	0.711	0.26	0.353	0.33	0.478	0.412	0.343	0.521	0.319	0.281	0.358	0.426	0.339	0.147
	22	0.522	0.411	0.7	0.399	0.51	0.52	0.665	0.632	0.491	0.555	0.39	0.392	0.41	0.599	0.354	0.219
	26	0.703	0.71	0.888	0.518	0.8	0.725	0.819	0.879	0.56	0.739	0.431	0.509	0.491	0.669	0.37	0.254
	29	0.876	0.685	1.158	0.684	0.853	0.821	1.001	0.883	0.502	0.82	0.418	0.68	0.573	0.77	0.395	0.317
	33	1.038	0.903	1.58	0.805	1.189	1.044	1.018	1.243	0.606	0.89	0.558	0.646	0.468	0.782	0.459	0.312
	36	1.292	1.025	1.477	1.024	1.337	1.077	1.104	1.384	0.469	0.867	0.492	0.641	0.474	0.646	0.45	0.357
	39	1.581	1.331	1.828	1.194	1.558	1.444	1.429	1.388	0.583	0.834	0.519	0.668	0.447	0.808	0.56	0.356
	Table Analyzed	day 22
	Column A	Veh
	vs	vs
	Column B	100mg/kg
	Mann Whitney test
	P value	0.0499
	Exact or approximate P value?	Exact
	P value summary	*
	Are medians signif. different? (P < 0.05)	Yes
	One- or two-tailed P value?	Two-tailed
	Sum of ranks in column A,B	87 , 49
	Mann-Whitney U	13
	Table Analyzed	day 26
	Column A	Veh
	vs	vs
	Column B	100mg/kg
	Mann Whitney test
	P value	0.0047
	Exact or approximate P value?	Exact
	P value summary	**
	Are medians signif. different? (P < 0.05)	Yes
	One- or two-tailed P value?	Two-tailed
	Sum of ranks in column A,B	94 , 42
	Mann-Whitney U	6
	Table Analyzed	day 29
	Column A	Veh
	vs	vs
	Column B	100mg/kg
	Mann Whitney test
	P value	0.0019
	Exact or approximate P value?	Exact
	P value summary	**
	Are medians signif. different? (P < 0.05)	Yes
	One- or two-tailed P value?	Two-tailed
	Sum of ranks in column A,B	96 , 40
	Mann-Whitney U	4
	Table Analyzed	day 33
	Column A	Veh
	vs	vs
	Column B	100mg/kg
	Mann Whitney test
	P value	0.0003
	Exact or approximate P value?	Exact
	P value summary	***
	Are medians signif. different? (P < 0.05)	Yes
	One- or two-tailed P value?	Two-tailed
	Sum of ranks in column A,B	99 , 37
	Mann-Whitney U	1
	Table Analyzed	day 36
	Column B	100mg/kg
	vs.	vs,
	Column A	Veh
	Mann Whitney test
	P value	0.0002
	Exact or approximate P value?	Exact
	P value summary	***
	Significantly different (P < 0.05)?	Yes
	One- or two-tailed P value?	Two-tailed
	Sum of ranks in column A,B	100 , 36
	Mann-Whitney U	0
	Difference between medians
	Median of column A	1198, n=8
	Median of column B	483,0, n=8
	Difference: Actual	-715
	Difference: Hodges-Lehmann	-648.5
	Table Analyzed	day 39
	Column A	Veh
	vs	vs
	Column B	100mg/kg
	Mann Whitney test
	P value	0.0002
	Exact or approximate P value?	Exact
	P value summary	***
	Are medians signif. different? (P < 0.05)	Yes
	One- or two-tailed P value?	Two-tailed
	Sum of ranks in column A,B	100 , 36
	Mann-Whitney U	0

## Sheet: Ext 8 g 
		Group		Day:	7	11	13	15	18	20	22	25	27	29	32	34
		A	(n)		8	8	8	8	8	8	8	8	8	6	6	6
			Body Weight	Median	29.81	29.645	30.58	30.69	30.6	31.115	32.485	31.4	32.51	32.025	32.905	32.3
			[g]	Mean	29.6275	29.64	30.37	30.0463	29.8612	30.7662	32.0825	31.1038	32.3075	31.8017	32.2917	31.955
				[S.D.]	2.29489	2.155	2.45323	2.44356	2.45274	2.43214	2.55313	2.22097	2.06748	2.02486	2.33241	2.04428
			BWC [%]		100	100.042	102.506	101.413	100.789	103.844	108.286	104.983	109.046	107.338	108.992	107.856
		C	(n)		8	8	8	8	8	8	8	8	8	6	6	6
			Body Weight	Median	27.67	27.99	28.195	27.515	26.365	26.54	28.34	27.465	29.835	29.095	29.68	28.855
			[g]	Mean	27.6325	27.86	27.9563	27.625	26.6687	26.9213	28.445	27.225	29.4988	29.41	29.855	28.9967
				[S.D.]	1.47357	1.4694	1.3011	1.83036	1.80036	1.51783	1.77038	2.02515	1.70337	1.7276	1.67857	1.49529
			BWC [%]	Mean	100	100.823	101.172	99.9729	96.5123	97.426	102.94	98.5253	106.754	106.433	108.043	104.937

## Sheet: Ext 8 j
		Tumour									Liver									Heart
	Veh	1.21518	1.01226	1.39512	1.0761	0.829698	0.99425	0.822102	0.655282	Veh	1.24576	1.21765	0.813198	1.28103	1.18989	0.698058	0.740568	0.813855	Veh	0.963781	1.20433	1.08238	1.30096	1.17832	1.02225	0.510891	0.737083
	IMT	0.582277	1.38474	0.515678	1.01918	0.708245	0.616165	0.659608	0.988269	IMT	0.594839	0.906944	1.24816	1.09893	1.10416	1.20282	0.884402	0.508373	IMT	1.17772	0.831259	0.862623	0.81629	1.02791	0.985154	1.42004
	Ordinary Two-Way ANOVA, with Sidak's multiple comparisons test
	ANOVA table	SS (Type III)	DF	MS	F (DFn, DFd)	P value
	Interaction	0.08658	2	0.04329	F (2, 41) = 0,6458	P=0,5295
	Row Factor	0.06881	1	0.06881	F (1, 41) = 1,027	P=0,3169
	Column Factor	0.08658	2	0.04329	F (2, 41) = 0,6458	P=0,5295
	Residual	2.748	41	0.06704
	Compare each cell mean with the other cell mean in that column
	Number of families	1
	Number of comparisons per family	3
	Alpha	0.05
	Sidak's multiple comparisons test	Predicted (LS) mean diff,	95,00% CI of diff,	Significant?	Summary	Adjusted P Value
	Veh - IMT
	Tumour	0.1907	-0,1315 to 0,5130	No	ns	0.3822
	Liver	0.05642	-0,2658 to 0,3787	No	ns	0.9625
	Heart	-0.01728	-0,3508 to 0,3163	No	ns	0.9989
	Test details	Predicted (LS) mean 1	Predicted (LS) mean 2	Predicted (LS) mean diff,	SE of diff,	N1	N2	t	DF
	Veh - IMT
	Tumour	1	0.8093	0.1907	0.1295	8	8	1.473	41
	Liver	1	0.9436	0.05642	0.1295	8	8	0.4358	41
	Heart	1	1.017	-0.01728	0.134	8	7	0.129	41
